# Supplementary material for: Potential application value of hydroxychalcones based on isoliquiritigenin in agricultural plant diseases
Source: Royal Society of Chemistry journal article supplement (doi:10.1039/d2nj03261a), 2022-01-01
Supplement: d2nj03261a1.pdf [file d2nj03261a1.pdf]

# **Potential application value of hydroxychalcones based on isoliquiritigenin in agricultural plant diseases**

Hu-Li<sup>1</sup>, Zheng-Rong Wu<sup>1</sup>, Qing-Ru Chu<sup>1</sup>, Hong-Jie Liang<sup>1</sup>, Ying-Qian Liu<sup>1\*</sup>, Tian-Lin Wu<sup>1</sup>, Yue-  
Ma<sup>1</sup>.

<sup>1</sup>School of Pharmacy, Lanzhou University, Lanzhou 730000, People's Republic of China.

\* Corresponding author: yqliu@lzu.edu.cn (Y.-Q. Liu).

## **Content**

- 1. Table S1. The In vitro EC<sub>50</sub> values of the most active compounds against four phytopathogenic fungi in detail.**
- 2. Physical properties of the target compounds.**
- 3. Spectrum of the representative compounds.**

**Table S1** The EC<sub>50</sub> values of the most active compounds against four phytopathogenic fungi in detail.

| Compound          | <i>Sclerotinia sclerotiorum</i> |                |                          |
|-------------------|---------------------------------|----------------|--------------------------|
|                   | Regression equation             | R <sup>2</sup> | EC <sub>50</sub> (μg/mL) |
| LH-4              | -                               | -              | >20                      |
| LH-5              | -                               | -              | >20                      |
| LH-9              | -                               | -              | >20                      |
| LH-14             | y=4.23x-6.32                    | 0.921          | 32.18                    |
| LH-15             | y=3.27x-2.91                    | 0.871          | 9.12                     |
| Isoliquiritigenin | y=1.90x-3.61                    | 0.981          | 56.68                    |
| Azoxystrobin      | y=2.53x-2.94                    | 0.989          | 14.45                    |
| Compound          | <i>Botrytis cinerea</i>         |                |                          |
|                   | Regression equation             | R <sup>2</sup> | EC <sub>50</sub> (μg/mL) |
| LH-4              | -                               | -              | >20                      |
| LH-5              | -                               | -              | >20                      |
| LH-9              | -                               | -              | >20                      |
| LH-14             | y=4.14x-4.16                    | 0.971          | 10.06                    |
| LH-15             | y=2.90x-2.61                    | 0.990          | 7.96                     |
| Isoliquiritigenin | y=1.73x-2.33                    | 0.999          | 20.40                    |
| Azoxystrobin      | -                               | -              | >20                      |
| Compound          | <i>Fusarium graminearum</i>     |                |                          |
|                   | Regression equation             | R <sup>2</sup> | EC <sub>50</sub> (μg/mL) |
| LH-4              | -                               | -              | >20                      |
| LH-5              | -                               | -              | >20                      |
| LH-9              | -                               | -              | >20                      |
| LH-14             | -                               | -              | >20                      |
| LH-15             | y=1.95x-1.88                    | 0.990          | 9.06                     |

| Isoliquiritigenin         | $y=3.65x-5.63$      | 0.980          | 34.58                                 |
|---------------------------|---------------------|----------------|---------------------------------------|
| Azoxystrobin              | -                   | -              | >20                                   |
| <i>Rhizoctonia solani</i> |                     |                |                                       |
| Compound                  | Regression equation | R <sup>2</sup> | EC <sub>50</sub> ( $\mu\text{g/mL}$ ) |
| LH-4                      | $y=2.46x-1.76$      | 0.970          | 5.96                                  |
| LH-5                      | $y=2.95x-2.61$      | 0.990          | 8.17                                  |
| LH-9                      | $y=2.80x-2.98$      | 0.985          | 12.25                                 |
| LH-14                     | -                   | -              | >20                                   |
| LH-15                     | $y=1.95x-2.03$      | 0.967          | 11.62                                 |
| Isoliquiritigenin         | $y=3.06x-4.83$      | 0.996          | 36.91                                 |
| Azoxystrobin              | -                   | -              | >20                                   |

“-” means not test .

## 2. Physical properties of the target compounds.

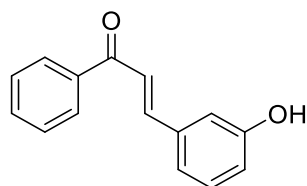

### LH-1. (E)-3-(3-hydroxyphenyl)-1-phenylprop-2-en-1-one

White solid, m.p. 163.24-164.64 °C, yield: 40%; <sup>1</sup>H NMR (400 MHz, Methanol-d<sub>4</sub>)  $\delta$  8.06 (d,  $J = 8.7$  Hz, 2H,  $\beta$ -H, ArH), 7.68 (d,  $J = 7.5$  Hz, 2H,  $\alpha$ -H, ArH), 7.65 – 7.58 (m, 1H, ArH), 7.53 (t,  $J = 7.6$  Hz, 2H, ArH), 7.23 (m,  $J = 16.3, 7.7$  Hz, 2H, ArH), 7.13 (s, 1H, ArH), 6.86 (d,  $J = 6.3$  Hz, 1H, ArH). <sup>13</sup>C NMR (101 MHz, Methanol-*d*<sub>4</sub>)  $\delta$  191.08, 157.75, 145.13, 137.98, 136.12, 132.78, 129.69, 128.44, 128.22, 121.52, 119.89, 117.61, 114.43. MS-ESI calcd for C<sub>15</sub>H<sub>12</sub>O<sub>2</sub>, [M+H]<sup>+</sup>, 224.0837; found, 225.1596.

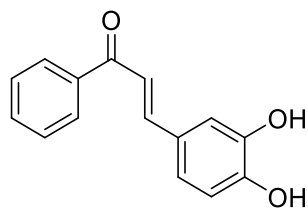

**LH-2. (E)-3-(3,4-dihydroxyphenyl)-1-phenylprop-2-en-1-one**

Yellow solid, m.p. 200.45-201.95 °C, yield: 30%; <sup>1</sup>H NMR (400 MHz, Methanol-*d*<sub>4</sub>) δ 8.01 (d, *J* = 8.7 Hz, 2H, β-H, ArH), 7.67 (d, *J* = 15.5 Hz, 1H, α-H), 7.59 (t, *J* = 7.5 Hz, 1H, ArH), 7.54 – 7.44 (m, 3H, ArH), 7.18 (d, *J* = 2.1 Hz, 1H, ArH), 7.09 (dd, *J* = 8.2, 2.1 Hz, 1H, ArH), 6.81 (d, *J* = 8.2 Hz, 1H, ArH). <sup>13</sup>C NMR (101 MHz, Methanol-*d*<sub>4</sub>) δ 191.34, 148.75, 146.07, 145.50, 138.36, 132.51, 128.37, 128.08, 126.85, 122.37, 118.29, 115.24, 114.35. MS-ESI calcd for C<sub>15</sub>H<sub>12</sub>O<sub>3</sub>, [M-H]<sup>+</sup>, 240.0786; found, 239.0906.

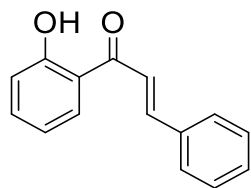

**LH-3. (E)-1-(2-hydroxyphenyl)-3-phenylprop-2-en-1-one**

Yellow solid, m.p. 140.04-140.14 °C, yield: 48%; <sup>1</sup>H NMR (400 MHz, Methanol-*d*<sub>4</sub>) δ 8.12 (d, *J* = 8.0 Hz, 1H, β-H), 7.89 (s, 2H, ArH), 7.76 (dd, *J* = 6.7, 2.9 Hz, 2H, α-H, ArH), 7.54 – 7.48 (m, 1H, ArH), 7.43 (t, *J* = 3.2 Hz, 3H, ArH), 6.97 (dd, *J* = 12.7, 7.9 Hz, 2H, ArH). <sup>13</sup>C NMR (101 MHz, Methanol-*d*<sub>4</sub>) δ 194.09, 163.04, 145.16, 136.05, 134.76, 130.57, 130.04, 128.71, 128.55, 120.29, 118.82, 117.68. MS-ESI calcd for C<sub>15</sub>H<sub>12</sub>O<sub>2</sub>, [M+H]<sup>+</sup>, 224.0837; found, 225.0834.

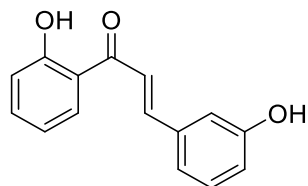

**LH-4. (E)-1-(2-hydroxyphenyl)-3-(3-hydroxyphenyl)prop-2-en-1-one**

Yellow solid, m.p. 159.11-160.01 °C, yield: 38%; <sup>1</sup>H NMR (400 MHz, Methanol-*d*<sub>4</sub>) δ 8.08 (d, *J* = 8.0 Hz, 1H, β-H), 7.81 (s, 2H, ArH), 7.51 (dd, 1H, α-H), 7.29 – 7.19 (m, 2H, ArH), 7.16 – 7.11 (m, 1H, ArH), 7.04 – 6.91 (m, 2H, ArH), 6.87 (m, 1H, ArH). <sup>13</sup>C NMR (101 MHz, Methanol-*d*<sub>4</sub>) δ 194.08, 163.01, 157.76, 145.37, 136.02, 129.96, 129.71, 120.14, 120.07, 118.81, 117.79, 117.69, 114.64. MS-ESI calcd for C<sub>15</sub>H<sub>12</sub>O<sub>3</sub>, [M+H]<sup>+</sup>, 240.0876; found, 241.1032.

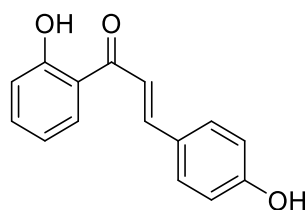

**LH-5. (E)-1-(2-hydroxyphenyl)-3-(4-hydroxyphenyl)prop-2-en-1-one**

Yellow solid, m.p. 160.27-160.97 °C, yield: 57%; <sup>1</sup>H NMR (400 MHz, Methanol-*d*<sub>4</sub>) δ 8.08 (d, *J* = 8.0 Hz, 1H, β-H), 7.85 (d, *J* = 15.3 Hz, 1H, ArH), 7.69 (m, 1H), 7.63 (d, *J* = 8.7 Hz, 2H, α-H, ArH), 7.51 – 7.45 (m, 1H, ArH), 6.99 – 6.91 (m, 2H, ArH), 6.84 (d, *J* = 8.6 Hz, 2H, ArH). <sup>13</sup>C NMR (101 MHz, Methanol-*d*<sub>4</sub>) δ 194.05, 162.99, 160.54, 145.75, 135.70, 130.75, 129.80, 126.24, 118.69, 117.62, 116.67, 115.59. MS-ESI calcd for C<sub>15</sub>H<sub>12</sub>O<sub>3</sub>, [M+H]<sup>+</sup>, 240.0786; found, 241.1549.

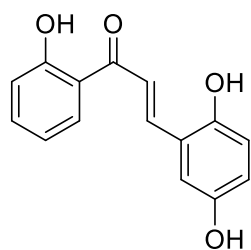

**LH-6. (E)-3-(2,5-dihydroxyphenyl)-1-(2-hydroxyphenyl)prop-2-en-1-one**

Brown solid, m.p. 193.16-195.86 °C, yield: 37%; <sup>1</sup>H NMR (400 MHz, Methanol-*d*<sub>4</sub>) δ 8.16 (d, *J* = 15.5 Hz, 1H, ArH), 8.03 (d, *J* = 7.0 Hz, 1H, β-H), 7.86 (d, *J* = 15.5 Hz, 1H, α-H), 7.49 (t, *J* = 7.8 Hz, 1H, ArH), 7.07 (d, *J* = 2.6 Hz, 1H, ArH), 6.96 (t, *J* = 9.1 Hz, 2H, ArH), 6.75 (m, 2H, ArH). <sup>13</sup>C NMR (101 MHz, Methanol-*d*<sub>4</sub>) δ 194.51, 163.00,

151.07, 150.00, 141.37, 135.78, 129.73, 121.93, 120.18, 119.55, 118.71, 117.68, 116.67, 114.01. MS-ESI calcd for C<sub>15</sub>H<sub>12</sub>O<sub>4</sub>, [M-H]<sup>+</sup>, 256.0736; found, 255.0975.

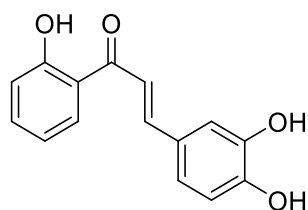

**LH-7. (E)-3-(3,4-dihydroxyphenyl)-1-(2-hydroxyphenyl)prop-2-en-1-one**

Orange-yellow solid, m.p. 180.33-181.93 °C, yield: 57%; <sup>1</sup>H NMR (400 MHz, Methanol-*d*<sub>4</sub>) δ 8.06 (d, *J* = 8.0 Hz, 1H, β-H), 7.79 (d, *J* = 15.2 Hz, 1H, ArH), 7.62 (d, *J* = 15.3 Hz, 1H, α-H), 7.52 – 7.44 (m, 1H, ArH), 7.20 (d, *J* = 2.1 Hz, 1H, ArH), 7.13 (m, 1H, ArH), 6.94 (m, 2H, ArH), 6.82 (d, *J* = 8.2 Hz, 1H, ArH). <sup>13</sup>C NMR (101 MHz, Methanol-*d*<sub>4</sub>) δ 193.99, 162.96, 148.95, 146.18, 145.52, 135.68, 129.71, 126.82, 122.63, 120.15, 118.69, 117.64, 116.63, 115.25, 114.57. MS-ESI calcd for C<sub>15</sub>H<sub>12</sub>O<sub>4</sub>, [M-H]<sup>+</sup>, 256.0736; found, 255.0874.

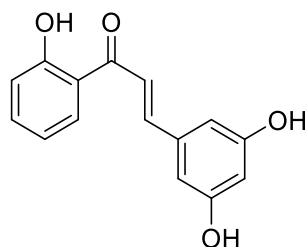

**LH-8. (E)-3-(3,5-dihydroxyphenyl)-1-(2-hydroxyphenyl)prop-2-en-1-one**

Orange-yellow solid, m.p. 187.59-189.19 °C, yield: 51%; <sup>1</sup>H NMR (400 MHz, Methanol-*d*<sub>4</sub>) δ 8.07 (d, *J* = 8.1, 1.6 Hz, 1H, β-H), 7.73 (s, 3H, ArH), 7.54 – 7.48 (d, 1H, α-H), 7.03 – 6.90 (m, 3H, ArH), 6.37 (s, 1H, ArH). <sup>13</sup>C NMR (101 MHz, Methanol-*d*<sub>4</sub>) δ 194.10, 162.99, 158.70, 145.59, 136.33, 136.02, 129.89, 120.07, 120.01, 118.81, 117.69, 105.11. MS-ESI calcd for C<sub>15</sub>H<sub>12</sub>O<sub>4</sub>, [M+H]<sup>+</sup>, 256.0736; found, 257.1519.

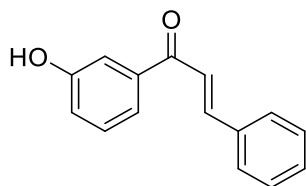

**LH-9. (E)-1-(3-hydroxyphenyl)-3-phenylprop-2-en-1-one**

Light yellow solid, m.p. 160.05-160.25 °C, yield: 29%;  $^1\text{H}$  NMR (400 MHz, Methanol- $d_4$ )  $\delta$  7.78 – 7.69 (m, 3H,  $\beta$ -H, ArH), 7.65 (d,  $J$  = 15.7 Hz, 1H, ArH), 7.54 (d,  $J$  = 7.6 Hz, 1H,  $\alpha$ -H), 7.44 – 7.39 (m, 4H, ArH), 7.35 (t,  $J$  = 7.9 Hz, 1H, ArH), 7.04 (dd,  $J$  = 8.1, 2.7 Hz, 1H, ArH).  $^{13}\text{C}$  NMR (101 MHz, Methanol- $d_4$ )  $\delta$  190.99, 157.74, 144.71, 139.35, 134.87, 130.35, 129.50, 128.69, 128.29, 121.82, 119.98, 119.60, 114.43. MS-ESI calcd for  $\text{C}_{15}\text{H}_{12}\text{O}_2$ ,  $[\text{M}+\text{H}]^+$ , 224.0837; found, 225.1267.

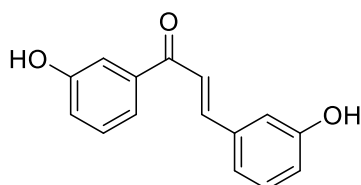

**LH-10. (E)-1,3-bis(3-hydroxyphenyl)prop-2-en-1-one**

White solid, m.p. 182.80-183.60 °C, yield: 33%;  $^1\text{H}$  NMR (400 MHz, Methanol- $d_4$ )  $\delta$  7.67 (d,  $J$  = 15.7 Hz, 1H,  $\beta$ -H), 7.60 – 7.49 (m, 2H, ArH), 7.41 (t,  $J$  = 2.1 Hz, 1H, ArH), 7.35 (t,  $J$  = 7.9 Hz, 1H, ArH), 7.24 (t,  $J$  = 7.8 Hz, 1H, ArH), 7.18 (d,  $J$  = 7.6 Hz, 1H,  $\alpha$ -H), 7.11 (t,  $J$  = 2.0 Hz, 1H, ArH), 7.04 (dd,  $J$  = 8.1, 2.5 Hz, 1H, ArH), 6.86 (dd,  $J$  = 7.8, 2.5 Hz, 1H, ArH).  $^{13}\text{C}$  NMR (101 MHz, Methanol- $d_4$ )  $\delta$  191.10, 157.73, 144.96, 139.38, 136.13, 129.69, 129.49, 121.71, 119.94, 119.86, 119.55, 117.58, 114.41, 114.36. MS-ESI calcd for  $\text{C}_{15}\text{H}_{12}\text{O}_3$ ,  $[\text{M}+\text{H}]^+$ , 240.0786; found, 241.1222.

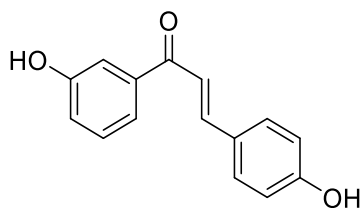

**LH-11. (E)-1-(3-hydroxyphenyl)-3-(4-hydroxyphenyl)prop-2-en-1-one**

Yellow solid, m.p. 193.74-195.34 °C, yield: 47%; <sup>1</sup>H NMR (400 MHz, Methanol-*d*<sub>4</sub>) δ 7.71 (d, *J* = 15.6 Hz, 1H, β-H), 7.62 – 7.56 (d, 2H, α-H, ArH), 7.53 – 7.45 (m, 2H, ArH), 7.40 (t, *J* = 2.1 Hz, 1H, ArH), 7.33 (t, *J* = 7.9 Hz, 1H, ArH), 7.02 (dd, *J* = 8.2, 2.6 Hz, 1H, ArH), 6.84 (d, *J* = 8.6 Hz, 2H, ArH). <sup>13</sup>C NMR (101 MHz, Methanol-*d*<sub>4</sub>) δ 191.30, 160.33, 157.66, 145.44, 139.73, 130.45, 129.41, 126.28, 119.67, 119.45, 118.45, 115.55, 114.34. MS-ESI calcd for C<sub>15</sub>H<sub>12</sub>O<sub>3</sub>, [M+H]<sup>+</sup>, 240.0786; found, 241.1222.

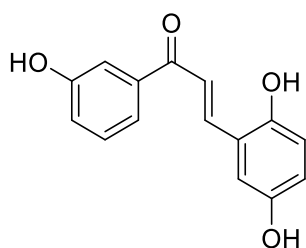

**LH-12. (E)-3-(2,5-dihydroxyphenyl)-1-(3-hydroxyphenyl)prop-2-en-1-one**

Brown solid, m.p. 190.04-191.14 °C, yield: 42%; <sup>1</sup>H NMR (400 MHz, Methanol-*d*<sub>4</sub>) δ 8.02 (d, *J* = 15.8 Hz, 1H, β-H), 7.64 (d, *J* = 15.8 Hz, 1H, ArH), 7.51 – 7.46 (d, 1H, α-H), 7.40 (t, *J* = 2.1 Hz, 1H, ArH), 7.34 (t, *J* = 7.9 Hz, 1H, ArH), 7.03 (m, 2H, ArH), 6.74 (m, 2H, ArH). <sup>13</sup>C NMR (101 MHz, Methanol-*d*<sub>4</sub>) δ 191.84, 157.66, 150.86, 149.97, 141.10, 139.72, 129.43, 121.99, 121.30, 119.71, 119.45, 119.29, 116.62, 114.39, 113.72. MS-ESI calcd for C<sub>15</sub>H<sub>12</sub>O<sub>4</sub>, [M+H]<sup>+</sup>, 256.0736; found, 257.1155.

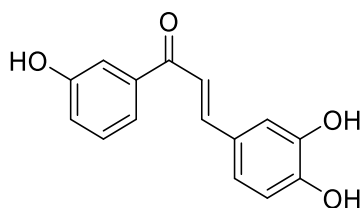

**LH-13. (E)-3-(3,4-dihydroxyphenyl)-1-(3-hydroxyphenyl)prop-2-en-1-one**

Yellow solid, m.p. 197.29-199.79 °C, yield: 35%; <sup>1</sup>H NMR (400 MHz, Methanol-*d*<sub>4</sub>) δ 7.65 (d, *J* = 15.5 Hz, 1H, β-H), 7.49 (d, *J* = 7.7 Hz, 1H, α-H), 7.43 – 7.37 (m, 2H, ArH), 7.33 (t, *J* = 7.9 Hz, 1H, ArH), 7.17 (d, *J* = 2.1 Hz, 1H, ArH), 7.08 (dd, *J* = 8.2, 2.1 Hz, 1H, ArH), 7.02 (dd, *J* = 8.0, 2.6 Hz, 1H, ArH), 6.81 (d, *J* = 8.2 Hz, 1H, ArH). <sup>13</sup>C NMR



(101 MHz, Methanol- $d_4$ )  $\delta$  191.35, 157.65, 148.71, 145.92, 145.49, 139.76, 129.42, 126.84, 122.34, 119.65, 119.40, 118.44, 115.22, 114.33, 114.25. MS-ESI calcd for  $C_{15}H_{12}O_4$ ,  $[M+H]^+$ , 256.0736; found, 257.1185.

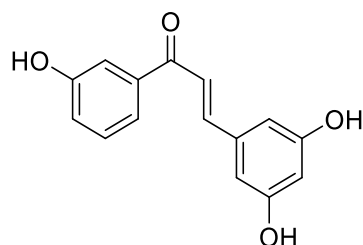

**LH-14. (E)-3-(3,5-dihydroxyphenyl)-1-(3-hydroxyphenyl)prop-2-en-1-one**

Brown solid, m.p. 160.03-160.23 °C, yield: 34%;  $^1H$  NMR (400 MHz, Methanol- $d_4$ )  $\delta$  7.58 (d,  $J$  = 15.6 Hz, 1H,  $\beta$ -H), 7.51 (s, 1H, ArH), 7.48 (d,  $J$  = 6.8 Hz, 1H,  $\alpha$ -H), 7.46 – 7.28 (m, 3H, ArH), 7.04 (dd,  $J$  = 8.1, 2.5 Hz, 1H, ArH), 6.62 (d,  $J$  = 2.2 Hz, 1H, ArH), 6.35 (s, 1H, ArH).  $^{13}C$  NMR (101 MHz, Methanol- $d_4$ )  $\delta$  191.16, 158.74, 158.68, 157.72, 145.21, 139.38, 129.50, 121.56, 119.93, 119.51, 114.37, 106.52, 104.87. MS-ESI calcd for  $C_{15}H_{12}O_4$ ,  $[M+H]^+$ , 256.0736; found, 257.1162.

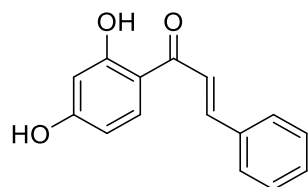

**LH-15. (E)-1-(2,4-dihydroxyphenyl)-3-phenylprop-2-en-1-one**

Yellow solid, m.p. 180.03-180.93 °C, yield: 54%;  $^1H$  NMR (400 MHz, Methanol- $d_4$ )  $\delta$  7.98 (d,  $J$  = 8.9 Hz, 1H,  $\beta$ -H), 7.80 (d,  $J$  = 5.0 Hz, 2H,  $\alpha$ -H, ArH), 7.77 – 7.70 (m, 2H, ArH), 7.41 (m, 3H, ArH), 6.42 (dd,  $J$  = 8.9, 2.4 Hz, 1H, ArH), 6.29 (d,  $J$  = 2.4 Hz, 1H, ArH).  $^{13}C$  NMR (101 MHz, Methanol- $d_4$ )  $\delta$  191.95, 166.27, 165.28, 143.74, 134.97, 132.20, 130.22, 128.65, 128.33, 120.47, 113.29, 107.90, 102.44. MS-ESI calcd for  $C_{15}H_{12}O_3$ ,  $[M-H]^+$ , 240.0786; found, 239.1013.

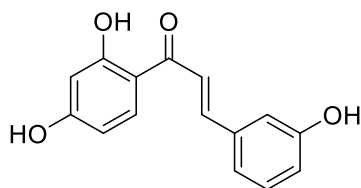

**LH-16. (E)-1-(2,4-dihydroxyphenyl)-3-(3-hydroxyphenyl)prop-2-en-1-one**

Yellow solid, m.p. 222.74-224.54 °C, yield: 47%;  $^1\text{H}$  NMR (400 MHz, Methanol- $d_4$ )  $\delta$  7.95 (d,  $J = 8.9, 1.3$  Hz, 1H,  $\beta$ -H), 7.77 – 7.72 (dd, 2H,  $\alpha$ -H, ArH), 7.28 – 7.17 (m, 2H, ArH), 7.11 (s, 1H, ArH), 6.85 (dd,  $J = 7.8, 2.3$  Hz, 1H, ArH), 6.42 (m, 1H, ArH), 6.33 – 6.26 (m, 1H, ArH).  $^{13}\text{C}$  NMR (101 MHz, Methanol- $d_4$ )  $\delta$  191.97, 166.25, 165.25, 157.69, 143.94, 136.26, 132.13, 129.66, 120.32, 119.85, 117.43, 114.48, 113.28, 107.89, 102.45. MS-ESI calcd for  $\text{C}_{15}\text{H}_{12}\text{O}_4$ ,  $[\text{M}+\text{H}]^+$ , 256.0736; found, 257.0987.

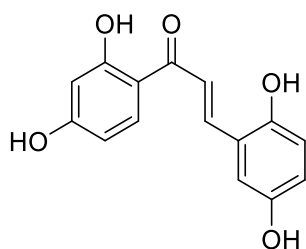

**LH-17. (E)-1-(2,4-dihydroxyphenyl)-3-(2,5-dihydroxyphenyl)prop-2-en-1-one**

Brown solid, m.p. 282.71-284.04 °C, yield: 47%;  $^1\text{H}$  NMR (400 MHz, Methanol- $d_4$ )  $\delta$  8.08 (d,  $J = 15.5$  Hz, 1H,  $\beta$ -H), 7.90 (d,  $J = 8.9$  Hz, 1H, ArH), 7.77 (d,  $J = 15.6$  Hz, 1H,  $\alpha$ -H), 7.05 (t,  $J = 1.7$  Hz, 1H, ArH), 6.73 (d,  $J = 1.8$  Hz, 2H, ArH), 6.41 (dd,  $J = 8.9, 2.4$  Hz, 1H, ArH), 6.29 (d,  $J = 2.3$  Hz, 1H, ArH).  $^{13}\text{C}$  NMR (101 MHz, Methanol- $d_4$ )  $\delta$  192.53, 166.16, 165.02, 150.77, 149.97, 139.90, 131.89, 122.17, 119.81, 119.09, 116.60, 113.87, 113.38, 107.75, 102.44. MS-ESI calcd for  $\text{C}_{15}\text{H}_{12}\text{O}_5$ ,  $[\text{M}-\text{H}]^+$ , 272.0685; found, 271.0979.

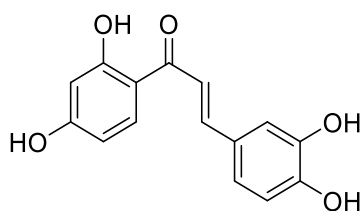

**LH-18. (E)-1-(2,4-dihydroxyphenyl)-3-(3,4-dihydroxyphenyl)prop-2-en-1-one**

Orange-yellow solid, m.p. 282.71-284.04 °C; yield: 70%; <sup>1</sup>H NMR (400 MHz, Methanol-*d*<sub>4</sub>) δ 7.93 (d, *J* = 8.9 Hz, 1H, β-H), 7.75 – 7.67 (m, 1H, ArH), 7.53 (d, *J* = 15.3 Hz, 1H, α-H), 7.17 (d, *J* = 2.0 Hz, 1H, ArH), 7.10 (dd, *J* = 8.3, 2.1 Hz, 1H, ArH), 6.82 – 6.77 (t, 1H, ArH), 6.41 (dd, *J* = 8.8, 2.4 Hz, 1H, ArH), 6.28 (d, *J* = 2.4 Hz, 1H, ArH). <sup>13</sup>C NMR (101 MHz, Methanol-*d*<sub>4</sub>) δ 192.09, 166.10, 164.94, 148.53, 145.44, 144.69, 131.89, 127.04, 122.21, 116.90, 115.21, 114.43, 113.33, 107.74, 102.43. MS-ESI calcd for C<sub>15</sub>H<sub>12</sub>O<sub>5</sub>, [M+H]<sup>+</sup>, 272.0685; found, 273.0497.

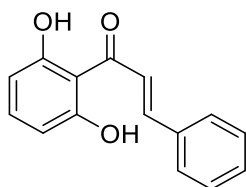**LH-19. (E)-1-(2,6-dihydroxyphenyl)-3-phenylprop-2-en-1-one**

Orange solid, m.p. 169.45-172.05 °C, yield: 54%; <sup>1</sup>H NMR (400 MHz, Methanol-*d*<sub>4</sub>) δ 8.14 (d, *J* = 15.6 Hz, 1H, β-H), 7.78 (d, *J* = 15.7 Hz, 1H, α-H), 7.66 – 7.62 (m, 2H, ArH), 7.41 (m, 3H, ArH), 7.23 (t, *J* = 8.2 Hz, 1H, ArH), 6.39 (d, *J* = 8.2 Hz, 2H, ArH). <sup>13</sup>C NMR (101 MHz, Methanol-*d*<sub>4</sub>) δ 194.86, 161.91, 142.65, 135.62, 135.36, 130.01, 128.63, 128.10, 127.43, 110.81, 107.12. MS-ESI calcd for C<sub>15</sub>H<sub>12</sub>O<sub>3</sub>, [M-H]<sup>+</sup>, 240.0786; found, 239.0975.

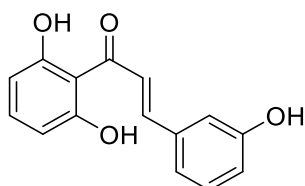**LH-20. (E)-1-(2,6-dihydroxyphenyl)-3-(3-hydroxyphenyl)prop-2-en-1-one**

Orange solid, m.p. 169.96-171.46 °C, yield: 44%; <sup>1</sup>H NMR (400 MHz, Methanol-*d*<sub>4</sub>) δ 8.09 (d, *J* = 15.6 Hz, 1H, β-H), 7.71 (d, *J* = 15.6 Hz, 1H, α-H), 7.23 (m, 2H, ArH), 7.12 – 7.06 (m, 2H, ArH), 6.84 (dd, *J* = 8.1, 2.5 Hz, 1H, ArH), 6.39 (d, *J* = 8.2 Hz, 2H, ArH). <sup>13</sup>C NMR (101 MHz, Methanol-*d*<sub>4</sub>) δ 194.88, 161.92, 157.66, 142.93, 136.65, 135.60,

129.61, 127.27, 119.93, 117.26, 114.05, 110.79, 107.12. MS-ESI calcd for C<sub>15</sub>H<sub>12</sub>O<sub>4</sub>, [M+H]<sup>+</sup>, 256.0736; found, 257.0998.

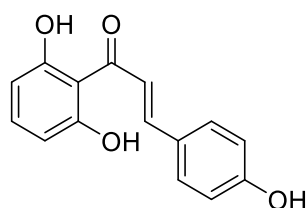

**LH-21. (E)-1-(2,6-dihydroxyphenyl)-3-(4-hydroxyphenyl)prop-2-en-1-one**

Orange-red solid, m.p. 150.85-153.15 °C, yield: 57%; <sup>1</sup>H NMR (400 MHz, Methanol-*d*<sub>4</sub>) δ 8.00 (d, *J* = 15.6 Hz, 1H, β-H), 7.76 (d, *J* = 15.6 Hz, 1H, α-H), 7.52 (d, *J* = 8.6 Hz, 2H, ArH), 7.21 (t, *J* = 8.2 Hz, 1H, ArH), 6.84 (m, 1H, ArH), 6.81 (s, 1H, ArH), 6.39 (s, 1H, ArH), 6.37 (s, 1H, ArH). <sup>13</sup>C NMR (101 MHz, Methanol-*d*<sub>4</sub>) δ 194.86, 161.76, 160.00, 143.57, 135.19, 130.21, 127.68, 126.80, 124.10, 115.51, 107.11. MS-ESI calcd for C<sub>15</sub>H<sub>12</sub>O<sub>4</sub>, [M+H]<sup>+</sup>, 256.0736; found, 257.1537.

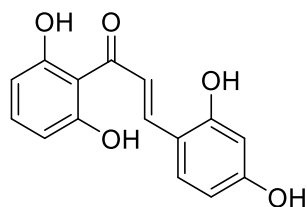

**LH-22. (E)-1-(2,6-dihydroxyphenyl)-3-(2,4-dihydroxyphenyl)prop-2-en-1-one**

Brown solid, m.p. 290.05-290.15 °C; yield: 39%; <sup>1</sup>H NMR (400 MHz, Methanol-*d*<sub>4</sub>) δ 7.37 (t, *J* = 8.3 Hz, 1H, ArH), 7.24 (d, *J* = 8.1 Hz, 1H, β-H), 6.56 – 6.39 (m, 3H, α-H, ArH), 6.33 (m, 2H, ArH), 5.66 (dd, *J* = 13.3, 2.9 Hz, 1H, ArH). <sup>13</sup>C NMR (101 MHz, Methanol-*d*<sub>4</sub>) δ 199.62, 162.42, 161.87, 158.45, 155.46, 137.74, 127.51, 116.29, 108.31, 107.72, 107.17, 106.38, 102.03. MS-ESI calcd for C<sub>15</sub>H<sub>12</sub>O<sub>5</sub>, [M-H]<sup>+</sup>, 272.0685; found, 271.0946.

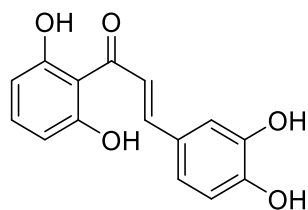

**LH-23. (E)-1-(2,6-dihydroxyphenyl)-3-(3,4-dihydroxyphenyl)prop-2-en-1-one**

Brown solid, m.p. 176.34-178.44 °C, yield: 37%; <sup>1</sup>H NMR (400 MHz, Methanol-*d*<sub>4</sub>) δ 7.95 (d, *J* = 15.5 Hz, 1H, β-H), 7.69 (d, *J* = 15.5 Hz, 1H, α-H), 7.19 (t, *J* = 8.2 Hz, 1H, ArH), 7.12 (d, *J* = 2.1 Hz, 1H, ArH), 7.00 (dd, *J* = 8.2, 2.1 Hz, 1H, ArH), 6.79 (d, *J* = 8.0 Hz, 1H, ArH), 6.38 (s, 1H, ArH), 6.36 (s, 1H, ArH). <sup>13</sup>C NMR (101 MHz, Methanol-*d*<sub>4</sub>) δ 194.81, 161.77, 148.40, 145.45, 144.07, 135.17, 127.41, 124.05, 122.29, 115.15, 114.02, 110.88, 107.10. MS-ESI calcd for C<sub>15</sub>H<sub>12</sub>O<sub>5</sub>, [M-H]<sup>+</sup>, 272.0685; found, 271.0786.

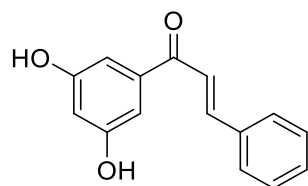

**LH-24. (E)-1-(3,5-dihydroxyphenyl)-3-phenylprop-2-en-1-one**

Yellow solid, m.p. 152.98-155.48 °C, yield: 61%; <sup>1</sup>H NMR (400 MHz, Methanol-*d*<sub>4</sub>) δ 7.78 – 7.68 (m, 3H, β-H, ArH), 7.58 (d, *J* = 15.8 Hz, 1H, α-H), 7.43 (m, 3H, ArH), 6.95 (s, 1H, ArH), 6.95 (s, 1H, ArH), 6.52 (t, *J* = 2.3 Hz, 1H, ArH). <sup>13</sup>C NMR (101 MHz, Methanol-*d*<sub>4</sub>) δ 191.11, 158.73, 144.63, 139.97, 134.87, 130.33, 128.70, 128.23, 121.95, 106.94, 106.52. MS-ESI calcd for C<sub>15</sub>H<sub>12</sub>O<sub>3</sub>, [M+H]<sup>+</sup>, 240.0786; found, 241.1564.

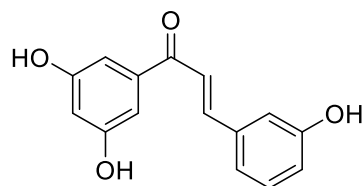

**LH-25. (E)-1-(3,5-dihydroxyphenyl)-3-(3-hydroxyphenyl)prop-2-en-1-one**

Brown solid, m.p. 214.78-215.78 °C, yield: 58%;  $^1\text{H}$  NMR (400 MHz, Methanol- $d_4$ )  $\delta$  7.65 (d,  $J = 15.7$  Hz, 1H,  $\beta$ -H), 7.48 (d,  $J = 15.7$  Hz, 1H,  $\alpha$ -H), 7.24 (t,  $J = 7.8$  Hz, 1H, ArH), 7.16 (d,  $J = 7.6$  Hz, 1H, ArH), 7.10 (t,  $J = 2.0$  Hz, 1H, ArH), 6.92 (d,  $J = 2.2$  Hz, 2H, ArH), 6.86 (dd,  $J = 8.0, 2.5$  Hz, 1H, ArH), 6.51 (t,  $J = 2.2$  Hz, 1H, ArH).  $^{13}\text{C}$  NMR (101 MHz, Methanol- $d_4$ )  $\delta$  191.23, 158.71, 157.73, 144.89, 140.00, 136.13, 129.70, 121.84, 119.82, 117.56, 114.29, 106.92, 106.50. MS-ESI calcd for  $\text{C}_{15}\text{H}_{12}\text{O}_4$ ,  $[\text{M}+\text{H}]^+$ , 256.0736; found, 257.0975.

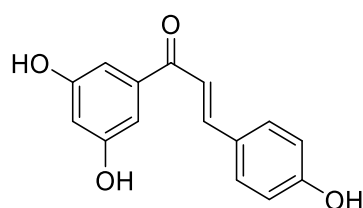

**LH-26. (E)-1-(3,5-dihydroxyphenyl)-3-(4-hydroxyphenyl)prop-2-en-1-one**

Grayish-yellow solid, m.p. 230.64-230.94 °C, yield: 28%;

$^1\text{H}$  NMR (400 MHz, Methanol- $d_4$ )  $\delta$  7.69 (d,  $J = 15.6$  Hz, 1H,  $\beta$ -H), 7.57 (d,  $J = 8.7$  Hz, 2H,  $\alpha$ -H, ArH), 7.38 (d,  $J = 15.6$  Hz, 1H, ArH), 6.91 (d,  $J = 2.2$  Hz, 2H, ArH), 6.83 (d,  $J = 8.5$  Hz, 2H, ArH), 6.50 (t,  $J = 2.2$  Hz, 1H, ArH).  $^{13}\text{C}$  NMR (101 MHz, Methanol- $d_4$ )  $\delta$  191.50, 160.28, 158.63, 145.38, 140.39, 130.37, 126.29, 118.63, 115.57, 106.67, 106.43. MS-ESI calcd for  $\text{C}_{15}\text{H}_{12}\text{O}_4$ ,  $[\text{M}+\text{H}]^+$ , 256.0736; found, 257.1520.

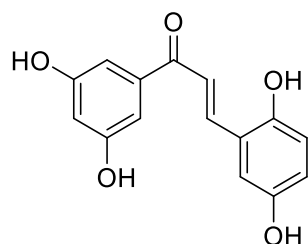

**LH-27. (E)-1-(3,5-dihydroxyphenyl)-3-(2,5-dihydroxyphenyl)prop-2-en-1-one**

Brown solid, m.p. 160.04-160.14 °C, yield: 59%;  $^1\text{H}$  NMR (400 MHz, Methanol- $d_4$ )  $\delta$  7.98 (d,  $J = 15.8$  Hz, 1H,  $\beta$ -H), 7.58 (d,  $J = 15.8$  Hz, 1H,  $\alpha$ -H), 7.01 (d,  $J = 2.3$  Hz, 1H, ArH), 6.91 (d,  $J = 2.3$  Hz, 2H, ArH), 6.73 (m, 2H, ArH), 6.49 (t,  $J = 2.2$  Hz, 1H, ArH).  $^{13}\text{C}$  NMR (101 MHz, Methanol- $d_4$ )  $\delta$  191.92, 158.65, 150.84, 149.96, 141.05, 140.38,

122.01, 121.53, 119.21, 116.62, 113.87, 106.71, 106.45. MS-ESI calcd for C<sub>15</sub>H<sub>12</sub>O<sub>5</sub>, [M+H]<sup>+</sup>, 272.0685; found, 273.0932.

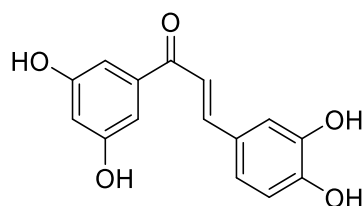

**LH-28. (E)-1-(3,5-dihydroxyphenyl)-3-(3,4-dihydroxyphenyl)prop-2-en-1-one**

Brown solid, m.p. 226.75-227.75 °C, yield: 43%; <sup>1</sup>H NMR (400 MHz, Methanol-*d*<sub>4</sub>) δ 7.59 (d, *J* = 15.6 Hz, 1H, β-H), 7.27 (d, *J* = 15.6 Hz, 1H, α-H), 7.11 (d, *J* = 2.1 Hz, 1H, ArH), 7.03 (dd, *J* = 8.2, 2.1 Hz, 1H, ArH), 6.86 (d, *J* = 2.2 Hz, 2H, ArH), 6.77 (d, *J* = 8.2 Hz, 1H, ArH), 6.45 (t, *J* = 2.2 Hz, 1H, ArH). <sup>13</sup>C NMR (101 MHz, Methanol-*d*<sub>4</sub>) δ 191.53, 158.64, 148.68, 145.84, 145.50, 140.43, 126.85, 122.27, 118.62, 115.23, 114.19, 106.63, 106.39. MS-ESI calcd for C<sub>15</sub>H<sub>12</sub>O<sub>5</sub>, [M+H]<sup>+</sup>, 272.0685; found, 273.0945.

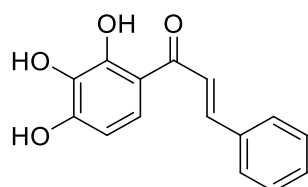

**LH-29. (E)-1-(2,3,4-trihydroxyphenyl)-3-phenylprop-2-en-1-one**

Orange-yellow solid, m.p. 164.67-166.47 °C, yield: 39%; <sup>1</sup>H NMR (400 MHz, Methanol-*d*<sub>4</sub>) δ 7.80 (d, *J* = 6.6 Hz, 2H, β-H, ArH), 7.75 – 7.70 (m, 2H, ArH), 7.57 (d, *J* = 8.9 Hz, 1H, α-H), 7.42 (m, 3H, ArH), 6.47 (d, *J* = 8.9 Hz, 1H, ArH). <sup>13</sup>C NMR (101 MHz, Methanol-*d*<sub>4</sub>) δ 192.56, 153.11, 152.27, 143.65, 134.97, 132.39, 130.22, 128.66, 128.32, 122.15, 120.53, 113.71, 107.31. MS-ESI calcd for C<sub>15</sub>H<sub>12</sub>O<sub>4</sub>, [M+H]<sup>+</sup>, 256.0736; found, 257.1540.

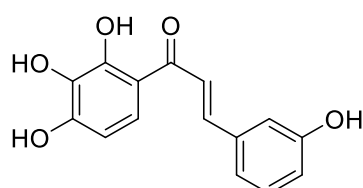

**LH-30. (E)- 1-(2,3,4-trihydroxyphenyl)-3-(3-hydroxyphenyl)prop-2-en-1-one**

Orange-yellow solid, m.p. 220.35-222.55 °C, yield: 46%; <sup>1</sup>H NMR (400 MHz, Methanol-*d*<sub>4</sub>) δ 7.78 – 7.66 (q, 2H, β-H, ArH), 7.54 (d, *J* = 8.9 Hz, 1H, α-H), 7.22 (m, 2H, ArH), 7.12 (t, *J* = 2.0 Hz, 1H, ArH), 6.85 (dd, *J* = 7.8, 2.0 Hz, 1H, ArH), 6.47 (d, *J* = 8.9 Hz, 1H, ArH). <sup>13</sup>C NMR (101 MHz, Methanol-*d*<sub>4</sub>) δ 192.57, 157.69, 153.09, 152.24, 143.85, 136.25, 132.39, 129.66, 122.07, 120.38, 119.87, 117.44, 114.45, 113.70, 107.30. MS-ESI calcd for C<sub>15</sub>H<sub>12</sub>O<sub>5</sub>, [M+H]<sup>+</sup>, 272.0685; found, 273.1506.

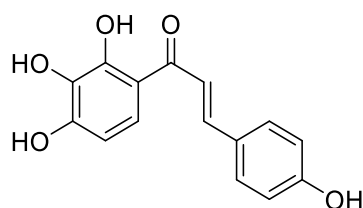

**LH-31. (E)- 1-(2,3,4-trihydroxyphenyl)-3-(4-hydroxyphenyl) prop-2-en-1-one**

Orange solid, m.p. 219.20-220.30 °C, yield: 36%; <sup>1</sup>H NMR (400 MHz, Methanol-*d*<sub>4</sub>) δ 7.78 (d, *J* = 15.4 Hz, 1H, β-H), 7.63 – 7.57 (m, 3H, ArH), 7.54 (d, *J* = 9.0 Hz, 1H, α-H), 6.83 (d, *J* = 8.5 Hz, 2H, ArH), 6.46 (d, *J* = 8.9 Hz, 1H, ArH). <sup>13</sup>C NMR (101 MHz, Methanol-*d*<sub>4</sub>) δ 192.75, 160.17, 153.03, 151.90, 144.18, 132.35, 130.44, 126.45, 121.90, 117.03, 115.54, 113.76, 107.15. MS-ESI calcd for C<sub>15</sub>H<sub>12</sub>O<sub>5</sub>, [M+H]<sup>+</sup>, 272.0685; found, 273.1519.

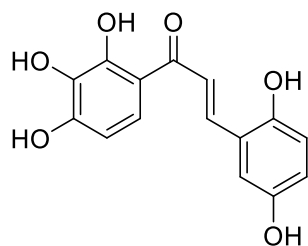

**LH-32. (E)-1-(2,3,4-trihydroxyphenyl)-3-(2,5-dihydroxyphenyl)prop-2-en-1-one**

Orange-red solid, m.p. 174.05-176.55 °C, yield: 66%; <sup>1</sup>H NMR (400 MHz, Methanol-*d*<sub>4</sub>) δ 8.09 (d, *J* = 15.6 Hz, 1H, β-H), 7.77 (d, *J* = 15.6 Hz, 1H, ArH), 7.49 (d, *J* = 8.9 Hz, 1H, α-H), 7.05 (s, 1H, ArH), 6.73 (d, *J* = 1.8 Hz, 2H, ArH), 6.46 (d, *J* = 8.9 Hz, 1H, ArH). <sup>13</sup>C NMR (101 MHz, Methanol-*d*<sub>4</sub>) δ 193.13, 153.06, 151.97, 150.78, 149.96,



139.80, 132.39, 122.17, 121.83, 119.89, 119.12, 116.63, 113.87, 113.81, 107.17. MS-ESI calcd for C<sub>15</sub>H<sub>12</sub>O<sub>6</sub>, [M+H]<sup>+</sup>, 288.0634; found, 289.0890.

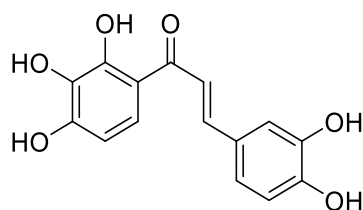

**LH-33. (E)-1-(2,3,4-trihydroxyphenyl)-3-(3,4-dihydroxyphenyl)prop-2-en-1-one**

Orange-yellow solid, m.p. 242.04-245.74 °C; yield: 53%; <sup>1</sup>H NMR (400 MHz, Methanol-*d*<sub>4</sub>) δ 7.71 (d, *J* = 15.3 Hz, 1H, β-H), 7.53 (d, *J* = 5.4 Hz, 1H, α-H), 7.50 (s, 1H, ArH), 7.17 (d, *J* = 2.1 Hz, 1H, ArH), 7.09 (dd, *J* = 8.2, 2.1 Hz, 1H, ArH), 6.81 (d, *J* = 8.1 Hz, 1H, ArH), 6.46 (d, *J* = 8.9 Hz, 1H, ArH). <sup>13</sup>C NMR (101 MHz, Methanol-*d*<sub>4</sub>) δ 192.69, 153.02, 151.88, 148.54, 145.45, 144.60, 132.36, 127.03, 122.24, 121.79, 116.98, 115.23, 114.39, 113.76, 107.15. MS-ESI calcd for C<sub>15</sub>H<sub>12</sub>O<sub>6</sub>, [M-H]<sup>+</sup>, 288.0634; found, 287.0929.

### 3. Spectrums of the representative compounds.

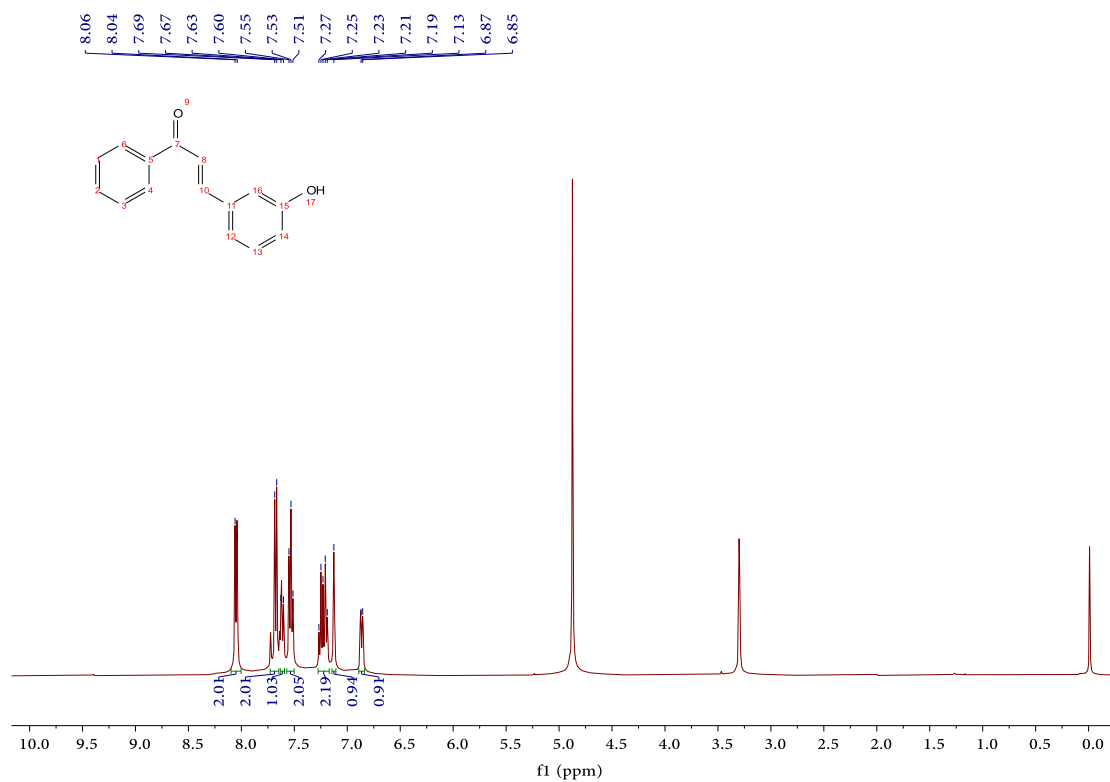

<sup>1</sup>H NMR spectrum of compound LH-1

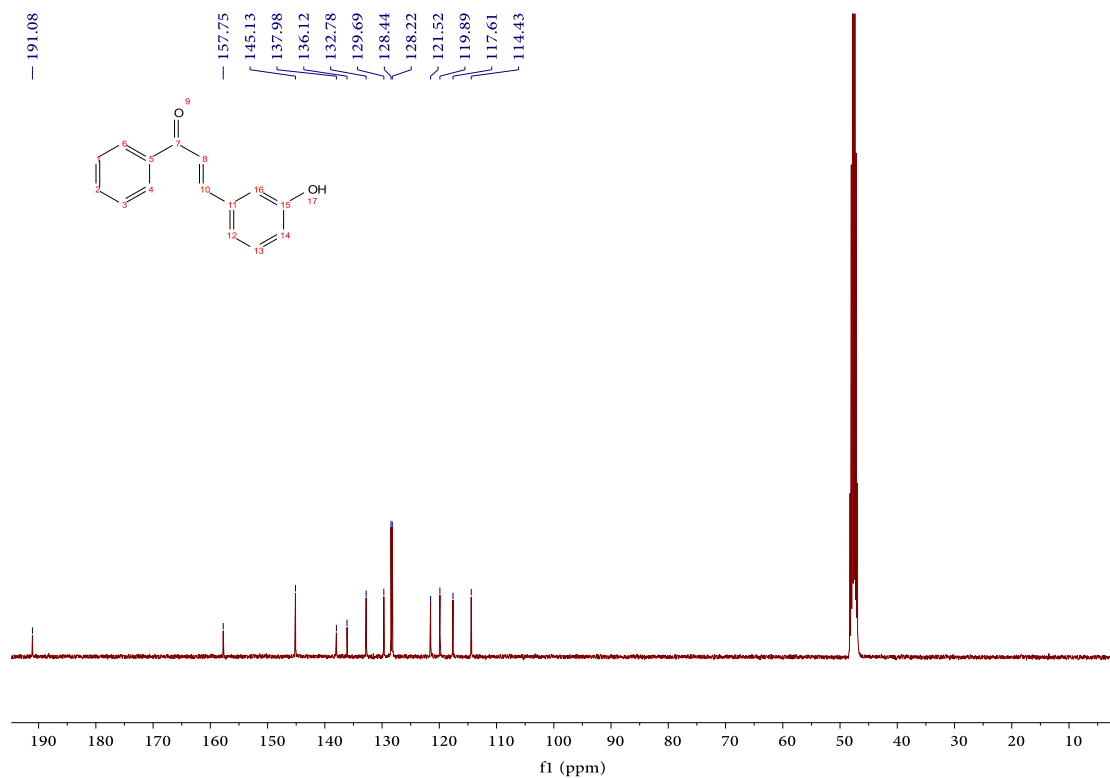

<sup>13</sup>C NMR spectrum of compound LH-1

# Generic Display Report

## Analysis Info

Analysis Name D:\Data\yangy\new\LIHU210112\_14\_23\_01\_36831.d  
Method POS\_100-1200\_ForLC.m  
Sample Name LIHU210112\_14  
Comment

Acquisition Date 1/12/2021 1:08:01 PM

Operator LZU  
Instrument micrOTOF

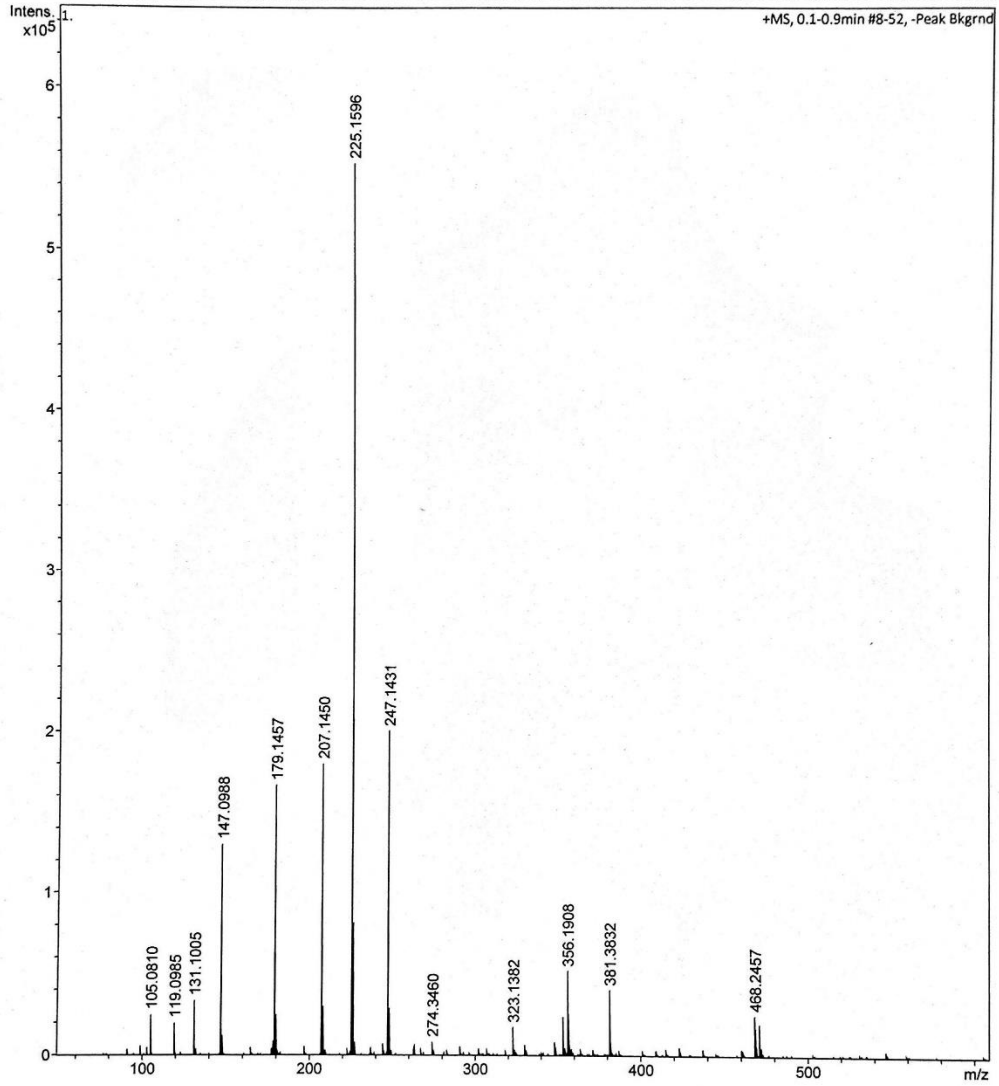

MS (ESI) spectrum of compound **LH-1**

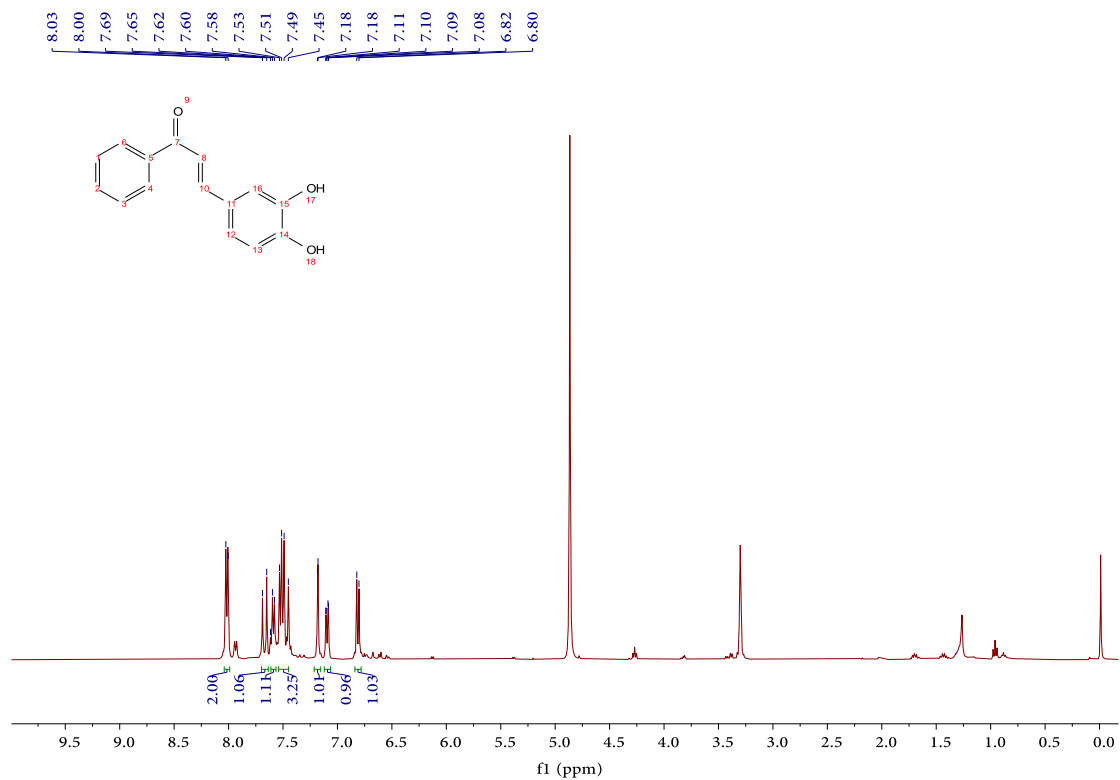

<sup>1</sup>H NMR spectrum of compound LH-2

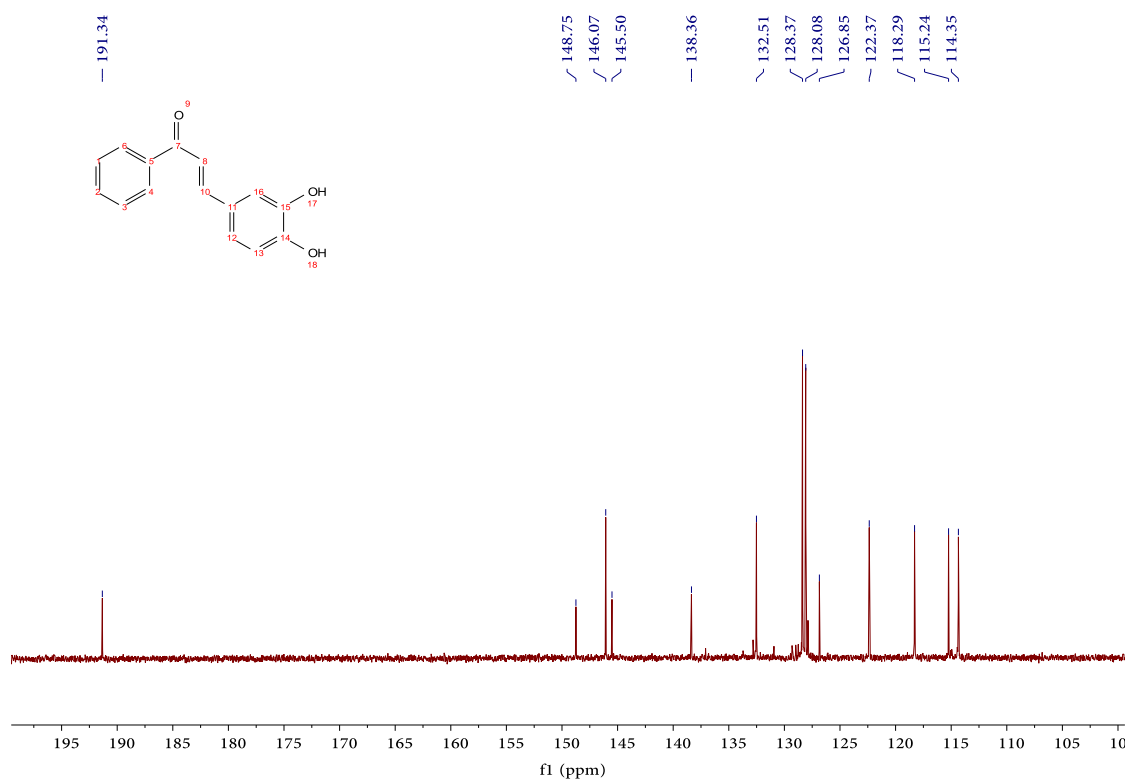

<sup>13</sup>C NMR spectrum of compound LH-2

## Generic Display Report

### Analysis Info

Analysis Name D:\Datayangy\newLIHU200917\_35\_01\_33808.d  
Method NEG\_100-1200\_For LC.m  
Sample Name LIHU200917  
Comment

Acquisition Date 9/17/2020 1:46:12 PM

Operator LZU  
Instrument micrOTOF

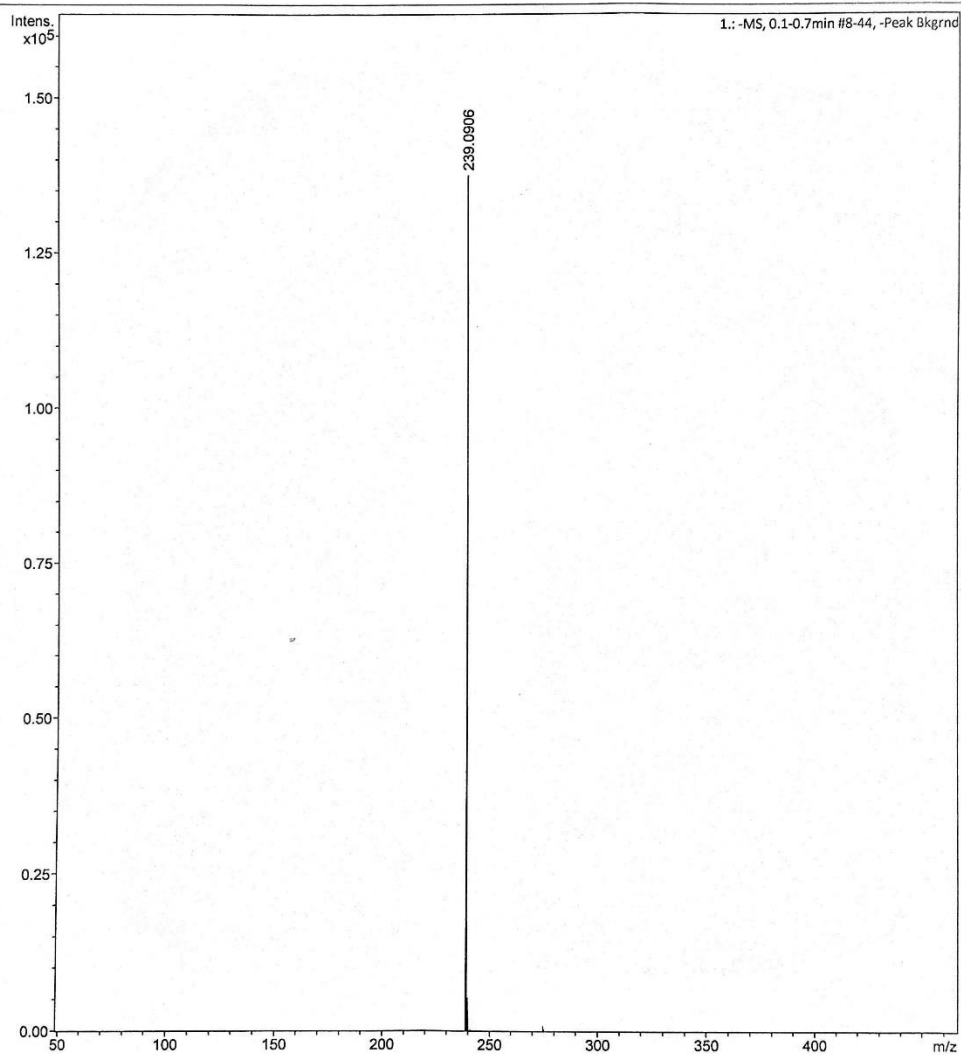

MS (ESI) spectrum of compound **LH-2**

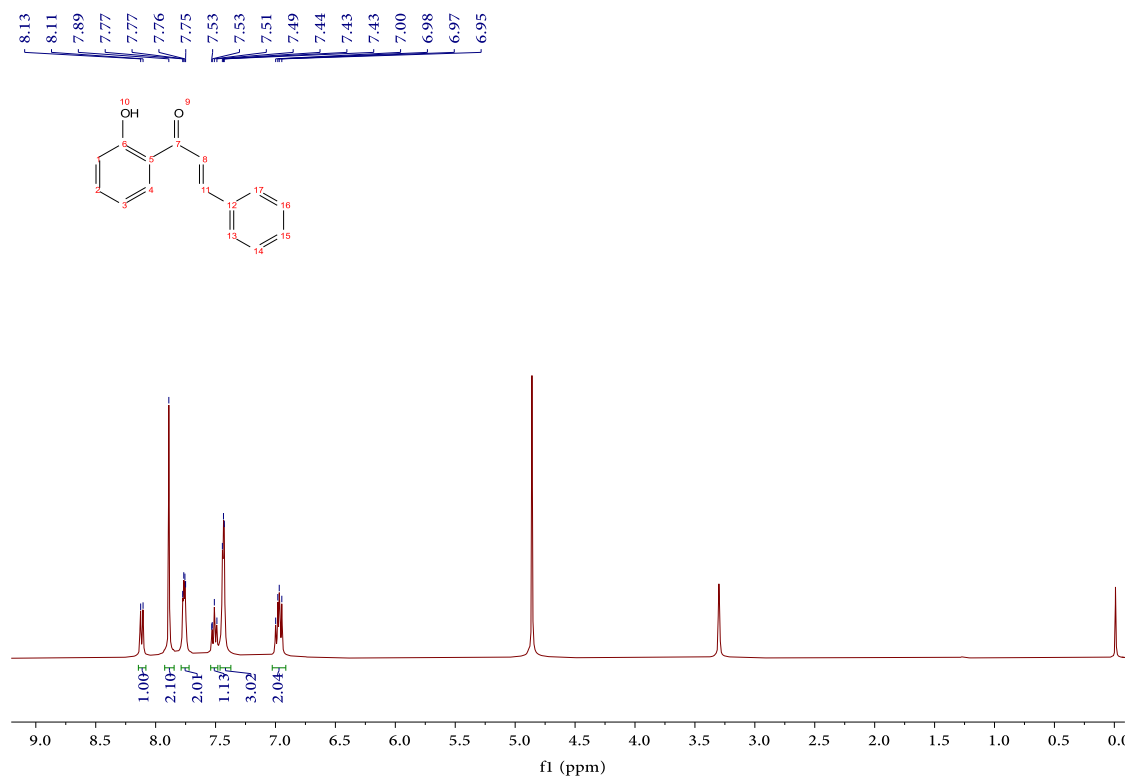

<sup>1</sup>H NMR spectrum of compound **LH-3**

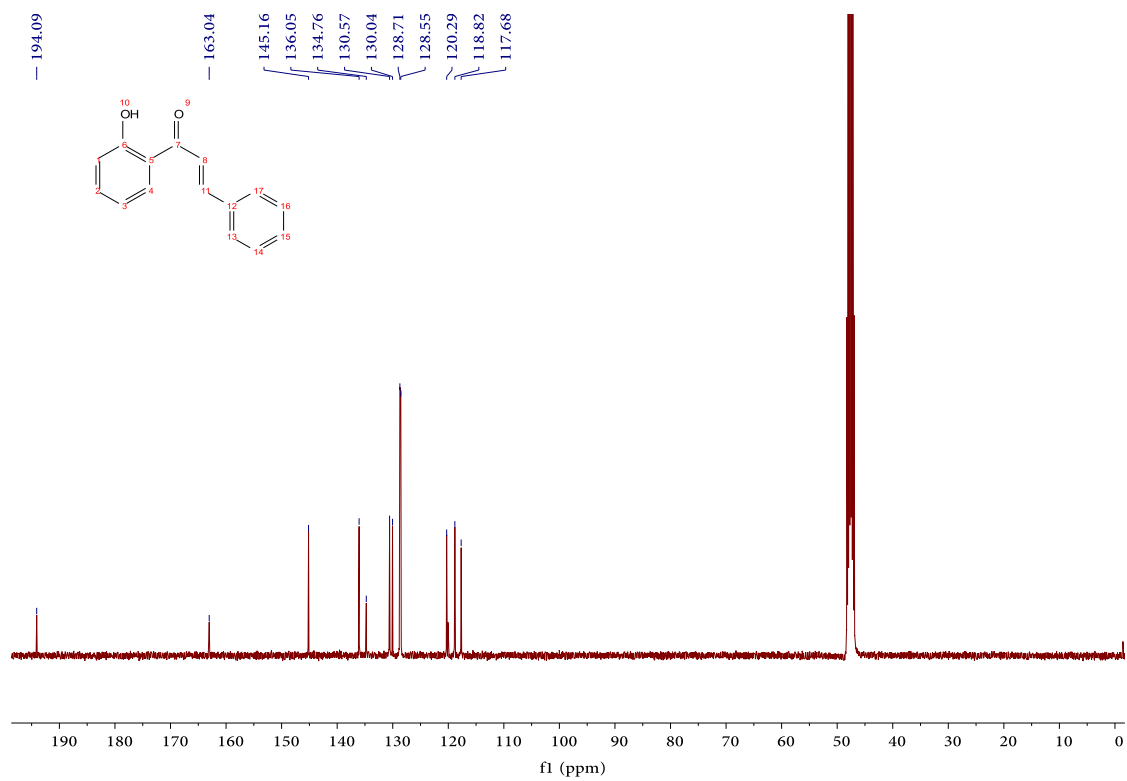

<sup>13</sup>C NMR spectrum of compound **LH-3**

# Generic Display Report

## Analysis Info

Analysis Name D:\Data\yangynew\LIHU200916\_30\_01\_33763.d  
Method POS\_100-1200\_ForLC.m  
Sample Name LIHU200916  
Comment

Acquisition Date 9/16/2020 4:09:39 PM

Operator LZU  
Instrument micrOTOF

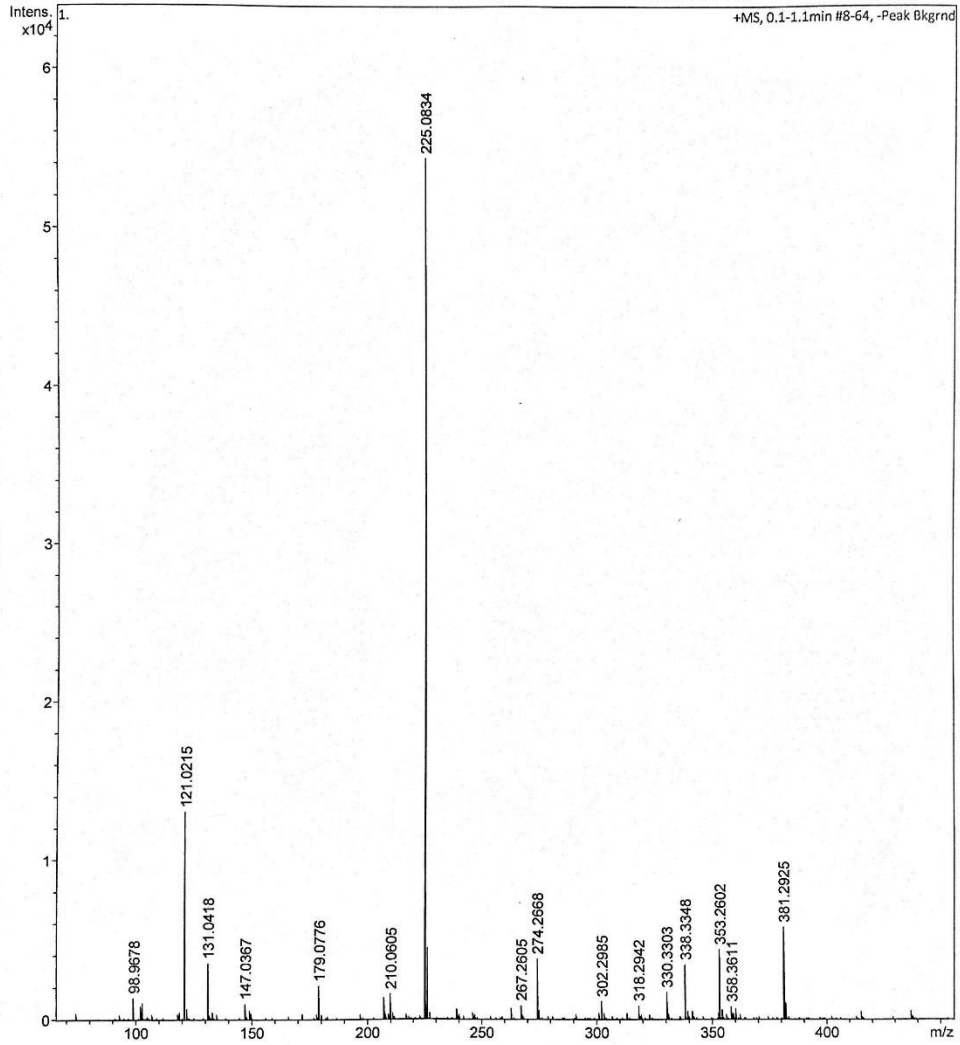

MS (ESI) spectrum of compound **LH-3**

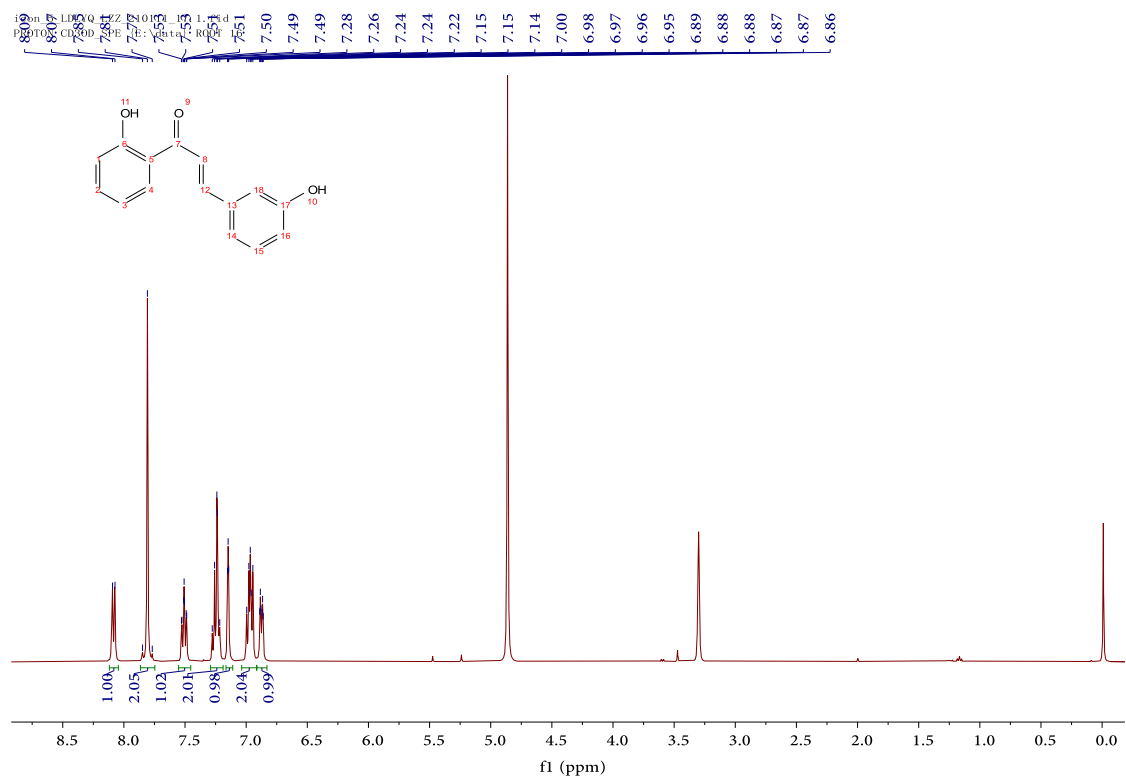

**<sup>1</sup>H NMR spectrum of compound LH-4**

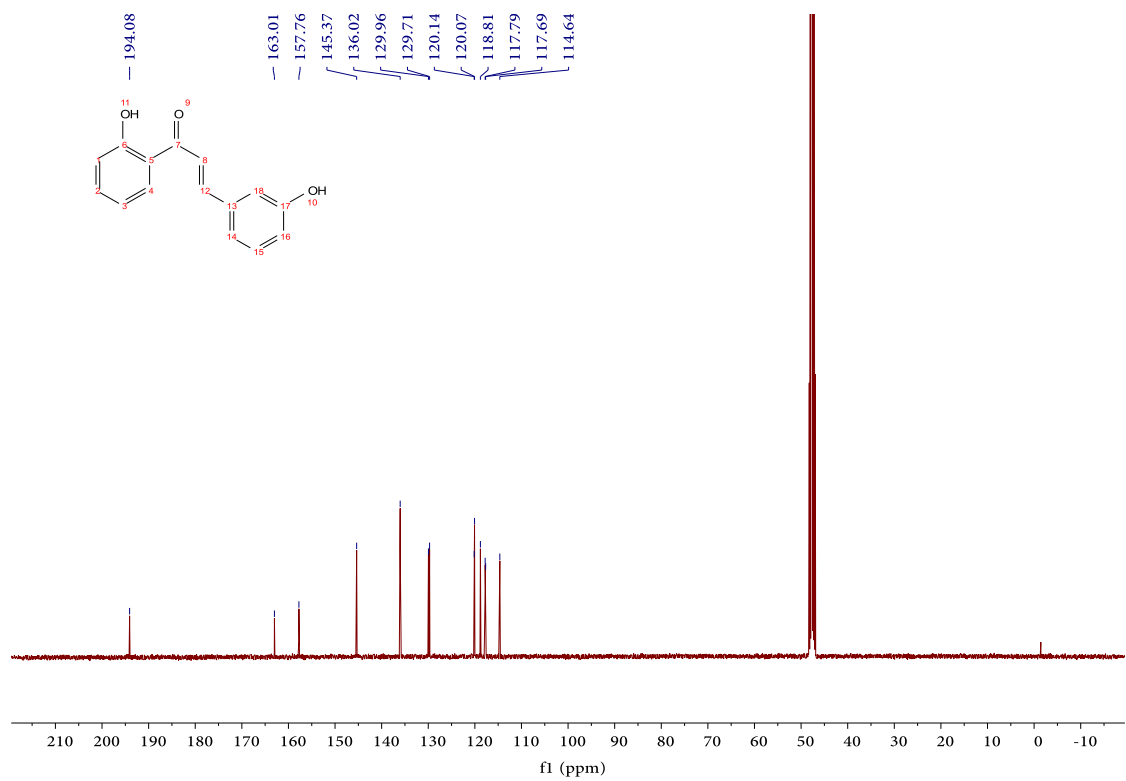

**<sup>13</sup>C NMR spectrum of compound LH-4**



## Generic Display Report

### Analysis Info

Analysis Name D:\Data\yangy\new\LIHU201231\_4\_10\_01\_36594.d  
Method POS\_100-1200\_For LC.m  
Sample Name LIHU201231\_4  
Comment

Acquisition Date 12/31/2020 12:38:17 PM

Operator LZU  
Instrument micrOTOF

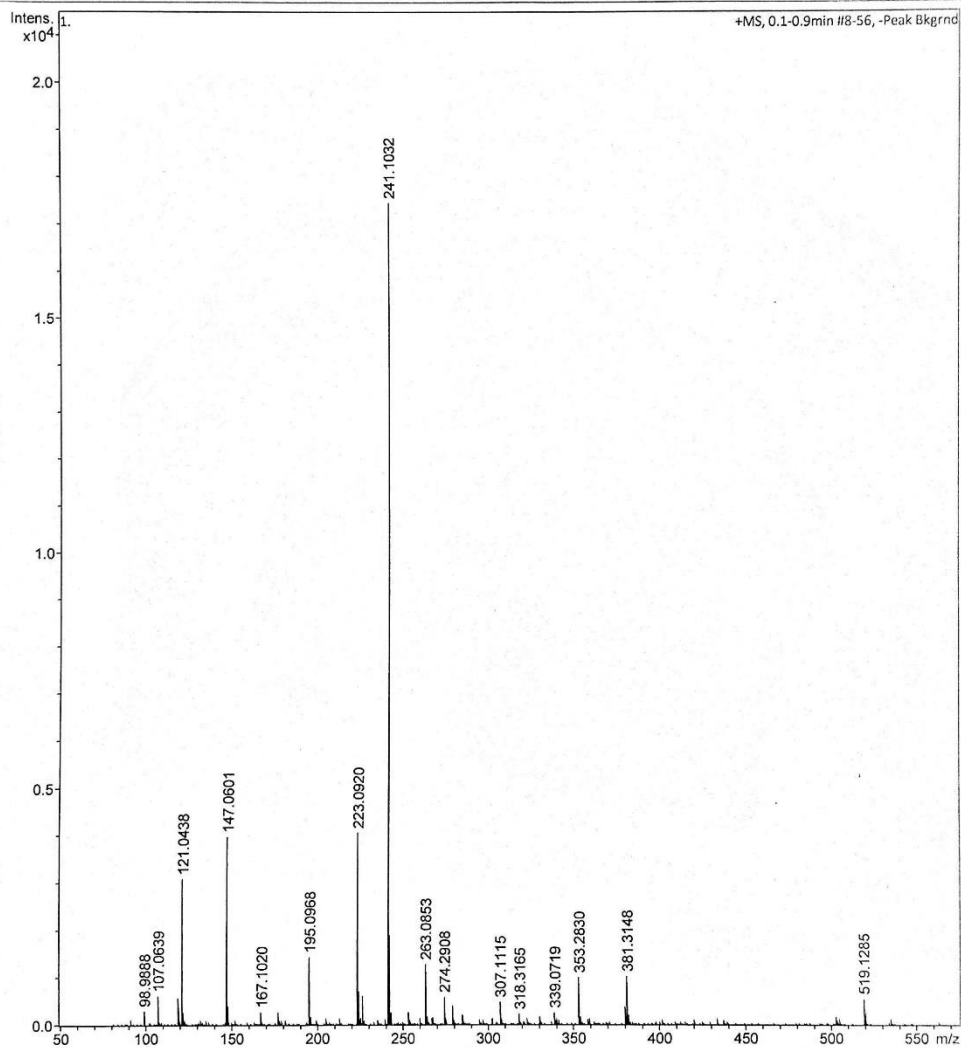

MS (ESI) spectrum of compound **LH-4**

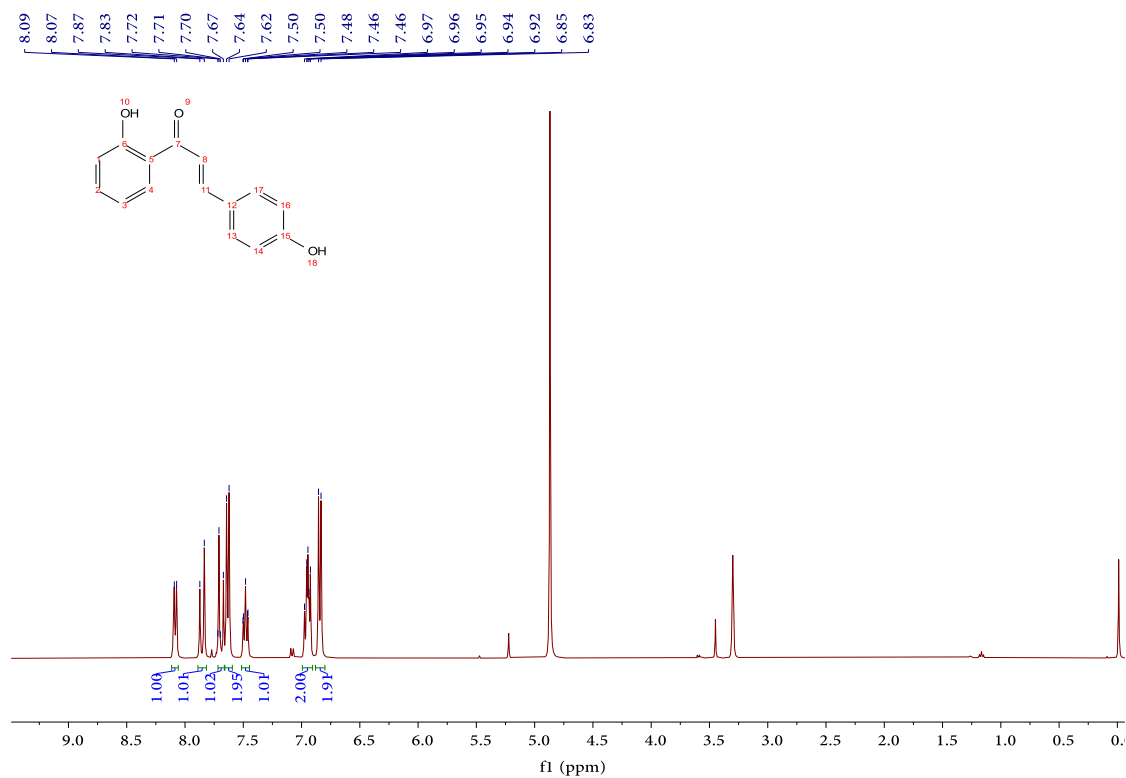

<sup>1</sup>H NMR spectrum of compound **LH-5**

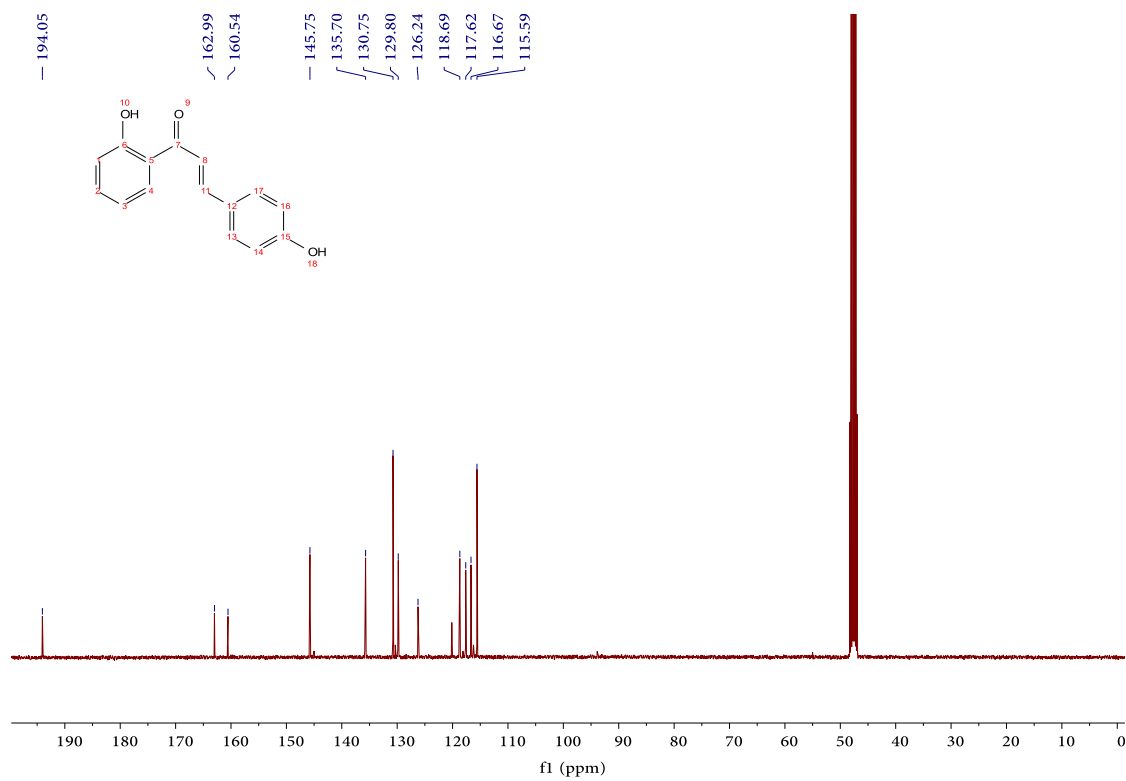

<sup>13</sup>C NMR spectrum of compound **LH-5**

# Generic Display Report

## Analysis Info

Analysis Name D:\Datalyang\new\LIHU210112\_8\_17\_01\_36825.d  
Method POS\_100-1200\_For LC.m  
Sample Name LIHU210112\_8  
Comment

Acquisition Date 1/12/2021 12:49:26 PM

Operator LZU  
Instrument micrOTOF

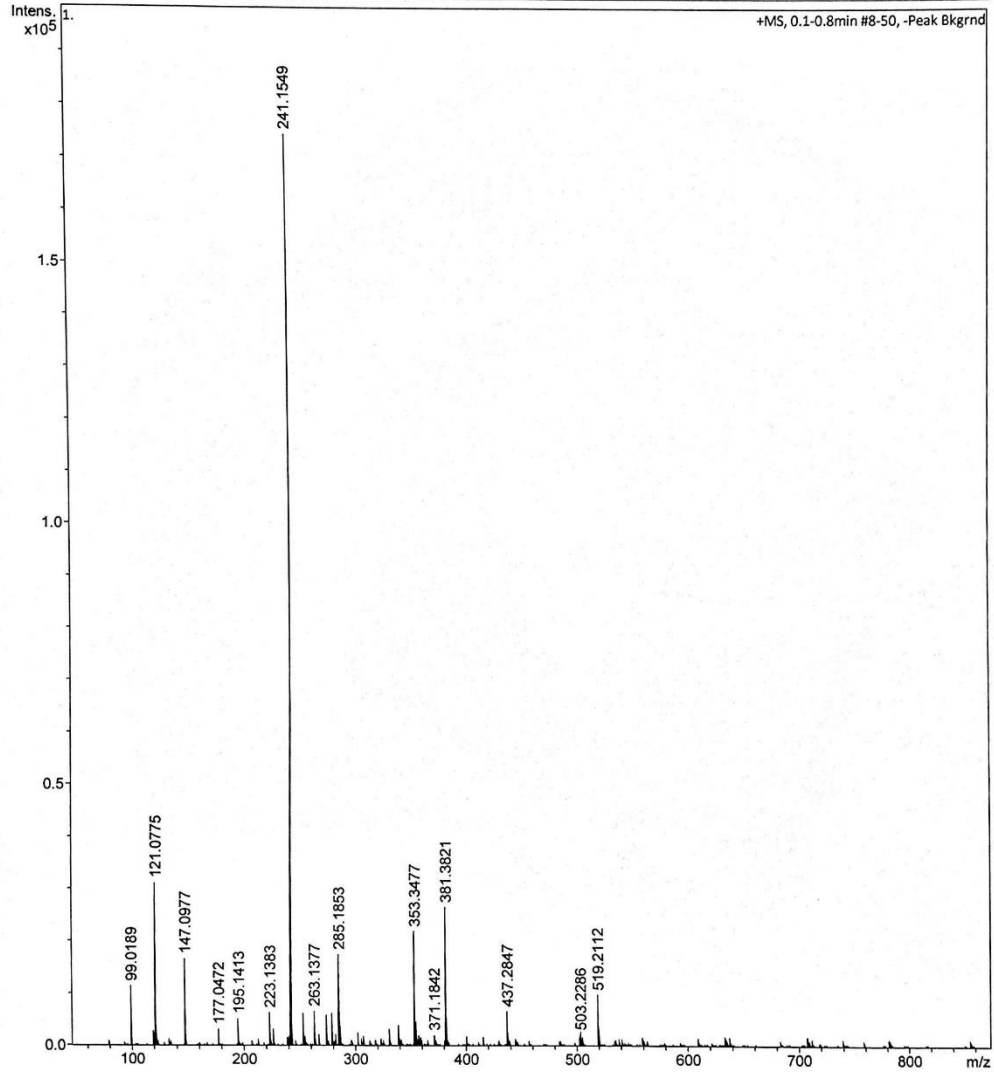

MS (ESI) spectrum of compound **LH-5**

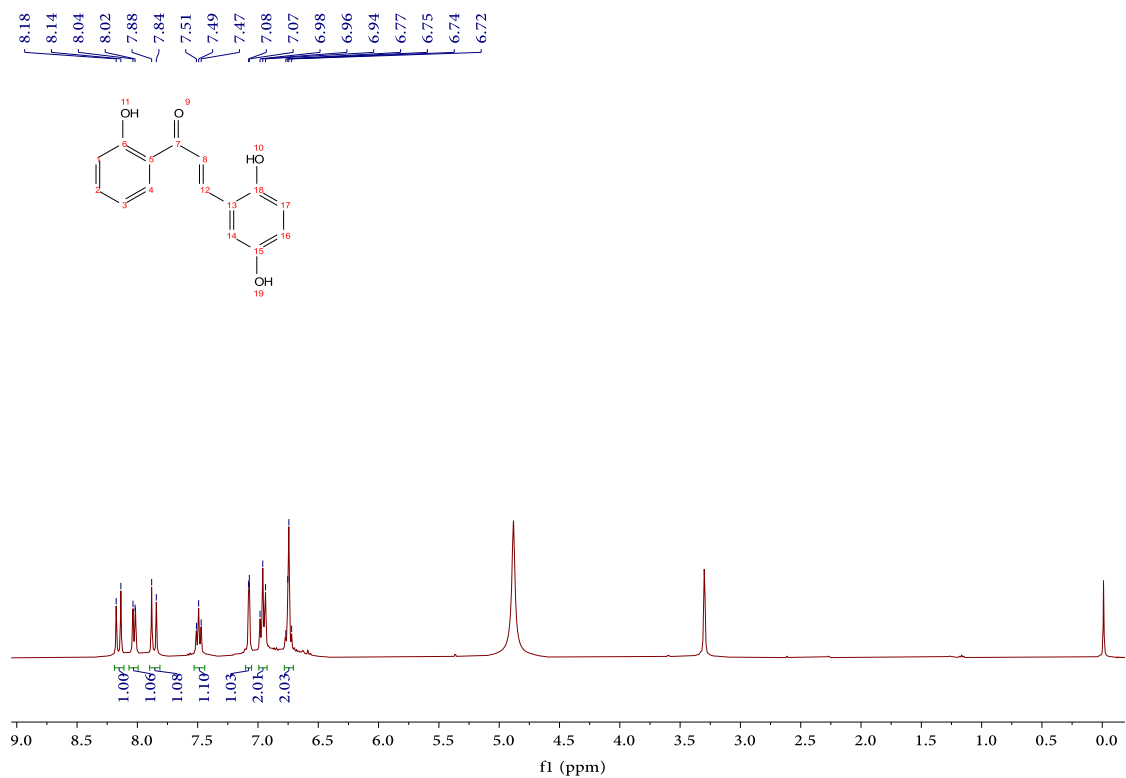

**<sup>1</sup>H NMR spectrum of compound LH-6**

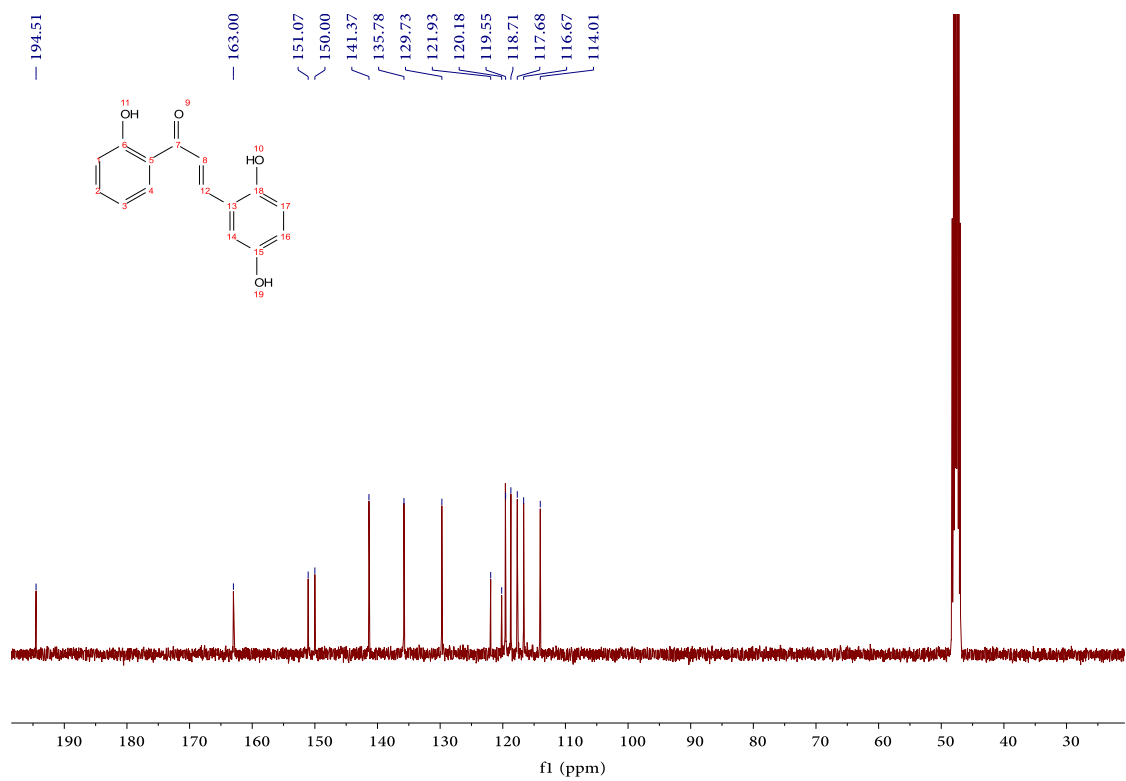

**<sup>13</sup>C NMR spectrum of compound LH-6**

## Generic Display Report

### Analysis Info

Analysis Name D:\Data\yang\new\LIHU200914\_2\_35\_01\_33680.d  
Method NEG\_100-1200\_For LC.m  
Sample Name LIHU200914\_2  
Comment

Acquisition Date 9/14/2020 2:08:01 PM

Operator LZU  
Instrument micrOTOF

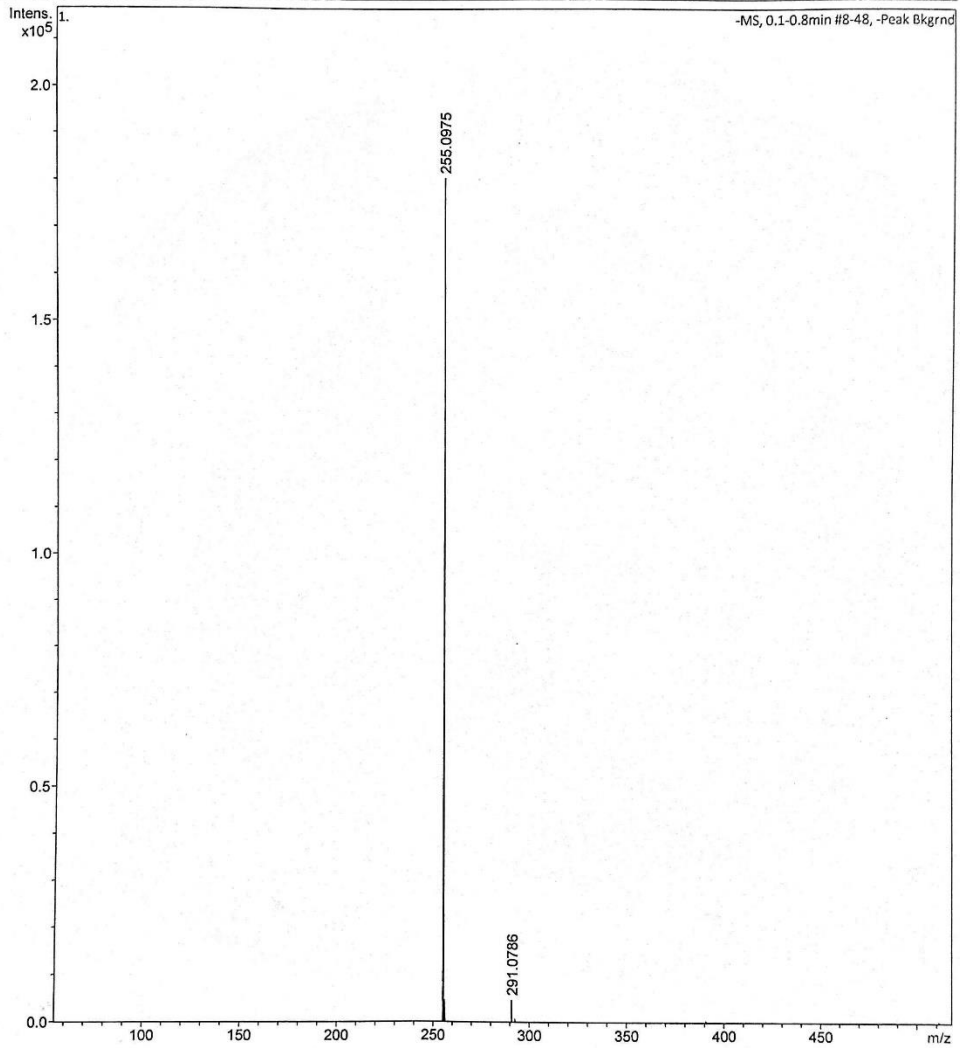

MS (ESI) spectrum of compound **LH-6**

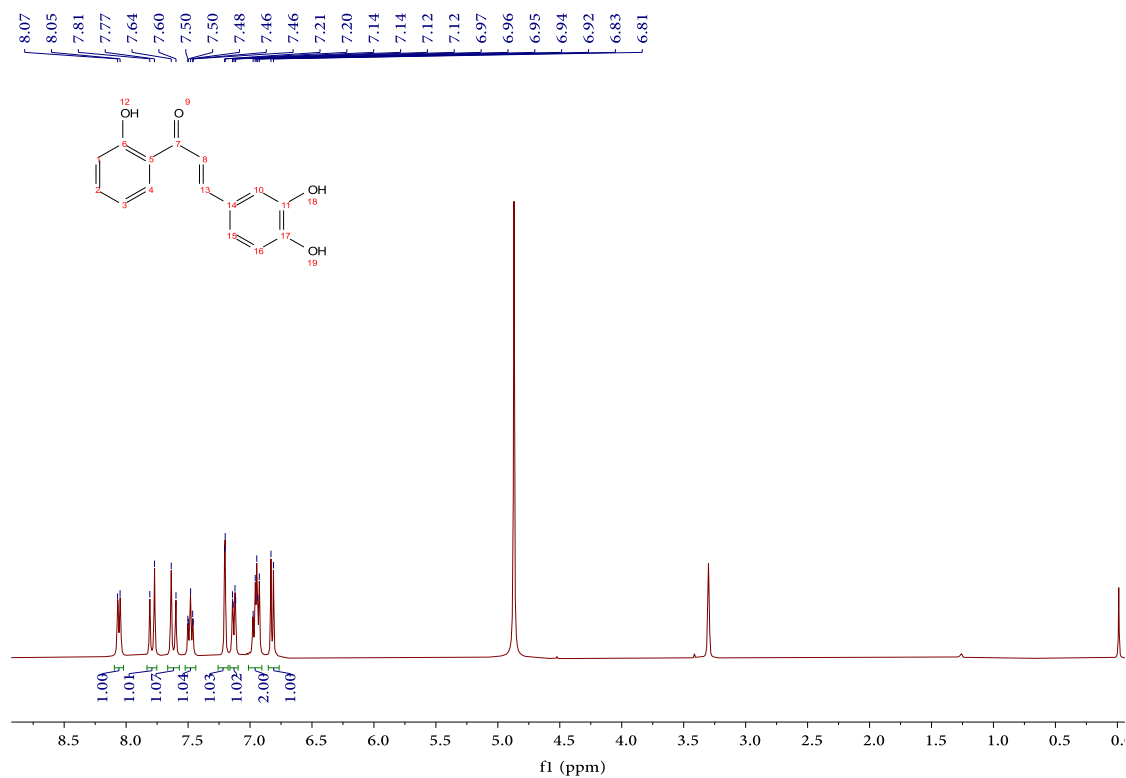

<sup>1</sup>H NMR spectrum of compound LH-7

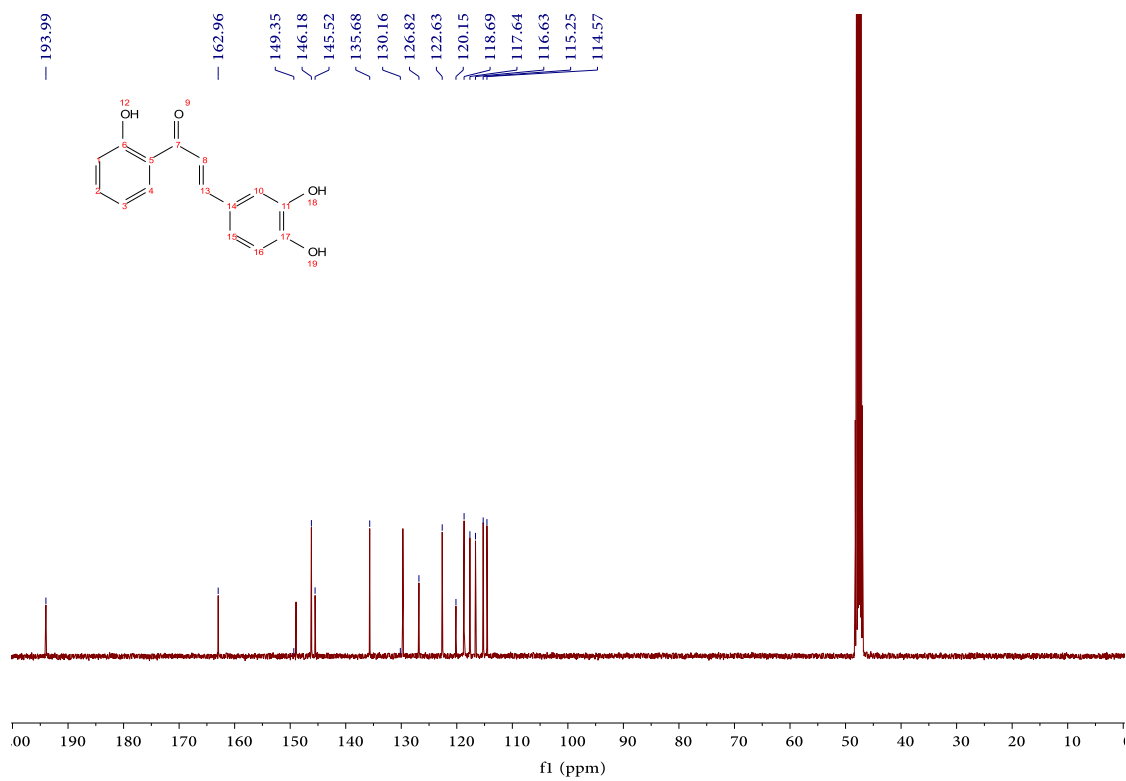

<sup>13</sup>C NMR spectrum of compound LH-7

## Generic Display Report

### Analysis Info

Analysis Name D:\Data\yang\new\LIHU200915\_3\_42\_01\_33726.d  
Method NEG\_100-1200\_For LC.m  
Sample Name LIHU200915\_3  
Comment

Acquisition Date 9/15/2020 2:10:50 PM

Operator LZU  
Instrument micrOTOF

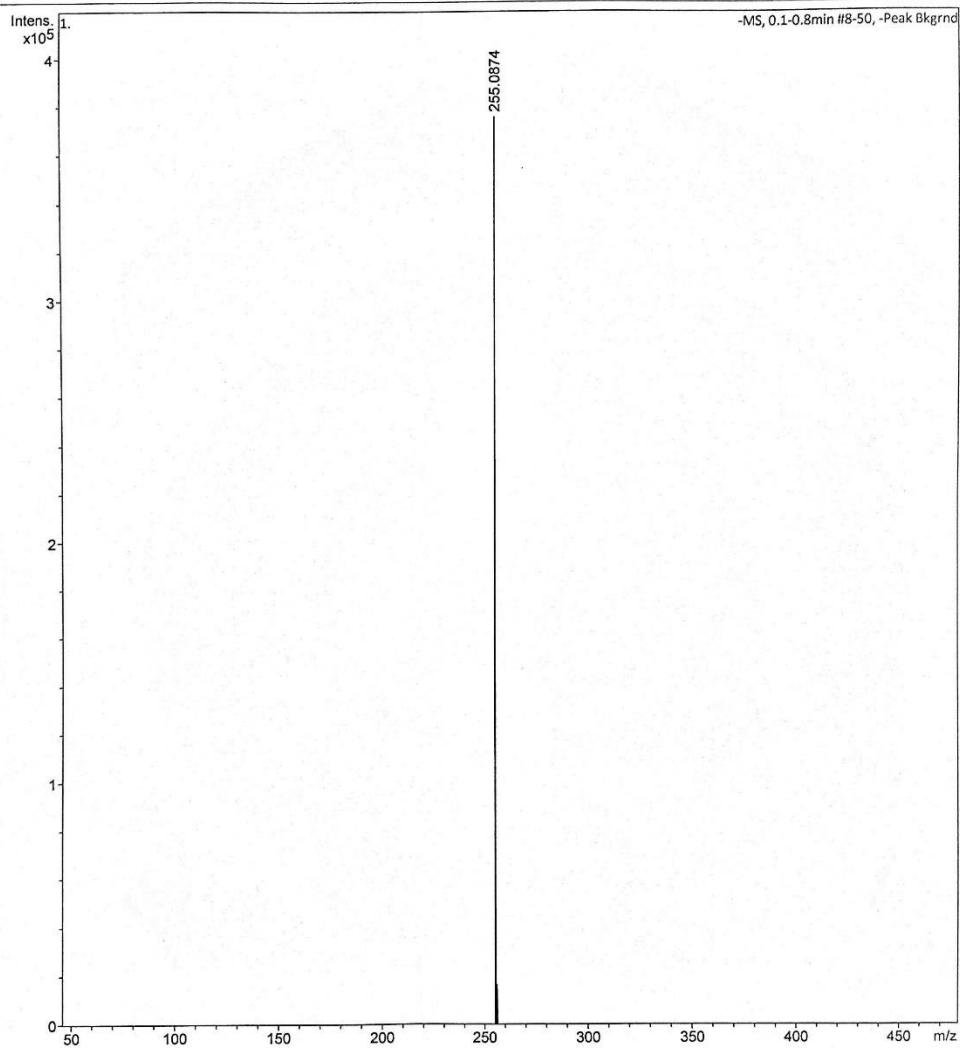

MS (ESI) spectrum of compound **LH-7**

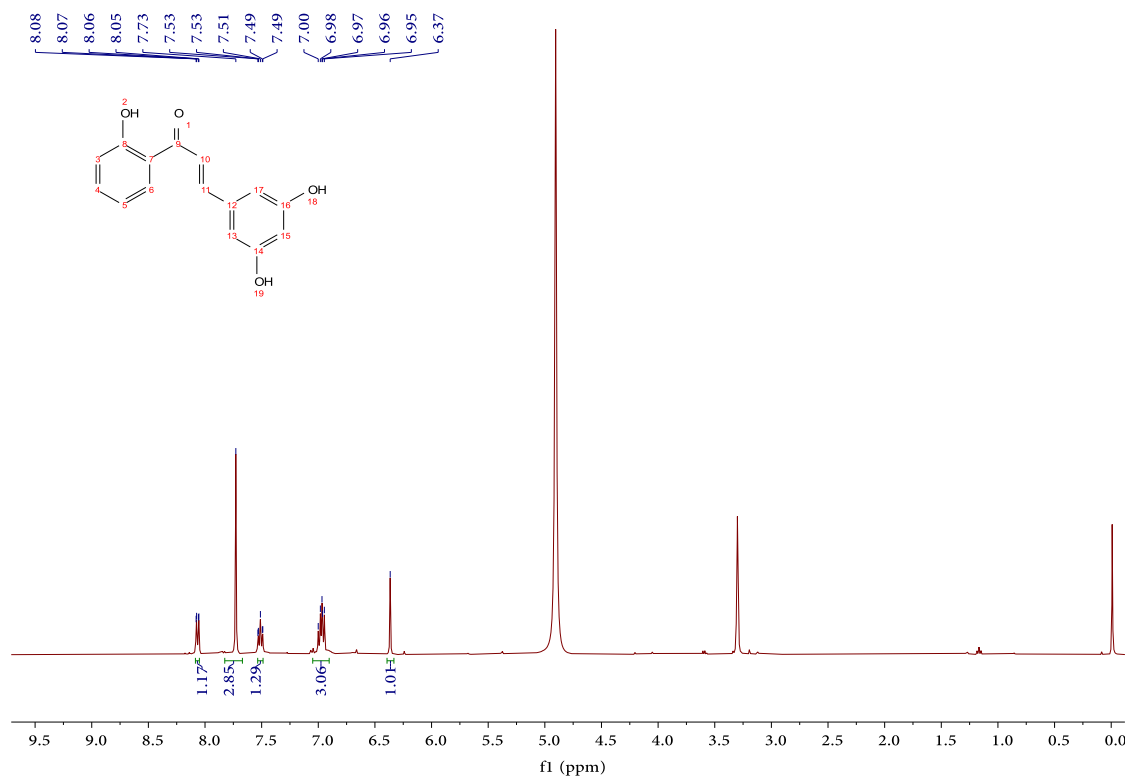

<sup>1</sup>H NMR spectrum of compound LH-8

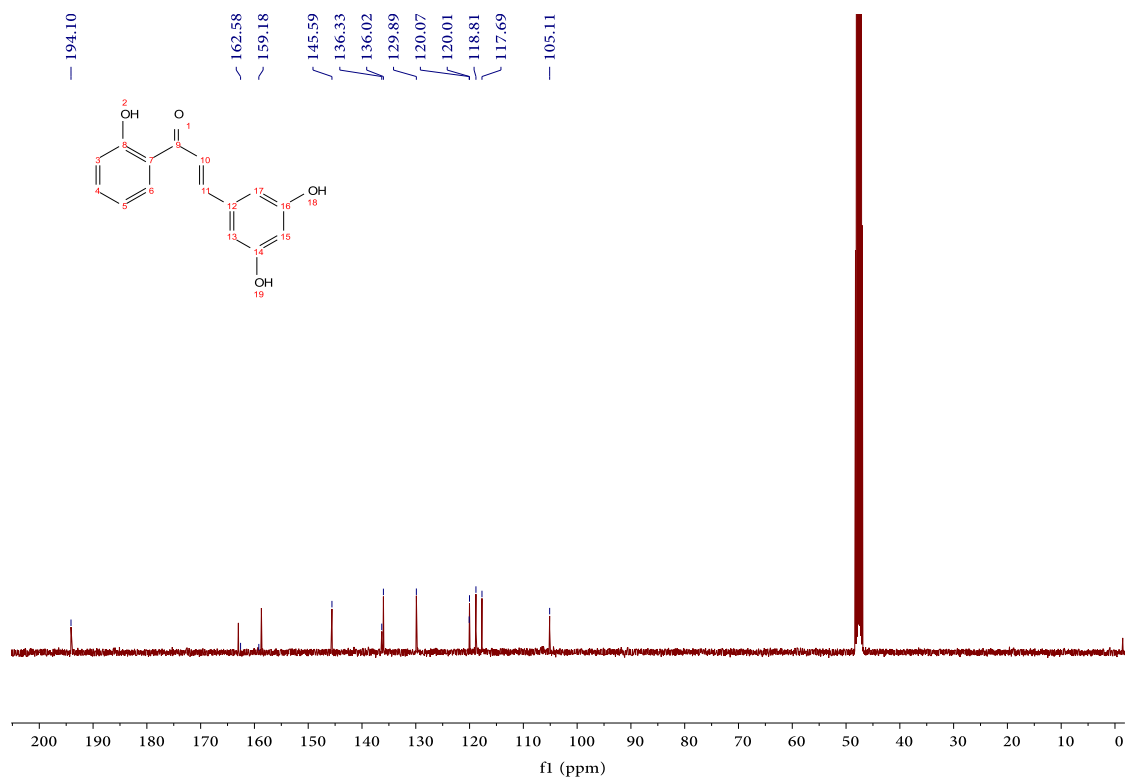

<sup>13</sup>C NMR spectrum of compound LH-8



# Generic Display Report

## Analysis Info

Analysis Name D:\Data\yangyinew\LIHU210112\_9\_18\_01\_36826.d  
Method POS\_100-1200\_For LC.m  
Sample Name LIHU210112\_9  
Comment

Acquisition Date 1/12/2021 12:52:32 PM

Operator LZU  
Instrument micrOTOF

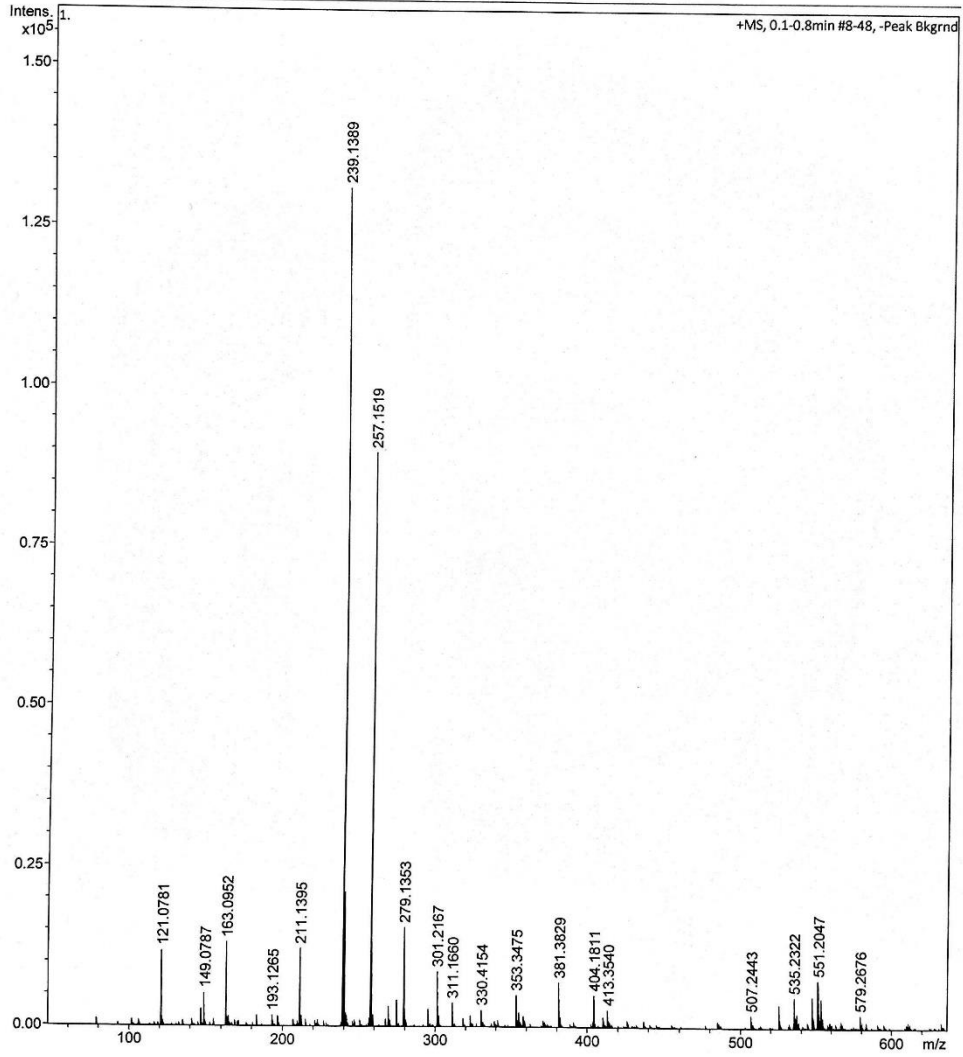

MS (ESI) spectrum of compound **LH-8**

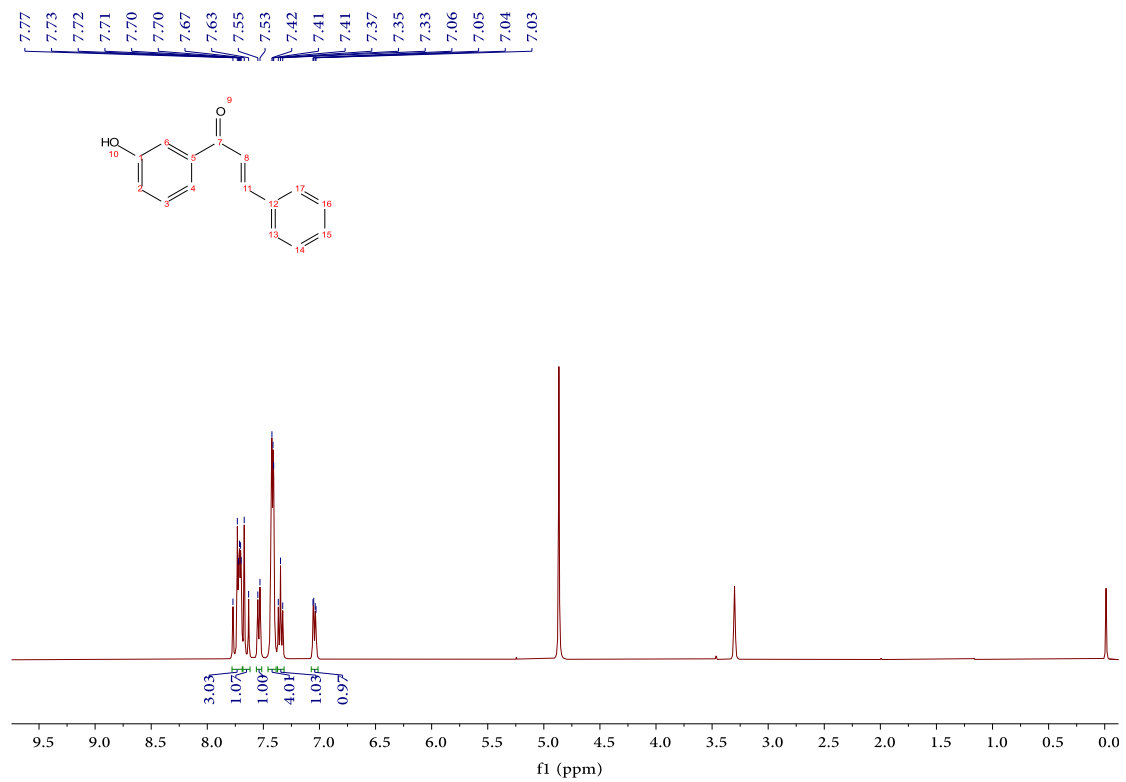

<sup>1</sup>H NMR spectrum of compound **LH-9**

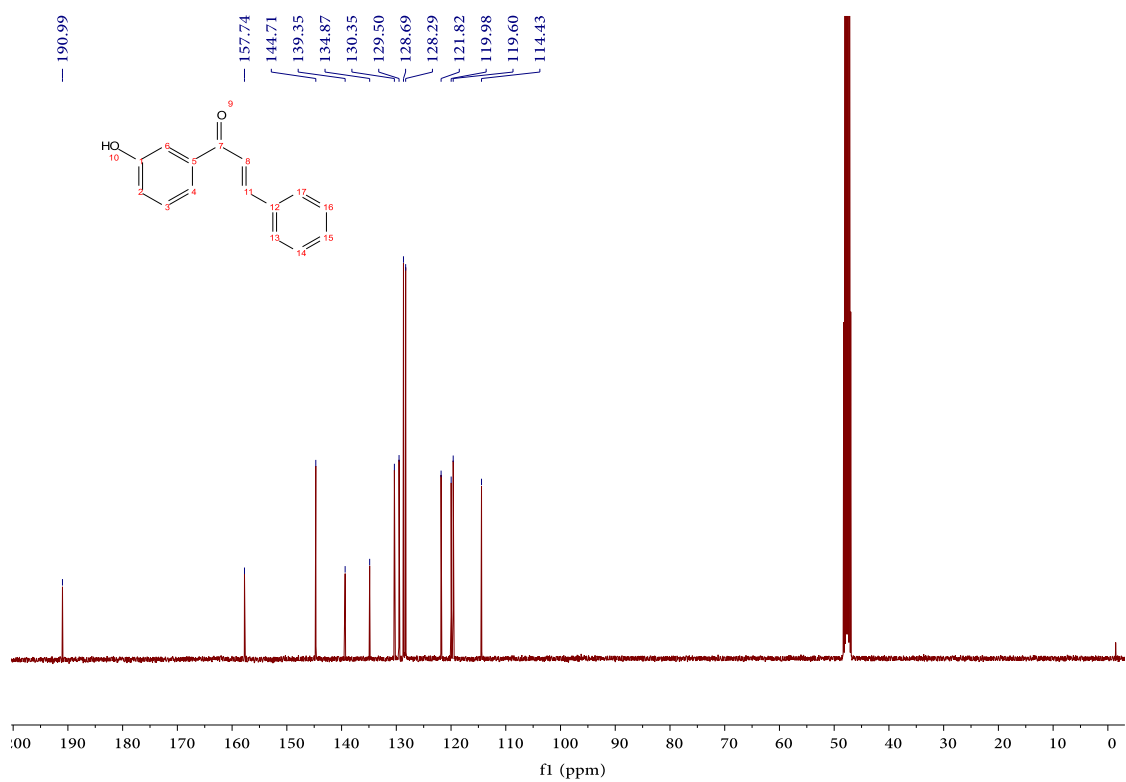

<sup>13</sup>C NMR spectrum of compound **LH-9**

# Generic Display Report

## Analysis Info

Analysis Name D:\Data\yangy\new\LIHU210111\_1\_19\_01\_36748.d  
Method POS\_100-1200\_For LC.m  
Sample Name LIHU210111\_1  
Comment

Acquisition Date 1/11/2021 12:51:46 PM

Operator LZU  
Instrument micrOTOF

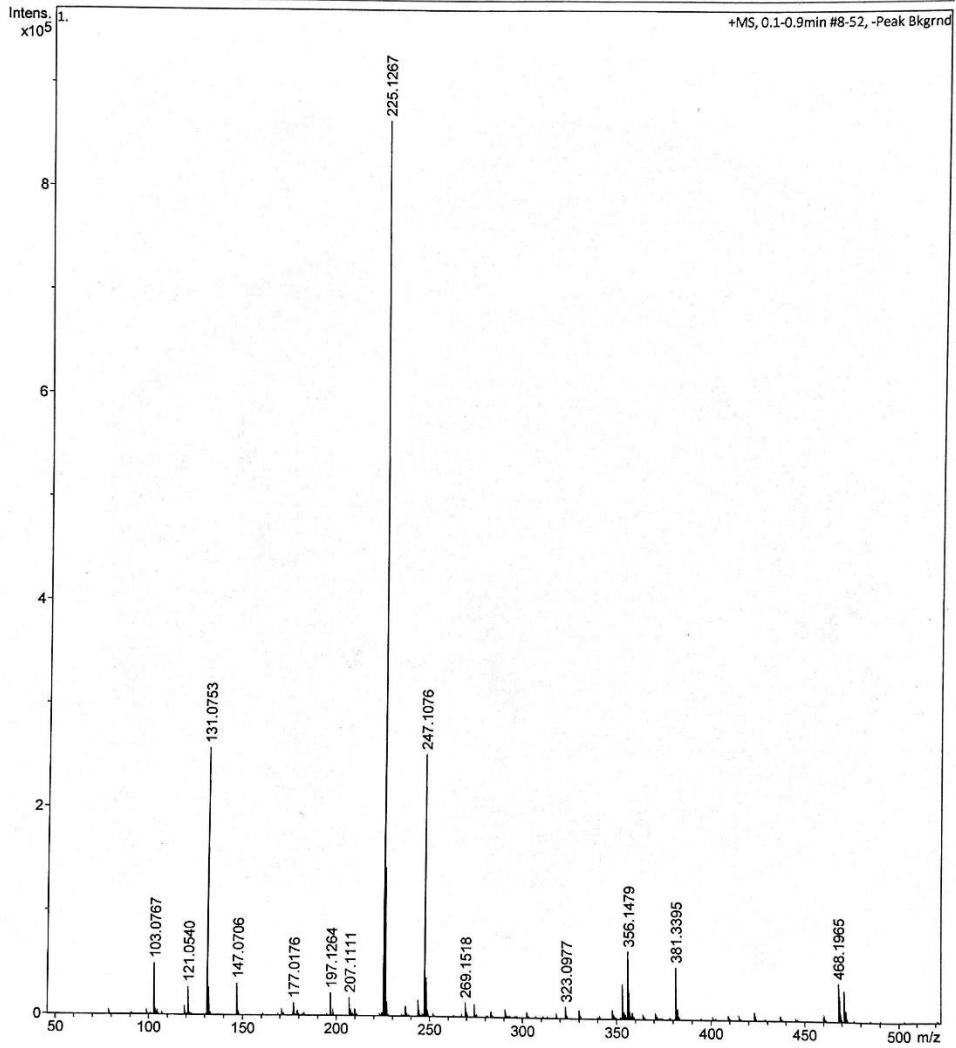

MS (ESI) spectrum of compound **LH-9**

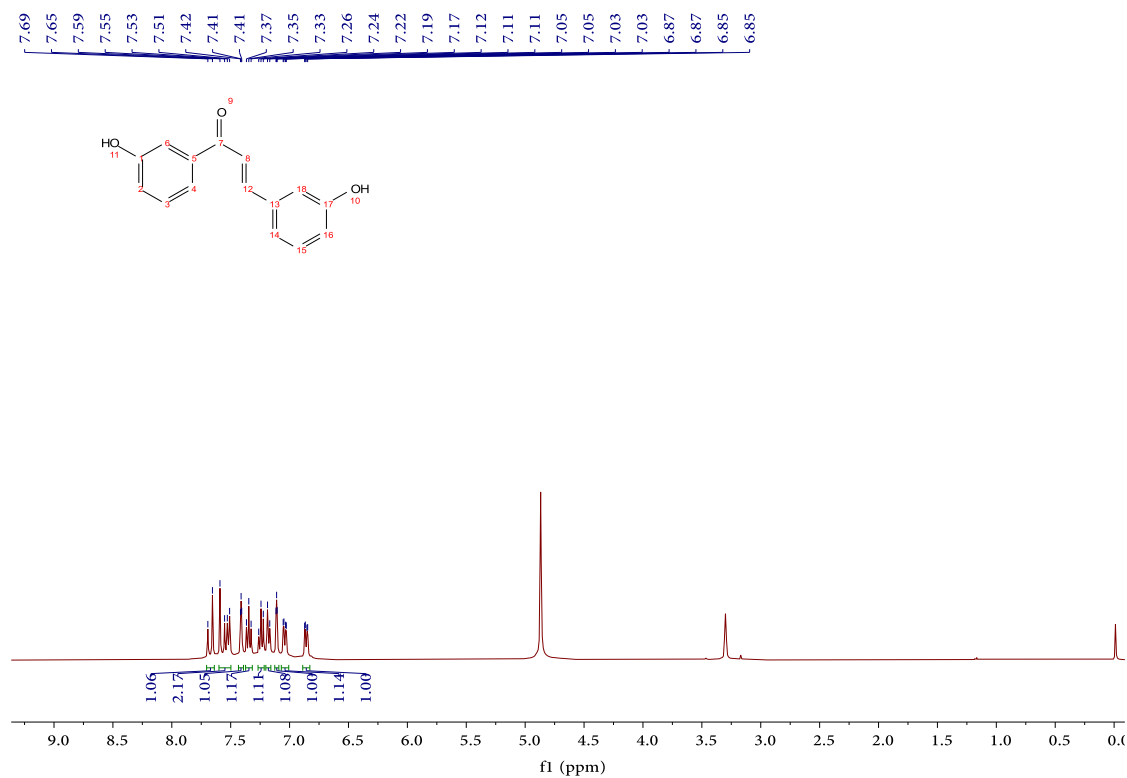

$^1\text{H NMR}$  spectrum of compound LH-10

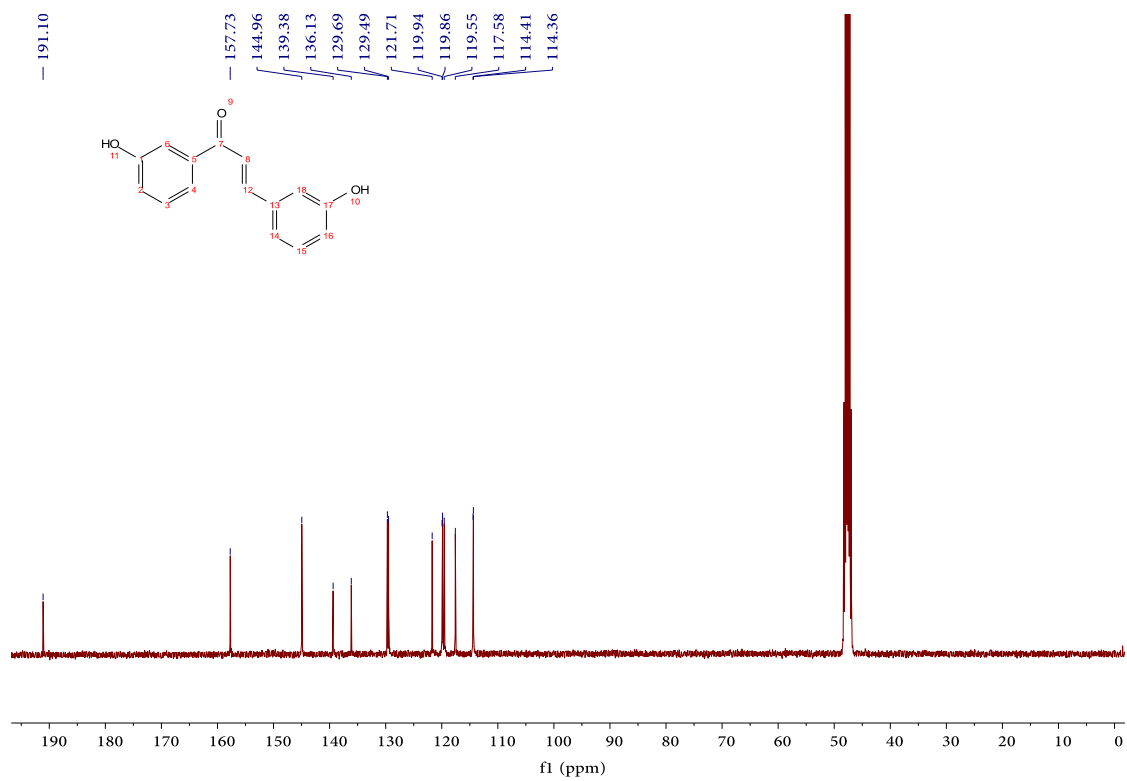

$^{13}\text{C NMR}$  spectrum of compound LH-10

# Generic Display Report

## Analysis Info

Analysis Name D:\Data\yangy\new\LIHU210111\_6\_24\_01\_36753.d  
Method POS\_100-1200\_For LC.m  
Sample Name LIHU210111\_6  
Comment

Acquisition Date 1/11/2021 1:07:13 PM

Operator LZU  
Instrument micrOTOF

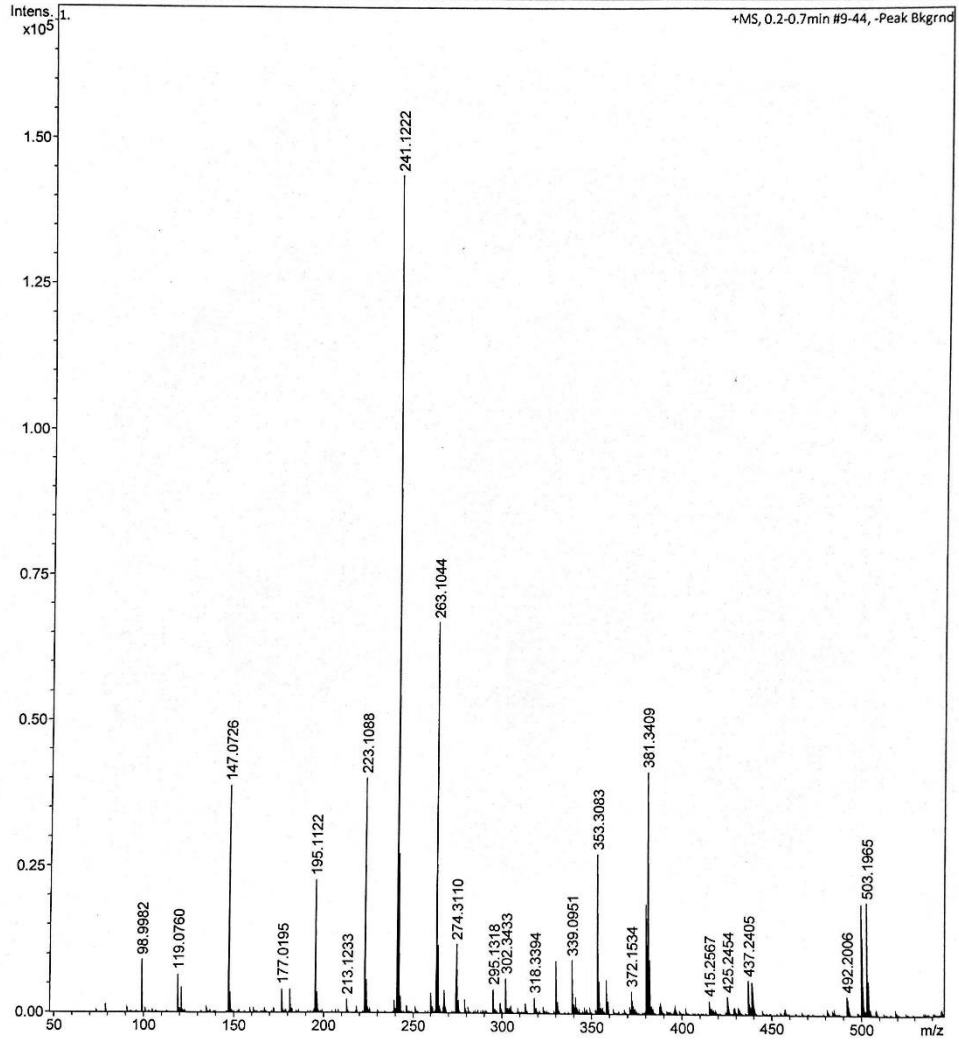

MS (ESI) spectrum of compound **LH-10**

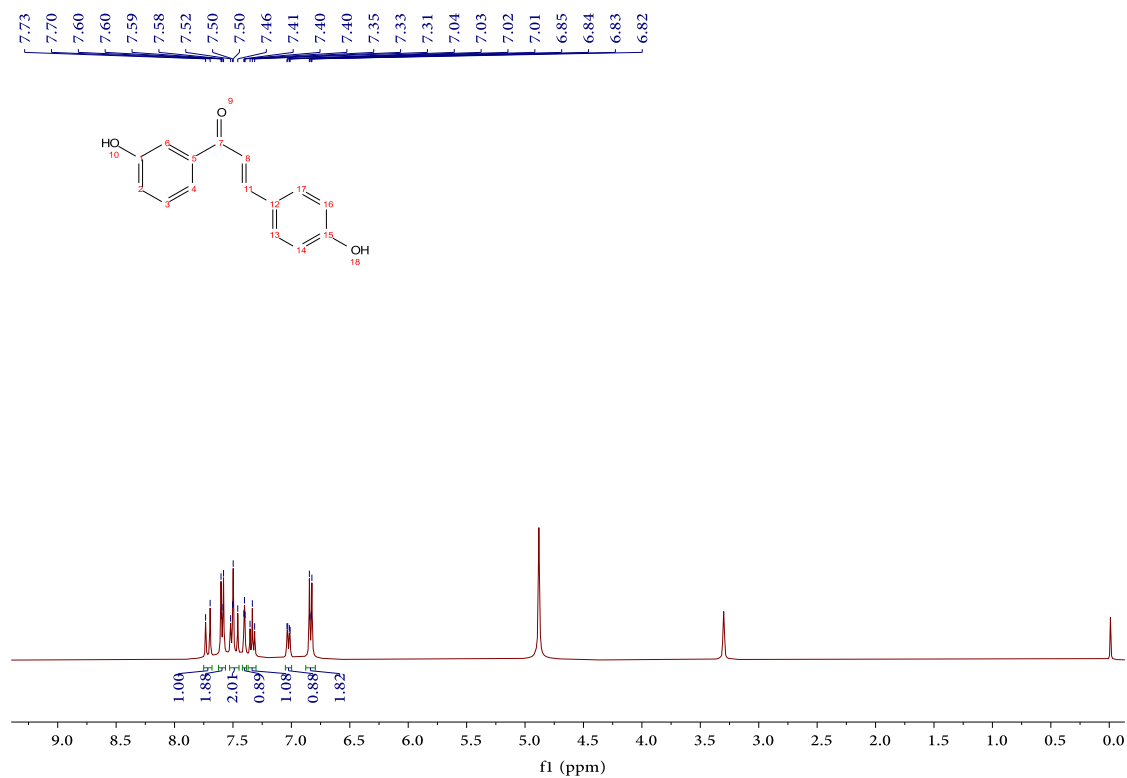

<sup>1</sup>H NMR spectrum of compound LH-11

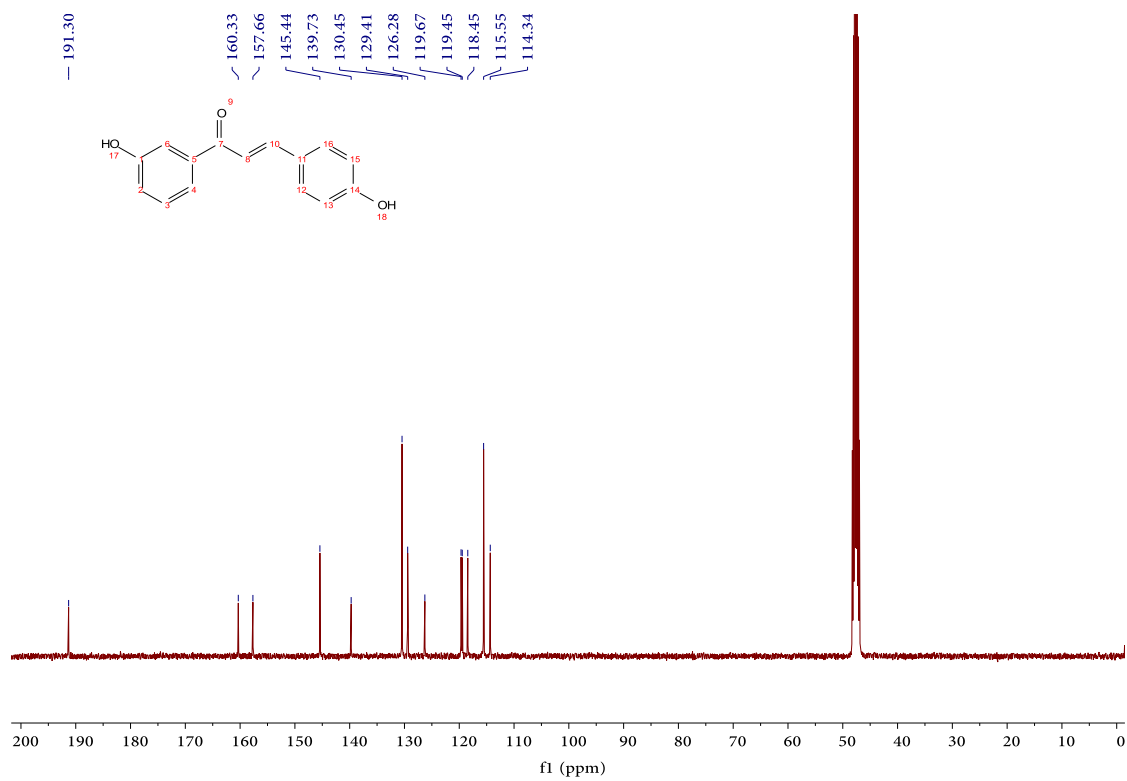

<sup>13</sup>C NMR spectrum of compound LH-11

## Generic Display Report

### Analysis Info

Analysis Name D:\Data\yangy\new\LIHU210111\_4\_22\_01\_36751.d  
Method POS\_100-1200\_For LC.m  
Sample Name LIHU210111\_4  
Comment

Acquisition Date 1/11/2021 1:01:02 PM

Operator LZU  
Instrument micrOTOF

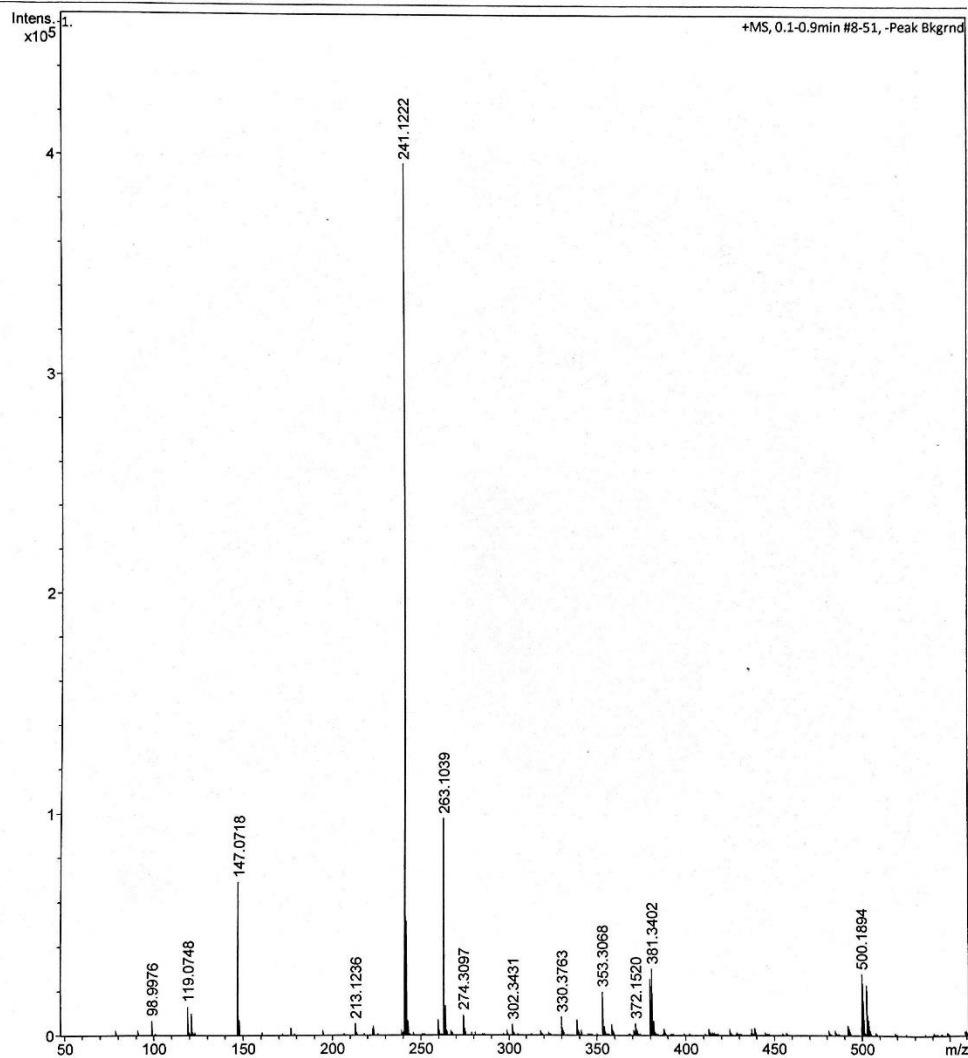

MS (ESI) spectrum of compound **LH-11**

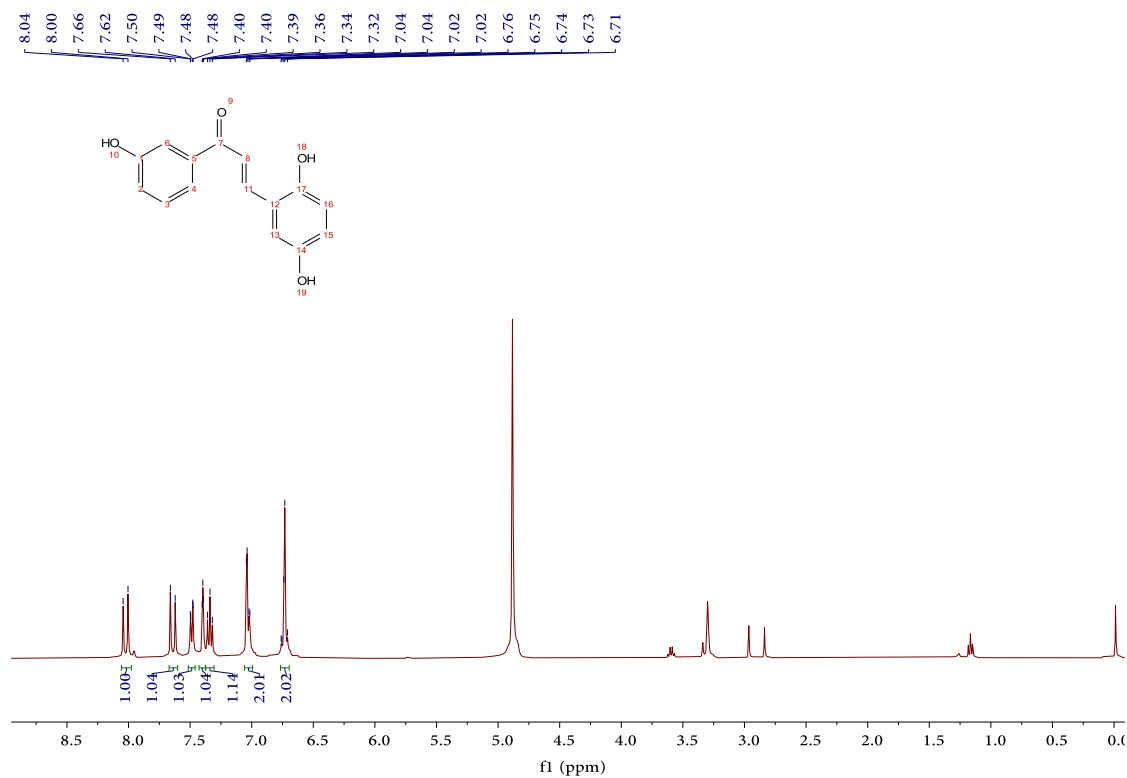

<sup>1</sup>H NMR spectrum of compound LH-12

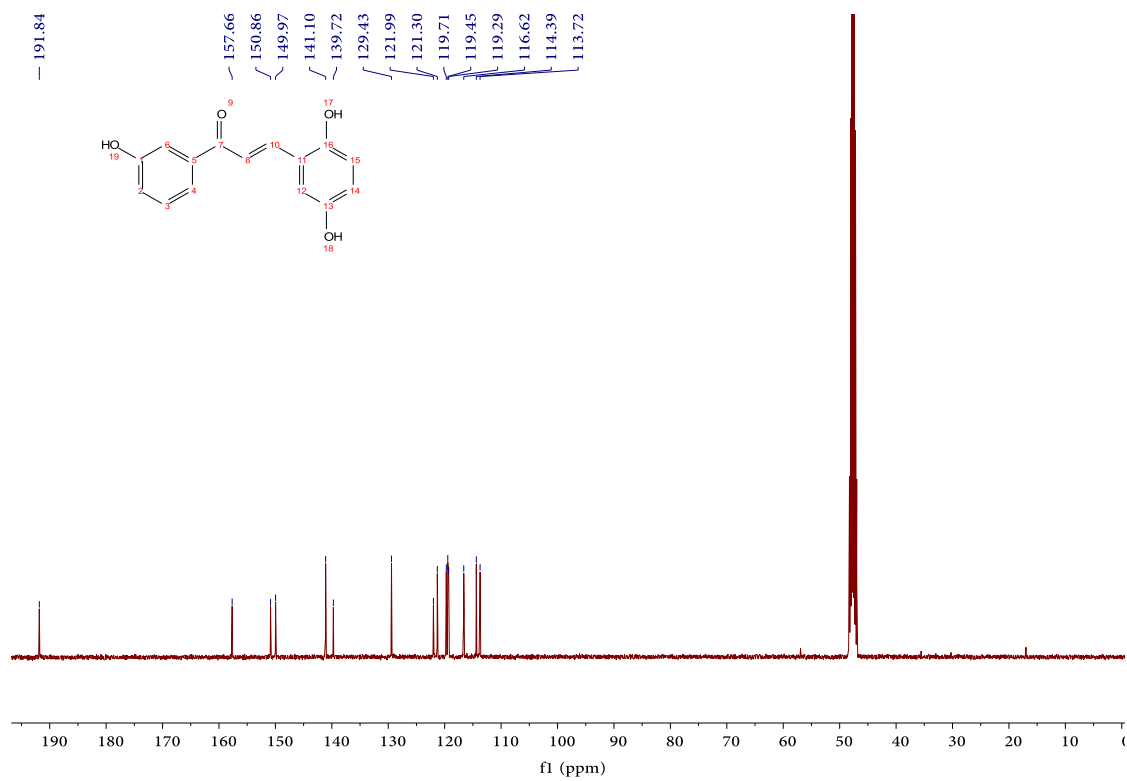

<sup>13</sup>C NMR spectrum of compound LH-12



## Generic Display Report

### Analysis Info

Analysis Name D:\Data\yangy\new\LIHU210111\_2\_20\_01\_36749.d  
Method POS\_100-1200\_For LC.m  
Sample Name LIHU210111\_2  
Comment

Acquisition Date 1/11/2021 12:54:52 PM

Operator LZU  
Instrument micrOTOF

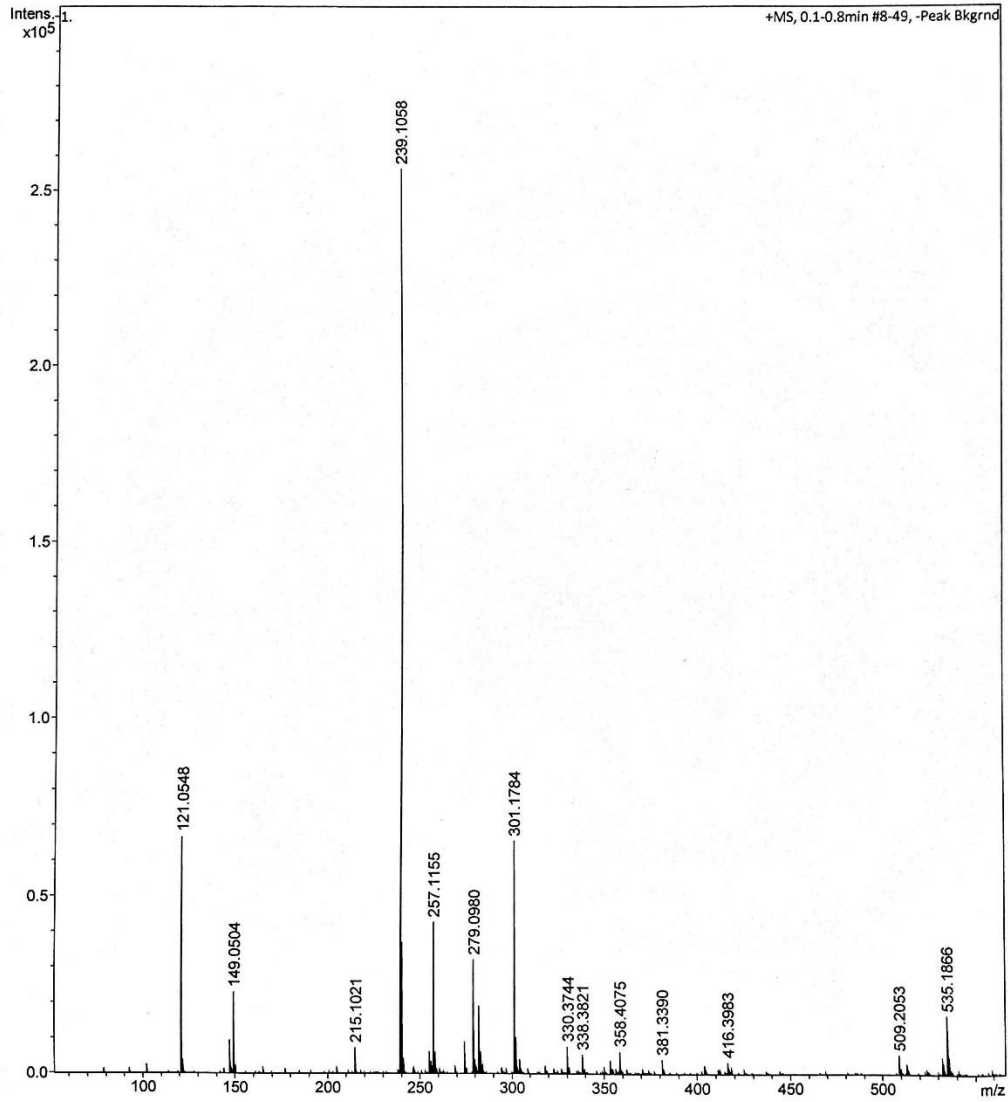

MS (ESI) spectrum of **LH-12**

compound

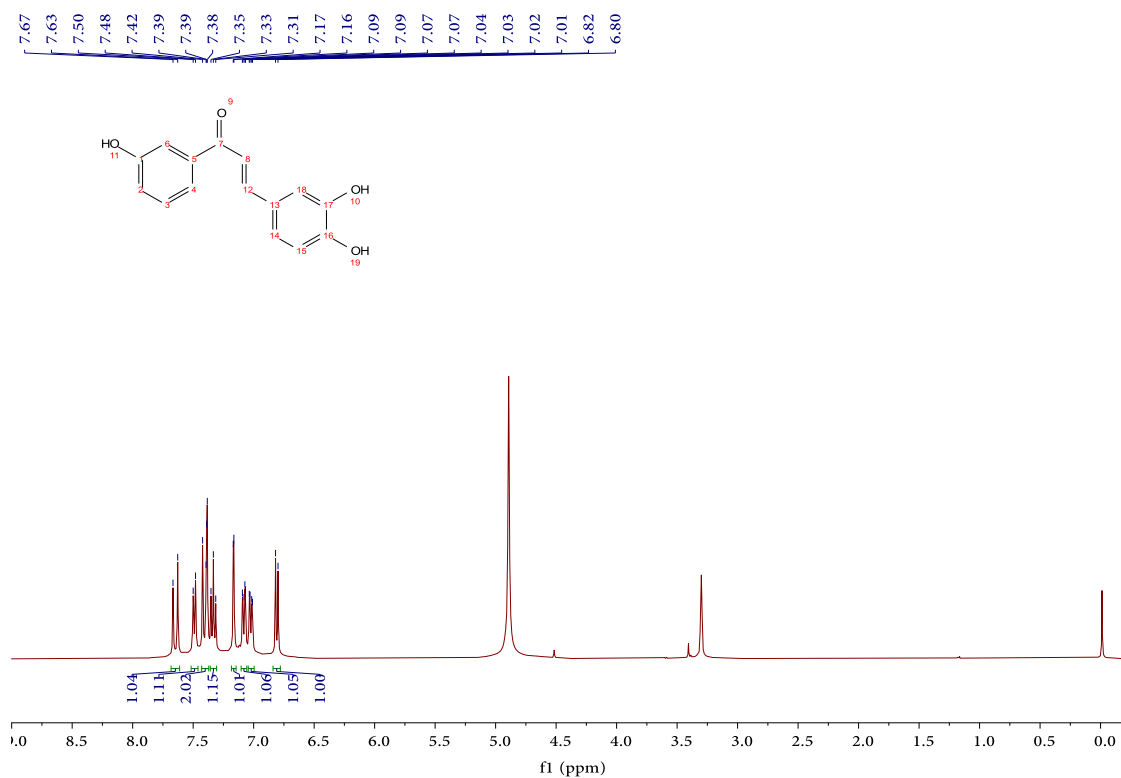

<sup>1</sup>H NMR spectrum of compound LH-13

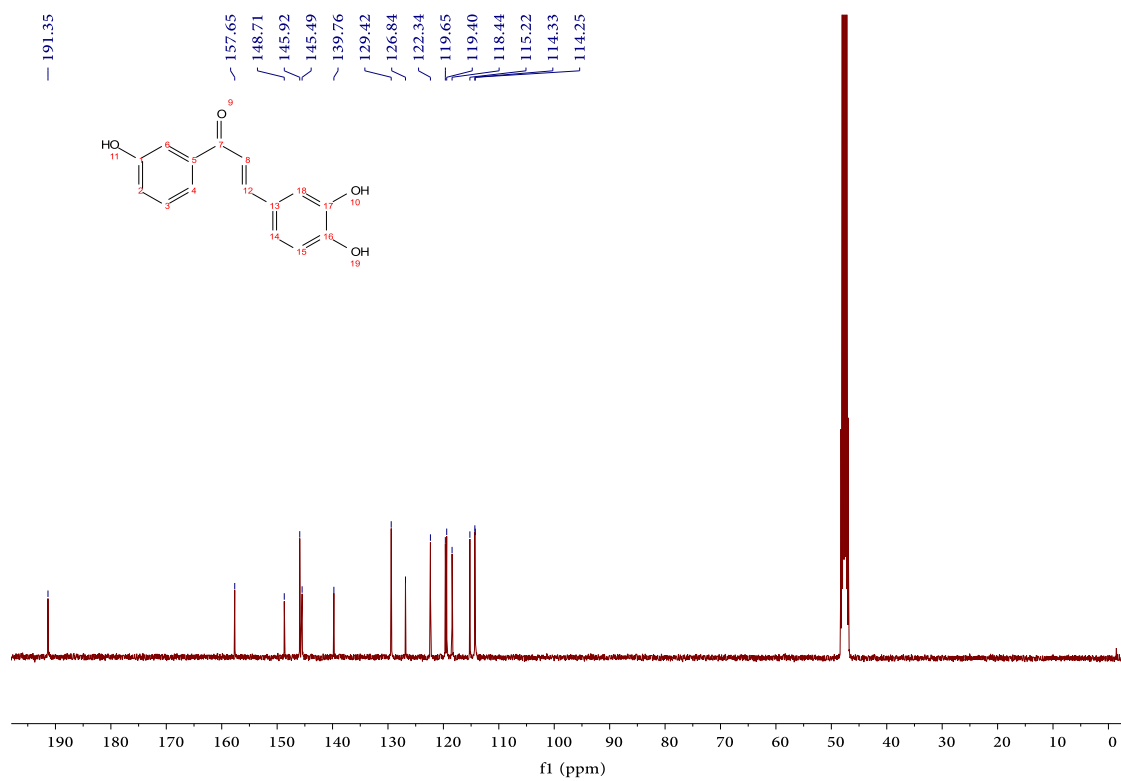

<sup>13</sup>C NMR spectrum of compound **LH-13**

Generic Display Report

|                      |                                              |                  |                      |
|----------------------|----------------------------------------------|------------------|----------------------|
| <b>Analysis Info</b> |                                              | Acquisition Date | 1/11/2021 1:04:07 PM |
| Analysis Name        | D:\Data\yangy\new\LIHU210111_5_23_01_36752.d | Operator         | LZU                  |
| Method               | POS_100-1200_For LC.m                        | Instrument       | micrOTOF             |
| Sample Name          | LIHU210111_5                                 |                  |                      |
| Comment              |                                              |                  |                      |

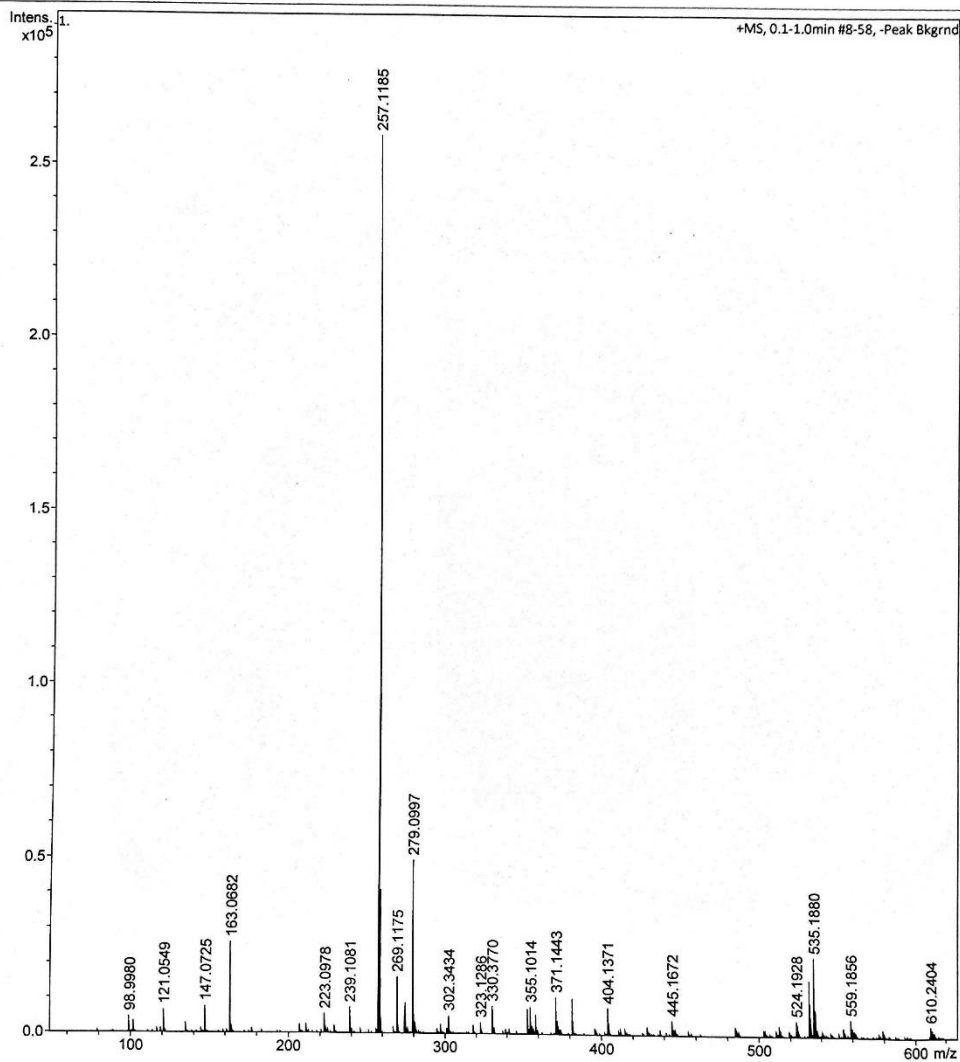

MS (ESI) spectrum of compound **LH-13**

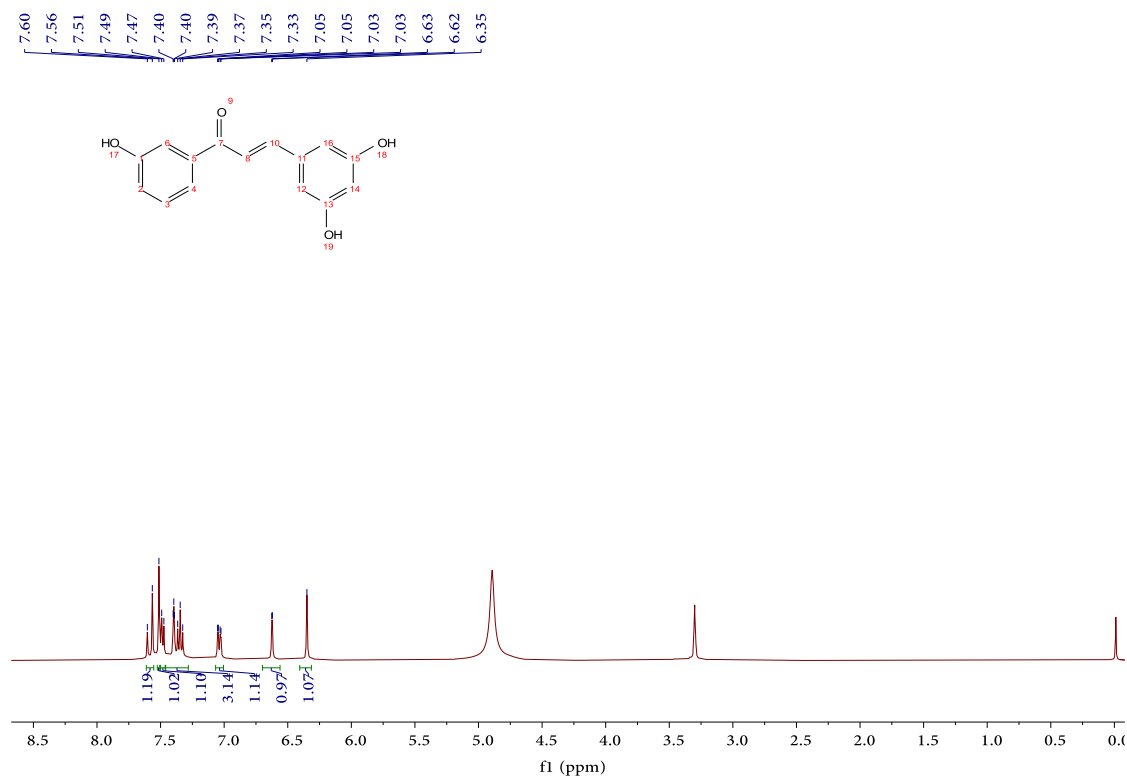

<sup>1</sup>H NMR spectrum of compound LH-14

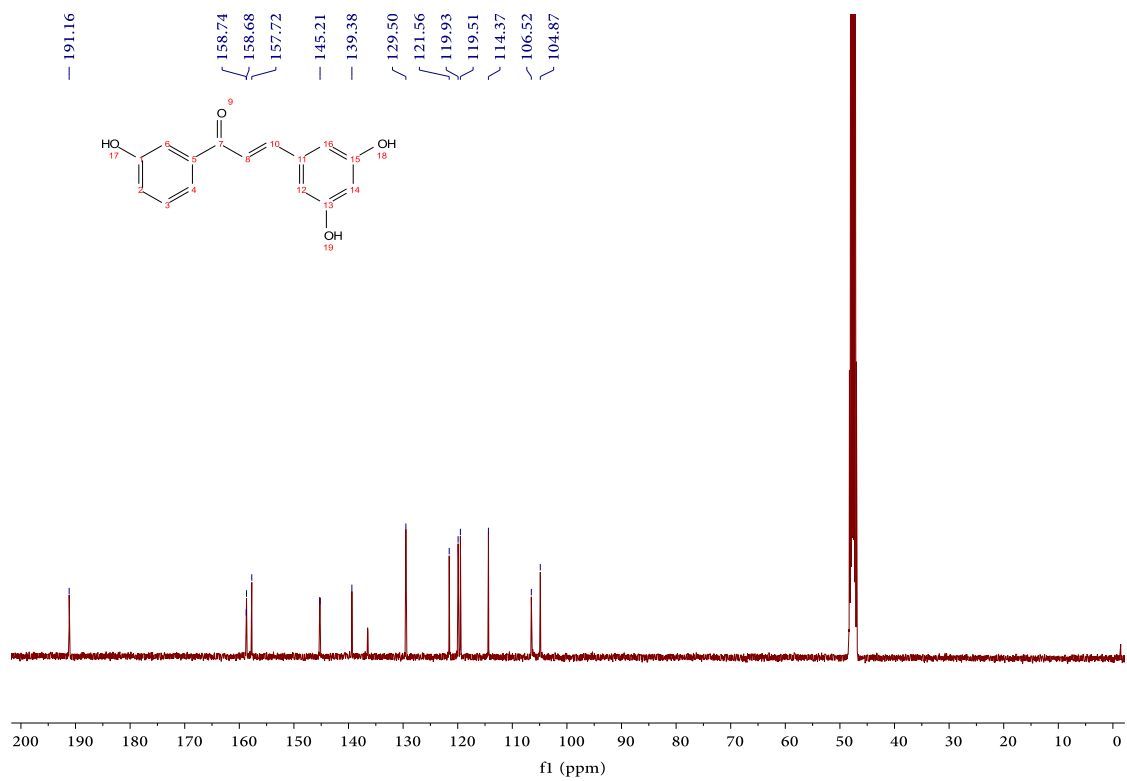

<sup>13</sup>C NMR spectrum of compound LH-14

# Generic Display Report

## Analysis Info

Analysis Name D:\Data\yangy\new\LIHU210111\_3\_21\_01\_36750.d  
Method POS\_100-1200\_For LC.m  
Sample Name LIHU210111\_3  
Comment

Acquisition Date 1/11/2021 12:57:59 PM

Operator LZU  
Instrument micrOTOF

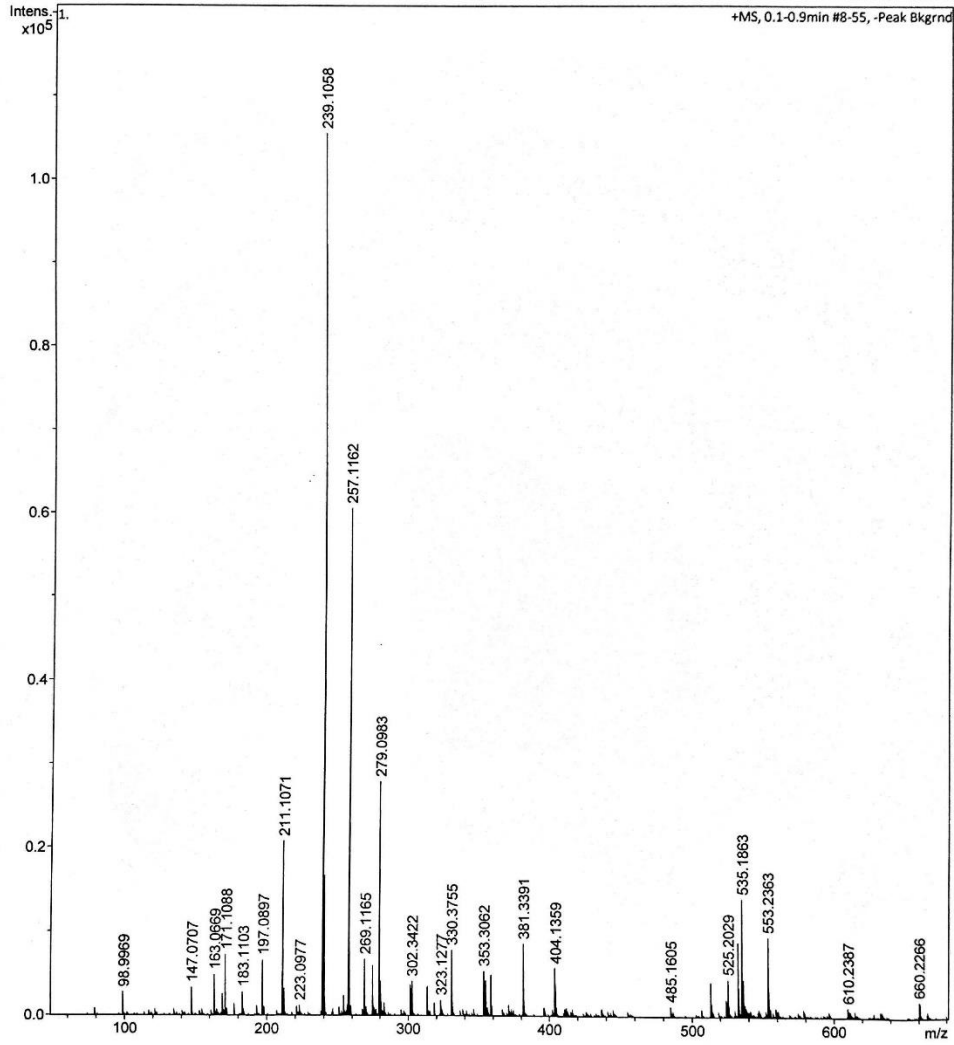

MS (ESI) spectrum of compound **LH-14**

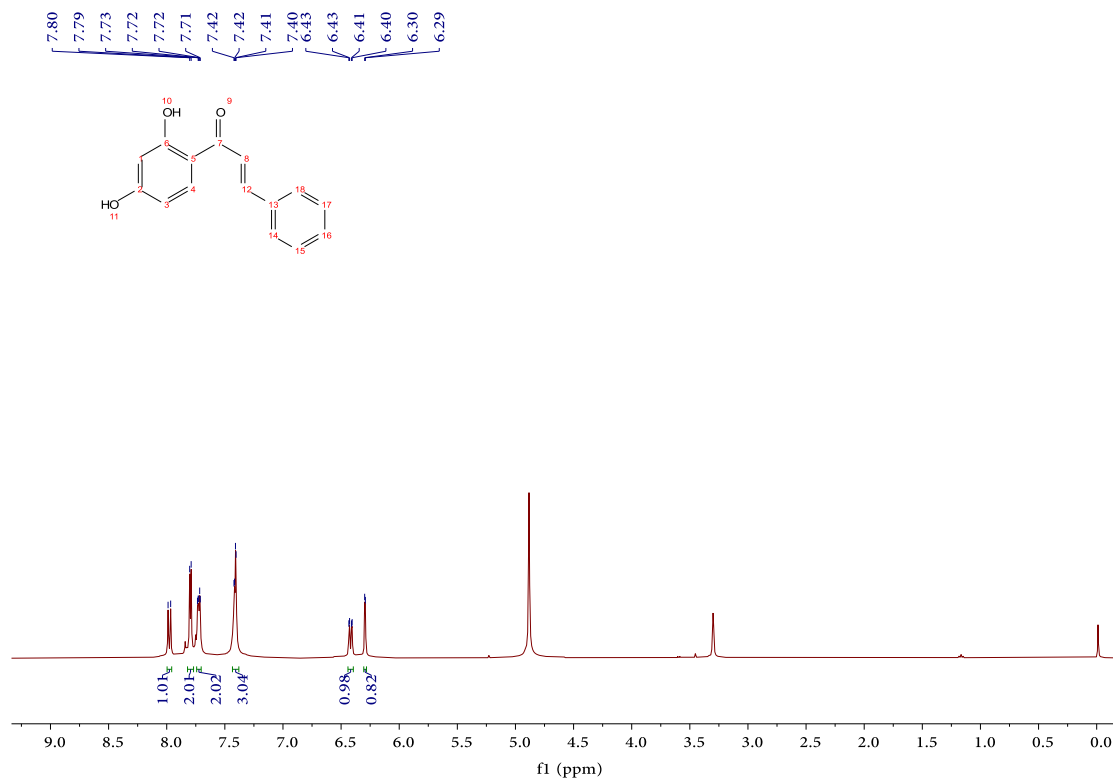

**<sup>1</sup>H NMR spectrum of compound LH-15**

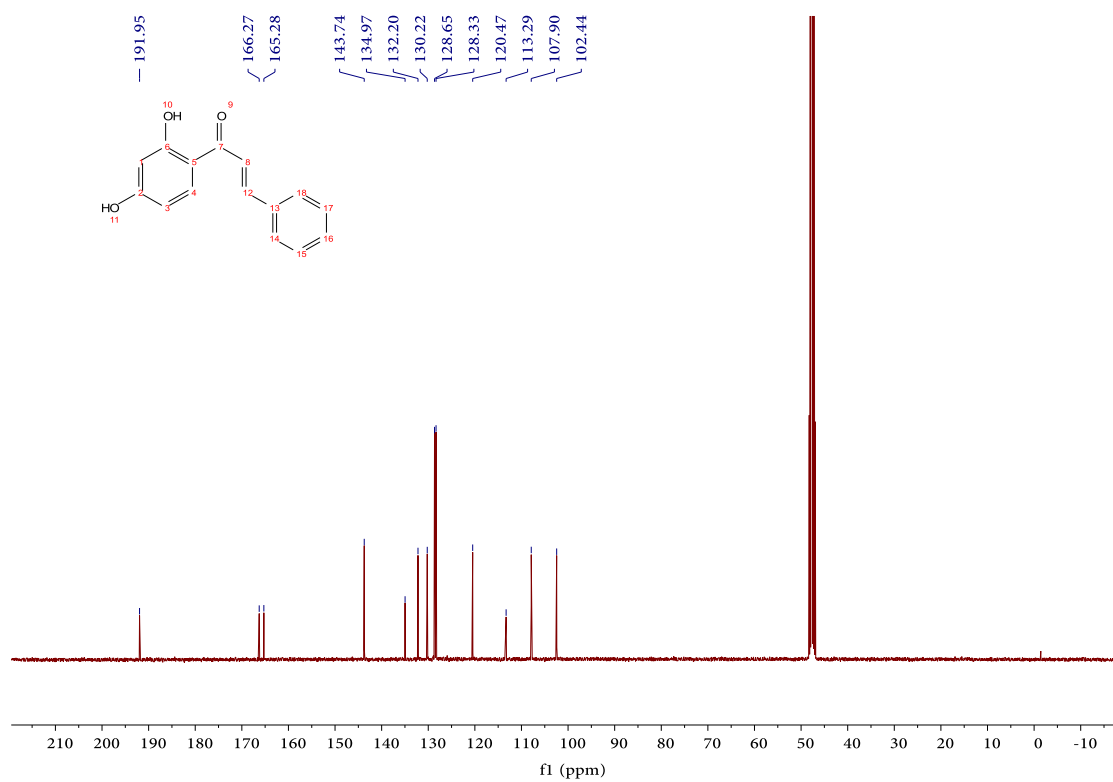

**<sup>13</sup>C NMR spectrum of compound LH-15**

## Generic Display Report

### Analysis Info

Analysis Name D:\Data\yang\new\LIHU200921\_1\_40\_01\_33891.d  
Method NEG\_100-1200\_For LC.m  
Sample Name LIHU200921\_1  
Comment

Acquisition Date 9/21/2020 1:51:18 PM

Operator LZU  
Instrument micrOTOF

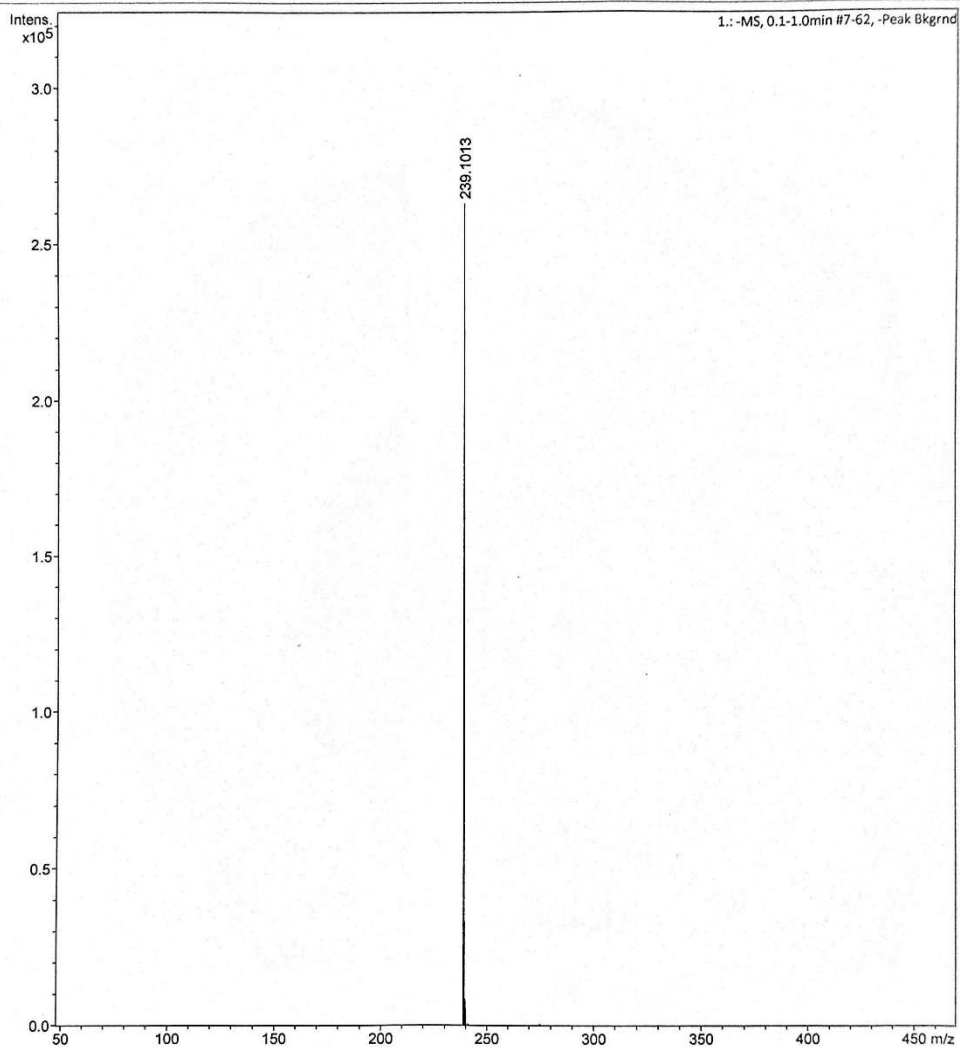

MS (ESI) spectrum of compound **LH-15**

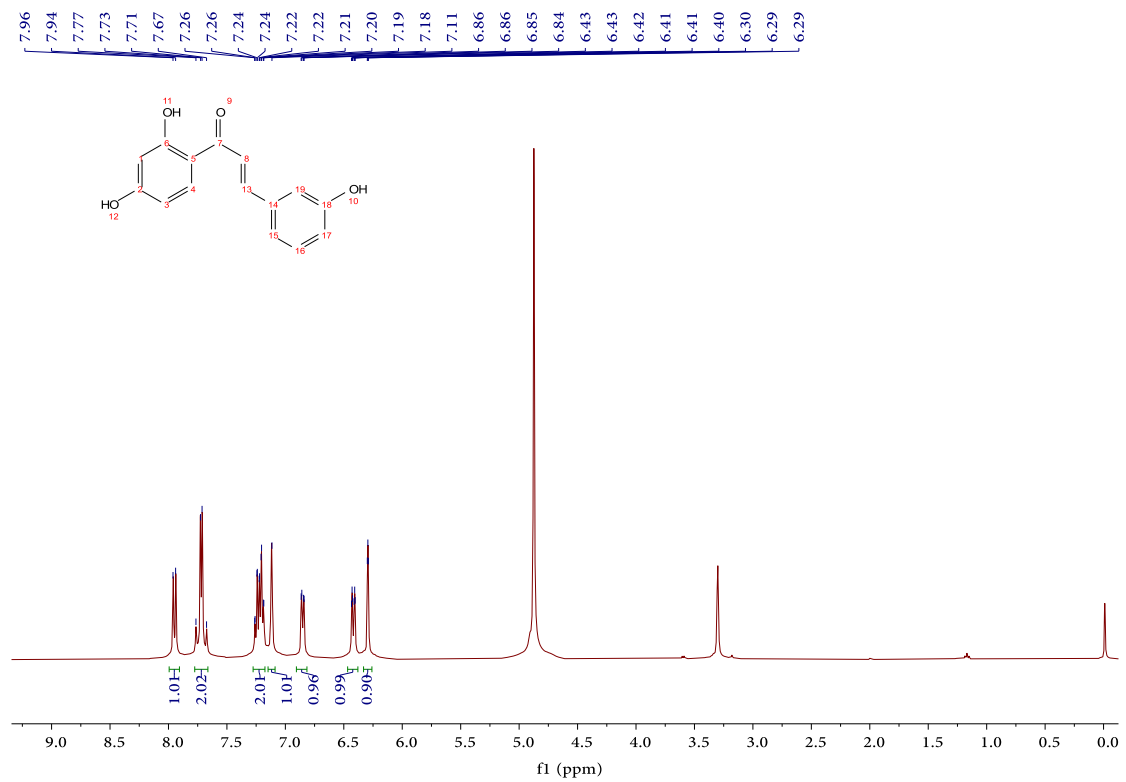

<sup>1</sup>H NMR spectrum of compound LH-16

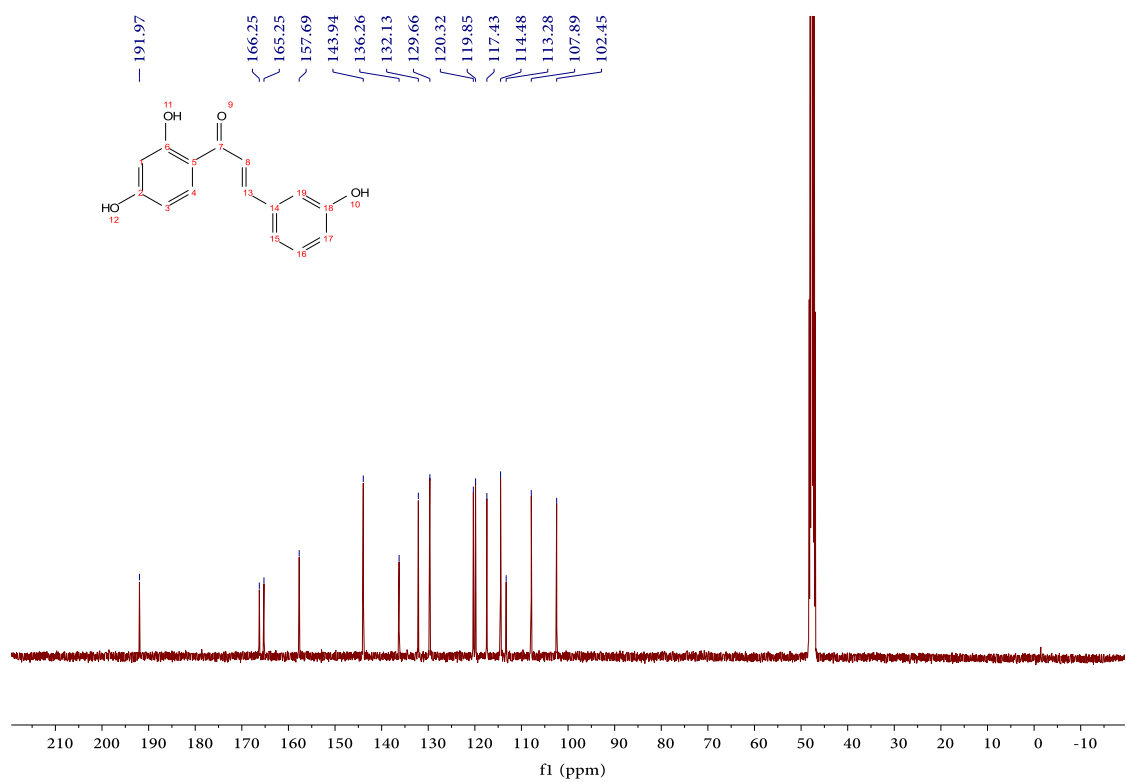

<sup>13</sup>C NMR spectrum of compound LH-16



## Generic Display Report

### Analysis Info

Analysis Name D:\Data\yang\new\LIHU201231\_7\_13\_01\_36597.d  
Method POS\_100-1200\_For LC.m  
Sample Name LIHU201231\_7  
Comment

Acquisition Date 12/31/2020 12:47:33 PM

Operator LZU  
Instrument micrOTOF

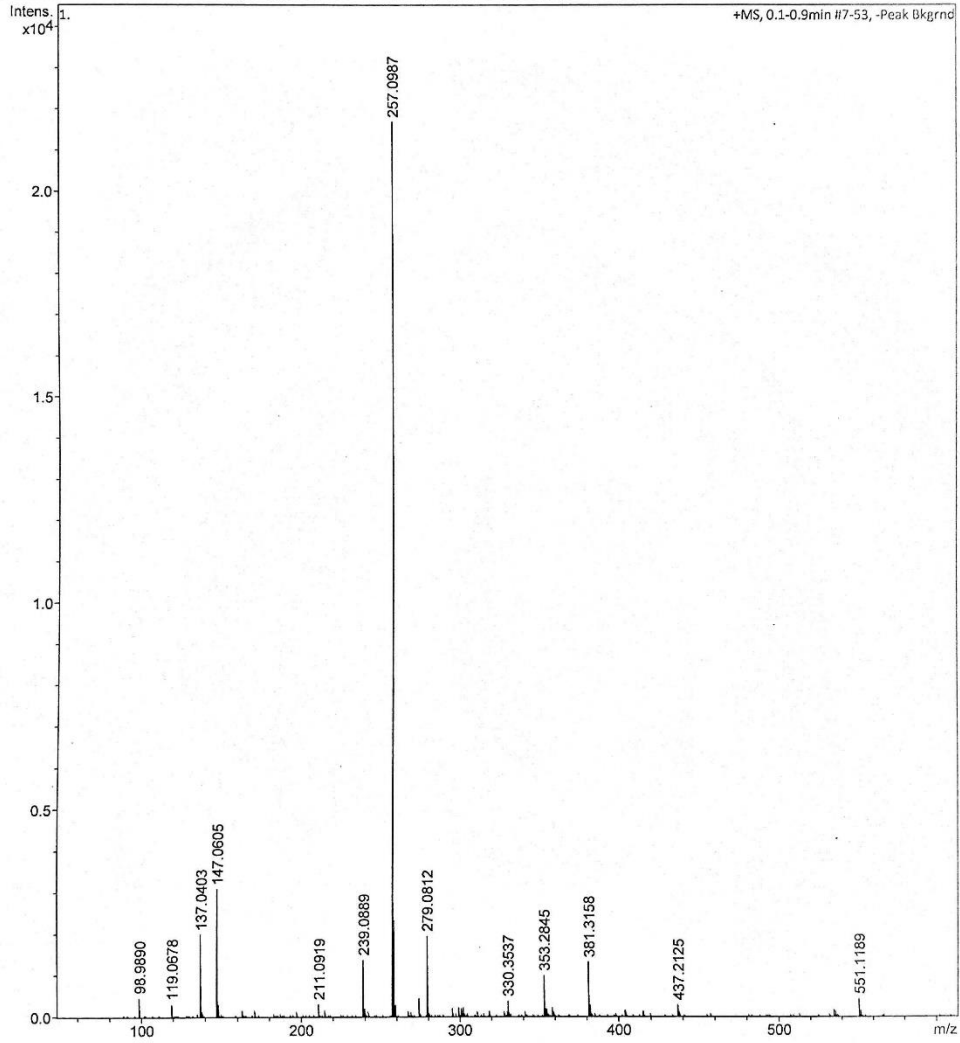

MS (ESI) spectrum of compound **LH-16**

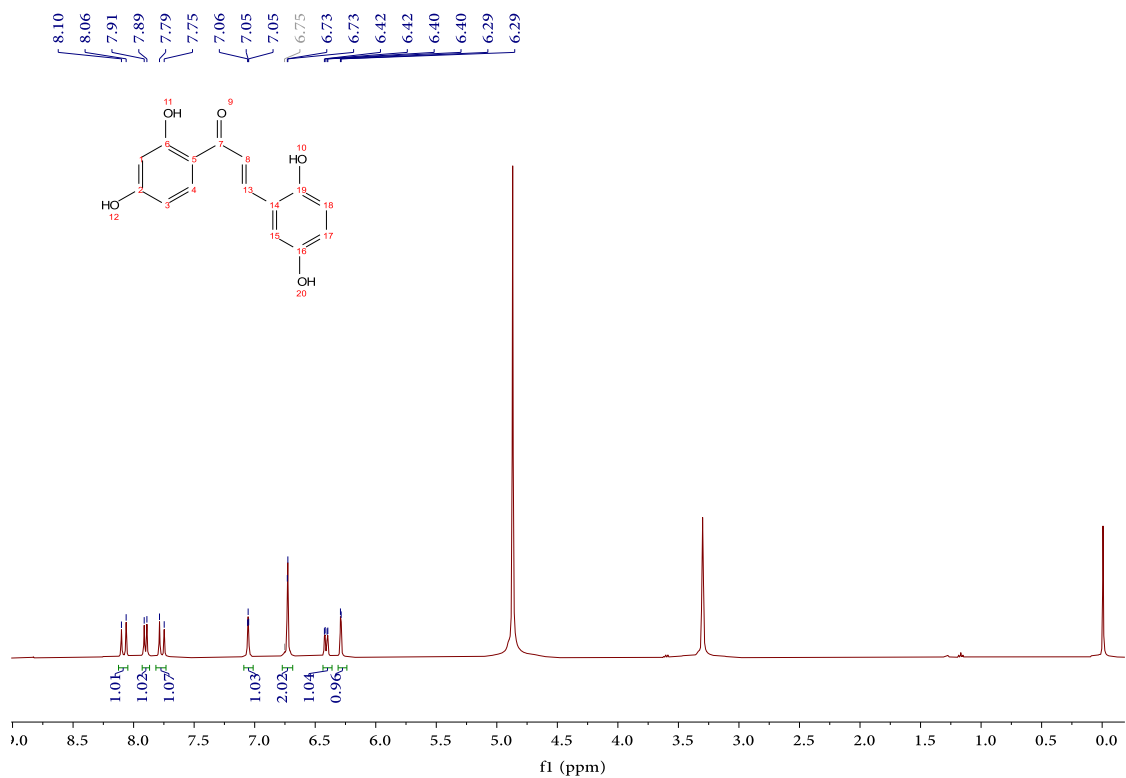

<sup>1</sup>H NMR spectrum of compound LH-17

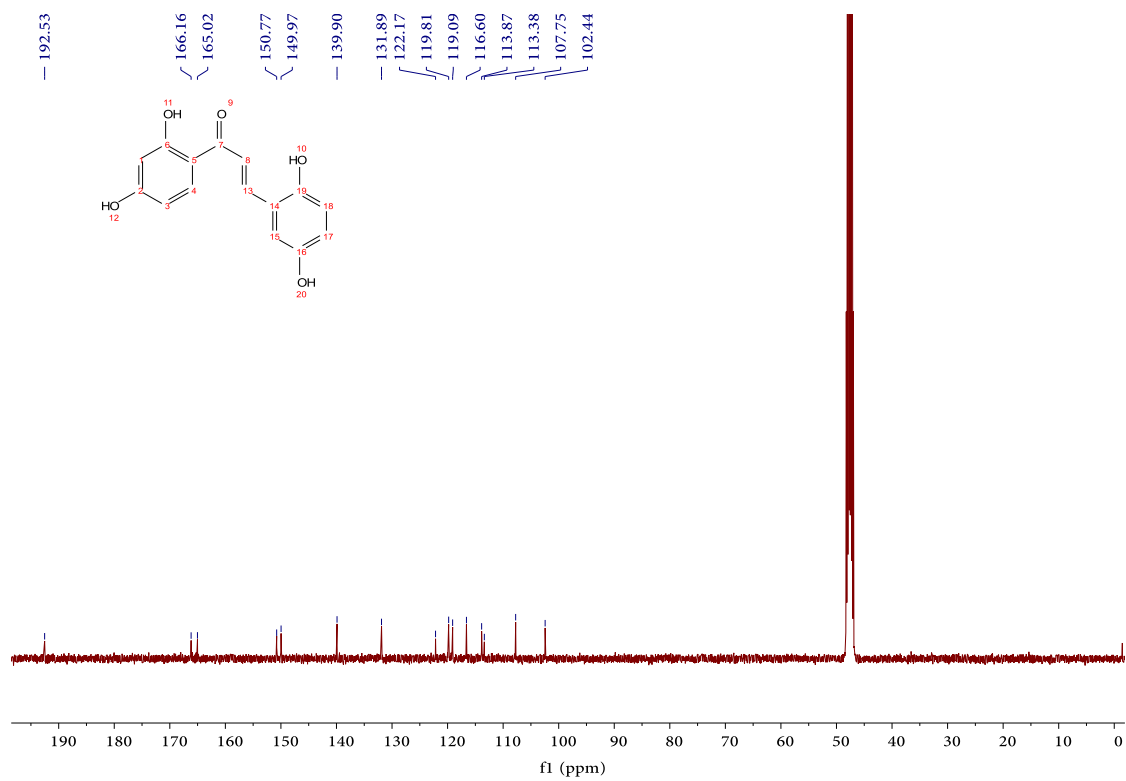

<sup>13</sup>C NMR spectrum of compound LH-17

## Generic Display Report

### Analysis Info

Analysis Name D:\Data\yangy\new\LIHU200907\_2\_22\_01\_33445.d  
Method NEG\_100-1200\_For LC.m  
Sample Name LIHU200907\_2  
Comment

Acquisition Date 9/7/2020 4:04:45 PM

Operator LZU  
Instrument micrOTOF

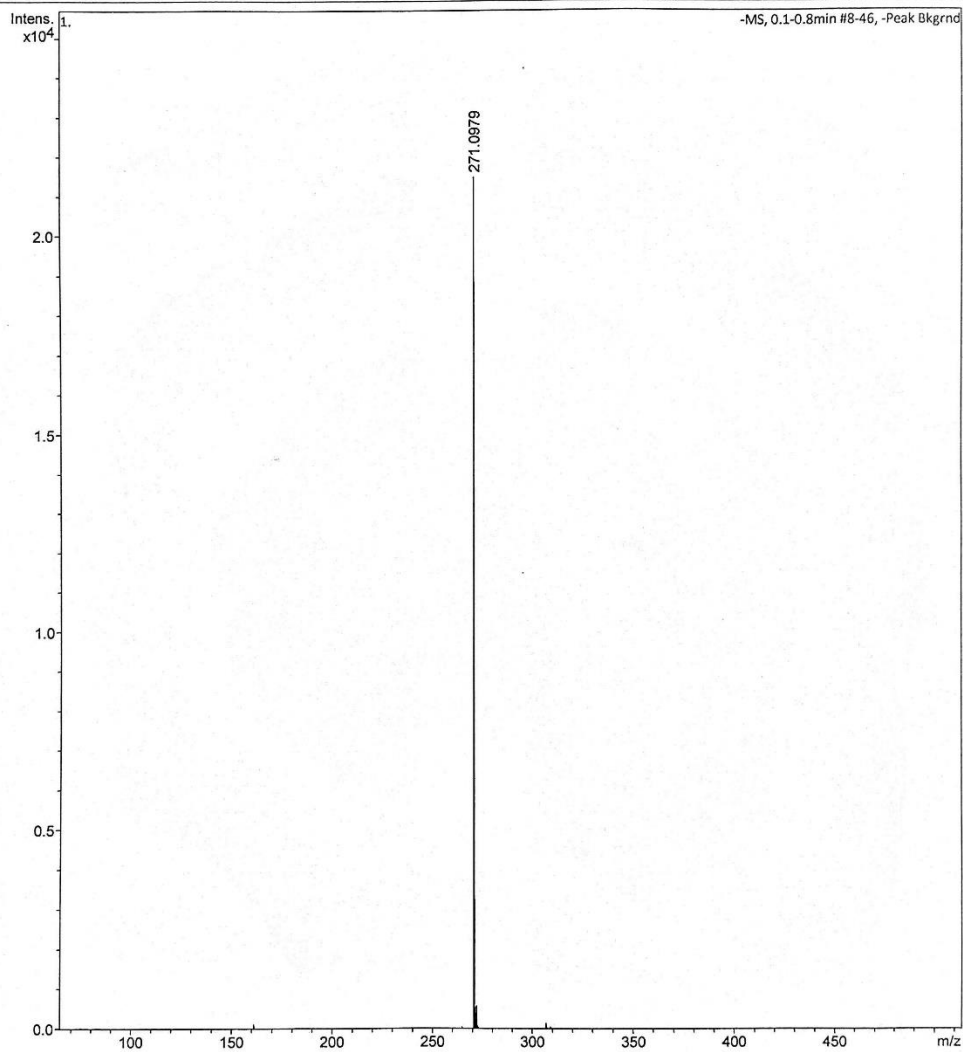

MS (ESI) spectrum of compound **LH-17**

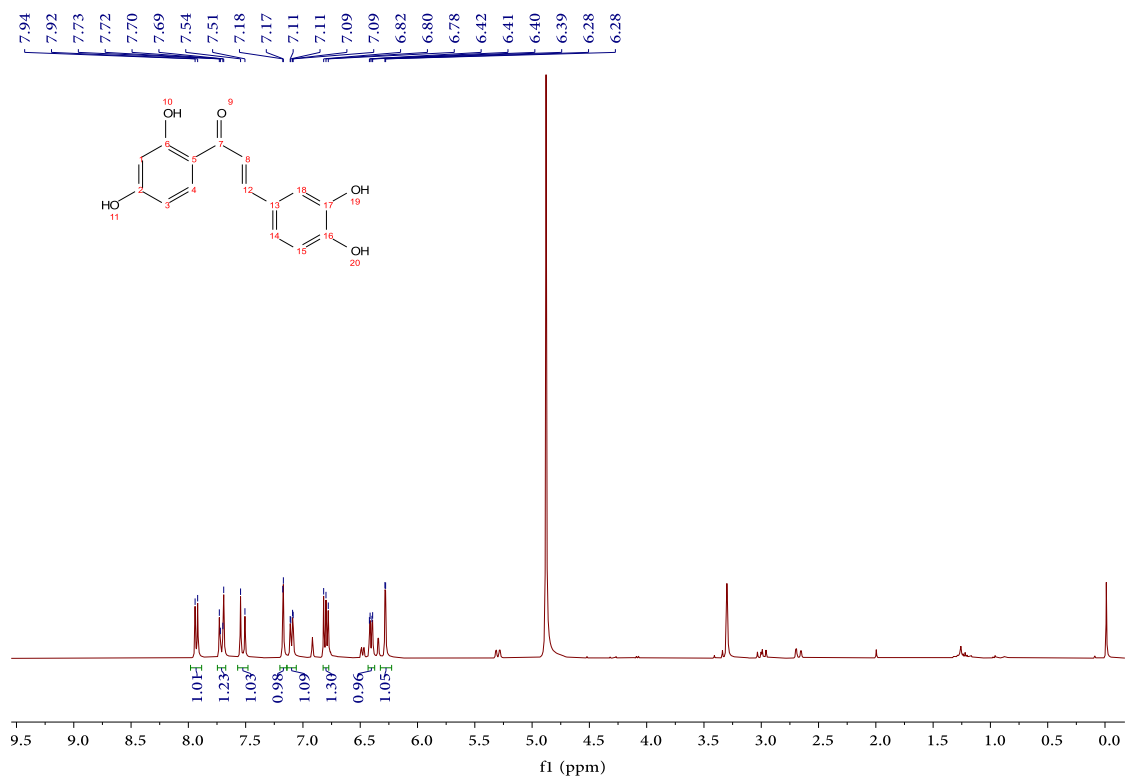

$^1\text{H NMR}$  spectrum of compound LH-18

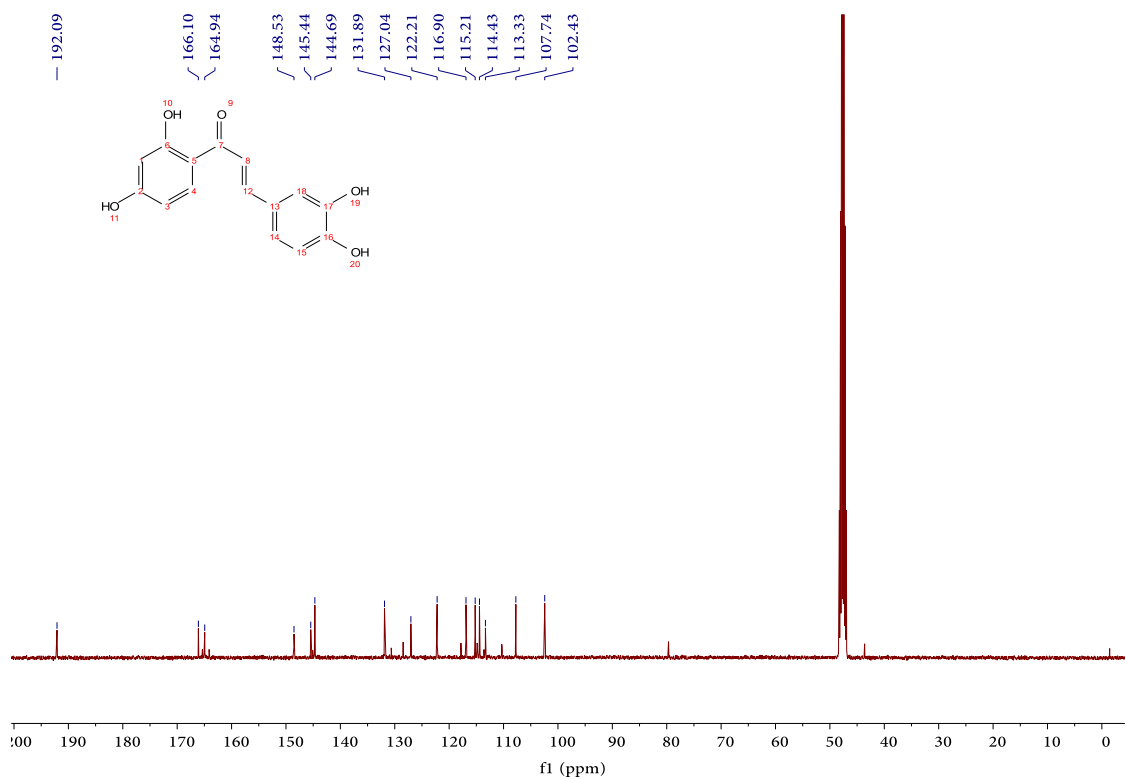

$^{13}\text{C NMR}$  spectrum of compound LH-18

# Generic Display Report

## Analysis Info

Analysis Name D:\Data\yangy\new\LIHU200831\_21\_01\_33223.d  
Method POS\_100-1200\_For LC.m  
Sample Name LIHU200831  
Comment

Acquisition Date 8/31/2020 1:08:04 PM

Operator LZU  
Instrument micrOTOF

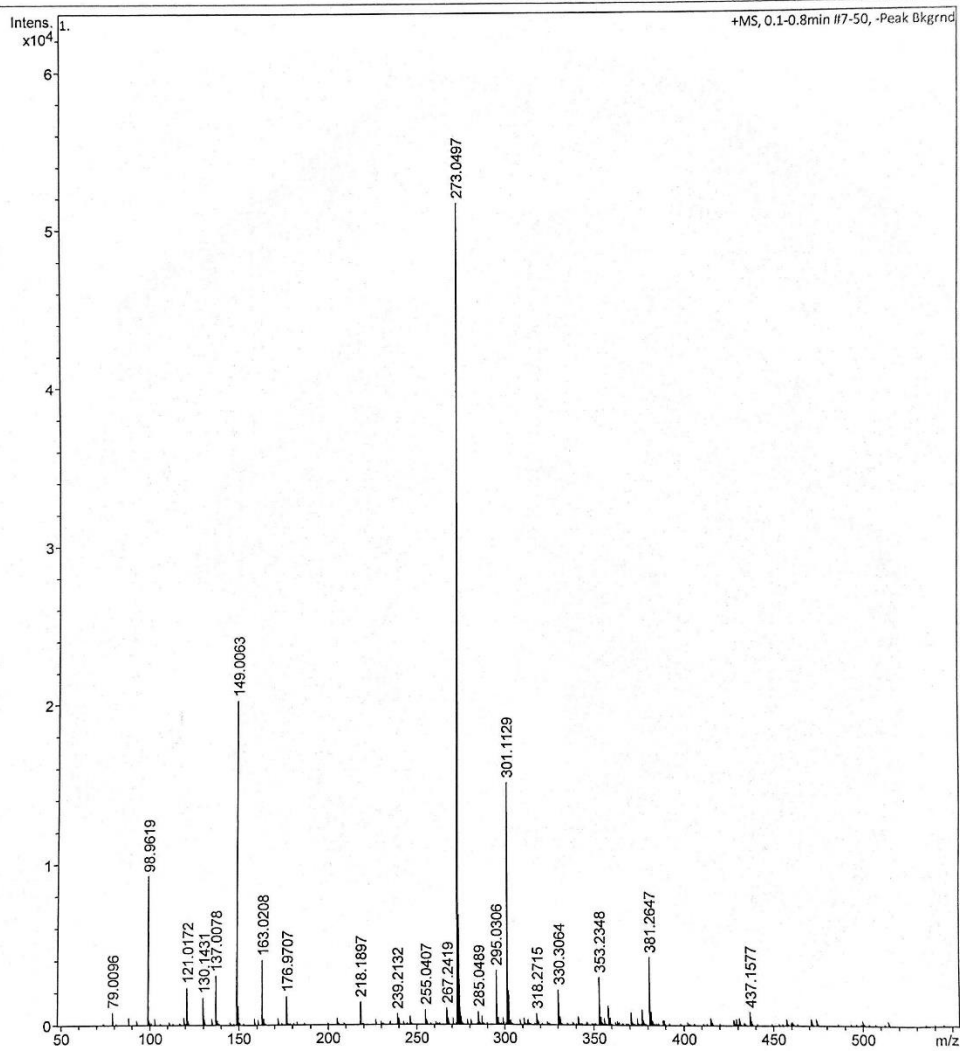

MS (ESI) spectrum of compound **LH-18**

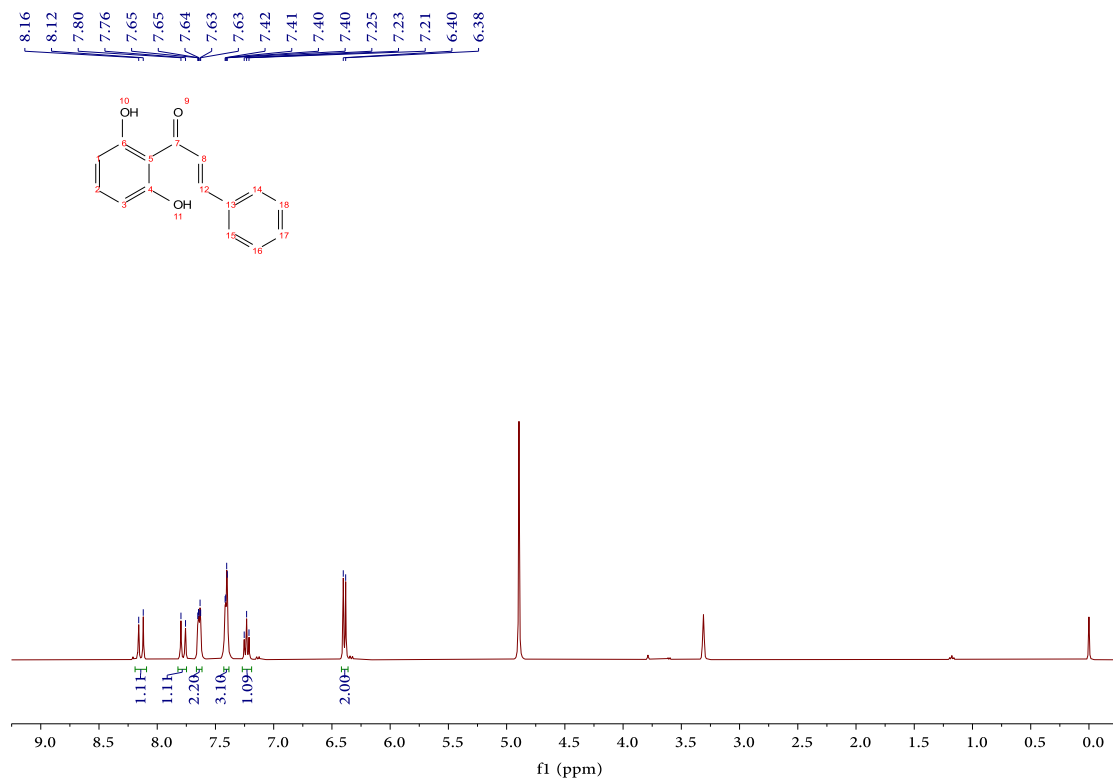

<sup>1</sup>H NMR spectrum of compound LH-19

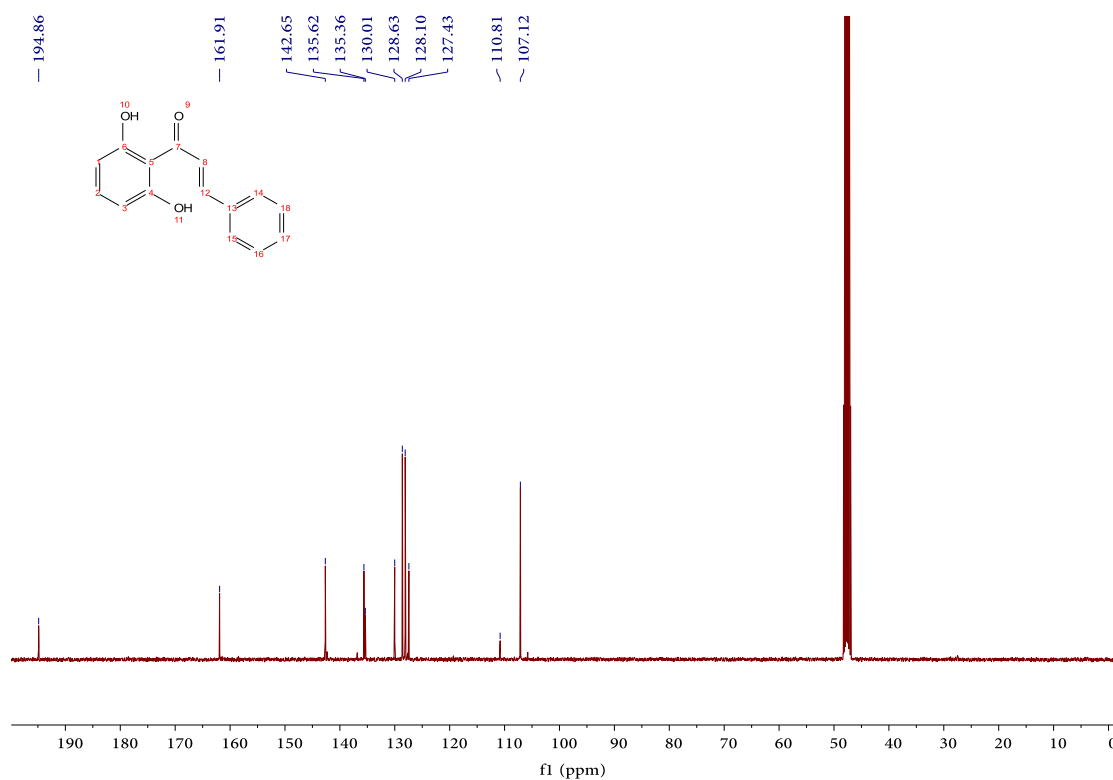

<sup>13</sup>C NMR spectrum of compound LH-19

## Generic Display Report

|               |                                              |                      |          |
|---------------|----------------------------------------------|----------------------|----------|
| Analysis Info | Acquisition Date                             | 9/14/2020 2:04:59 PM |          |
| Analysis Name | D:\Data\yangy\new\LIHU200914_1_34_01_33679.d | Operator             | LZU      |
| Method        | NEG_100-1200_For LC.m                        | Instrument           | micrOTOF |
| Sample Name   | LIHU200914_1                                 |                      |          |
| Comment       |                                              |                      |          |

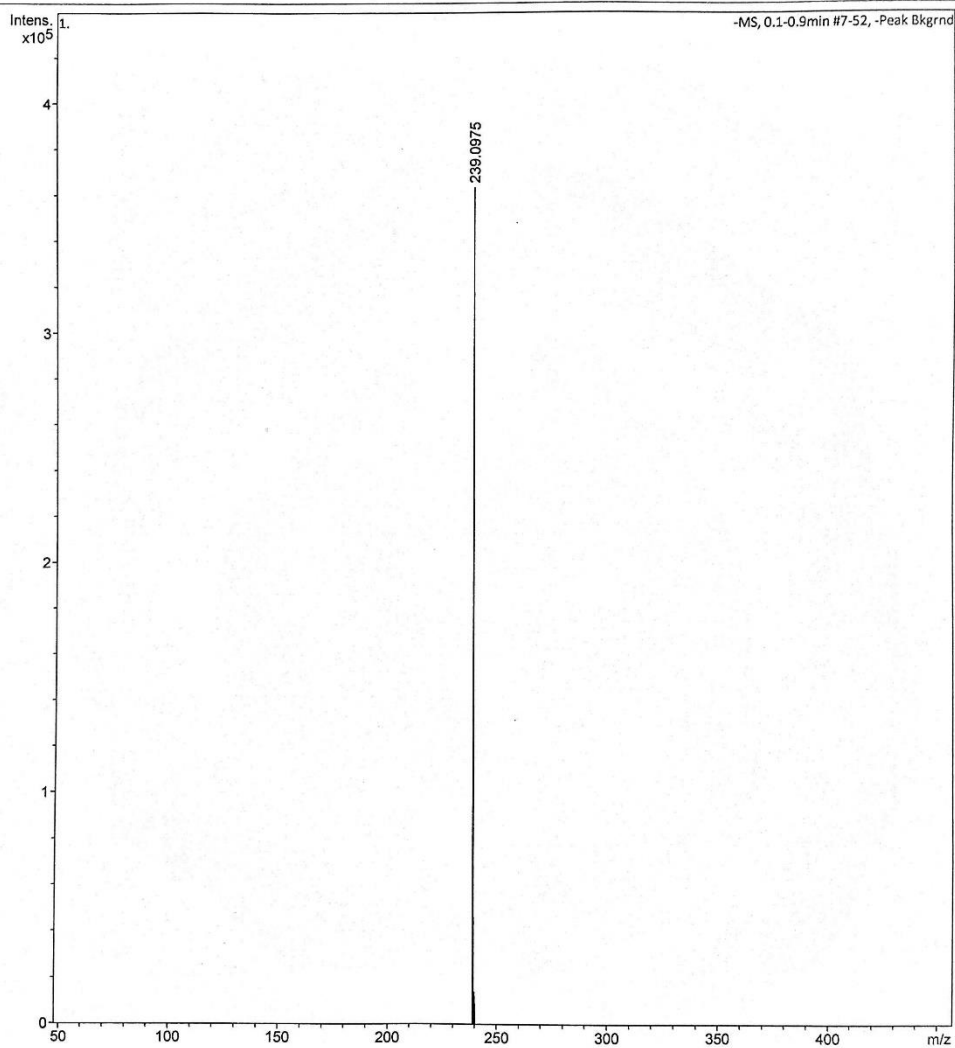

MS (ESI) spectrum of compound **LH-19**

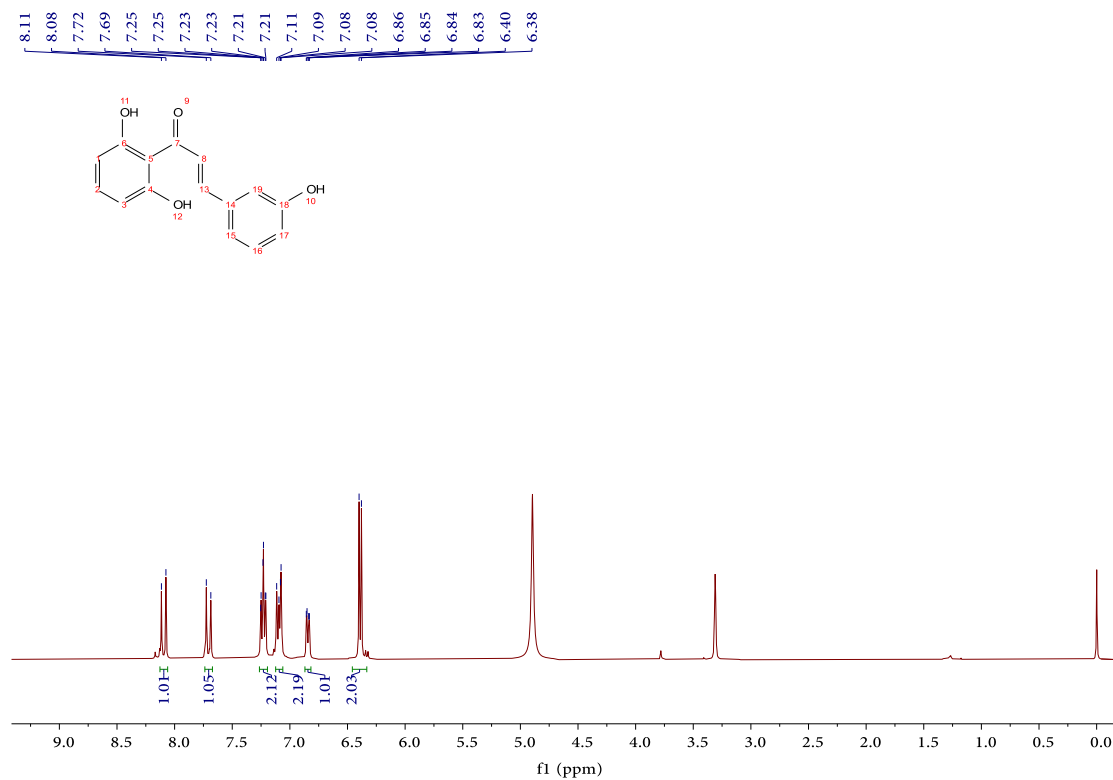

$^1\text{H NMR}$  spectrum of compound LH-20

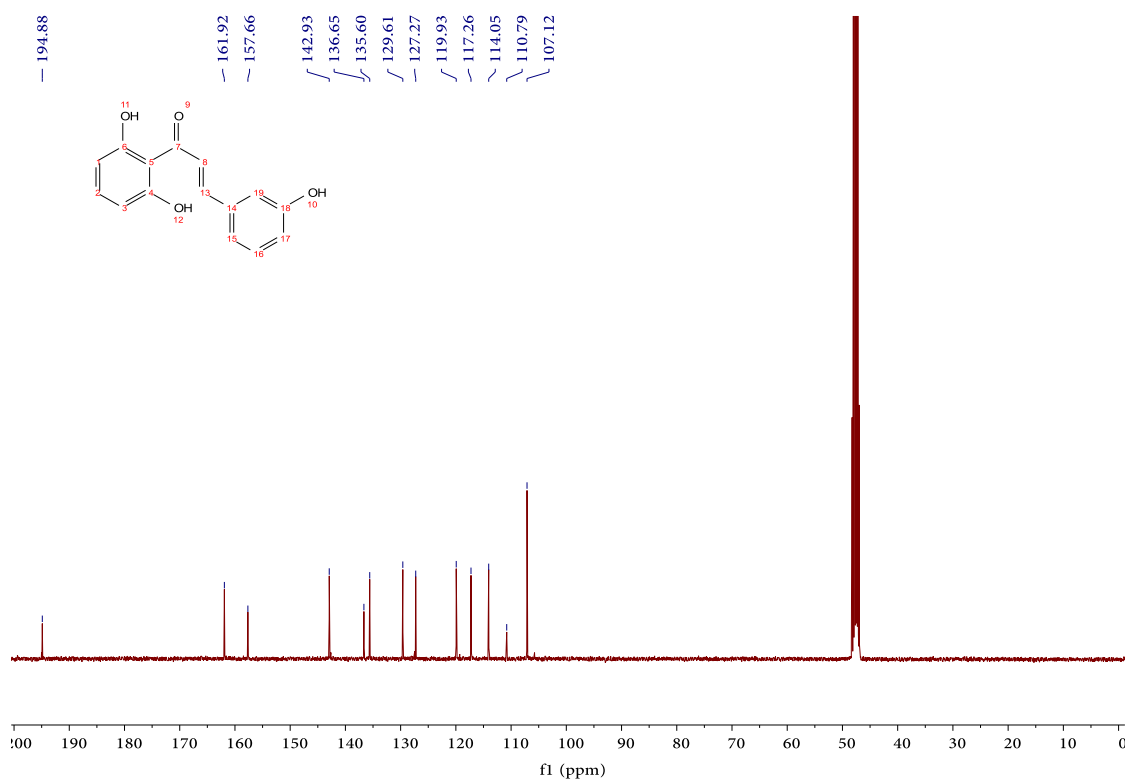

$^{13}\text{C NMR}$  spectrum of compound LH-20



## Generic Display Report

### Analysis Info

Analysis Name D:\Datayangynew\LIHU201231\_8\_14\_01\_36598.d  
Method POS\_100-1200\_For LC.m  
Sample Name LIHU201231\_8  
Comment

Acquisition Date 12/31/2020 12:50:38 PM

Operator LZU  
Instrument micrOTOF

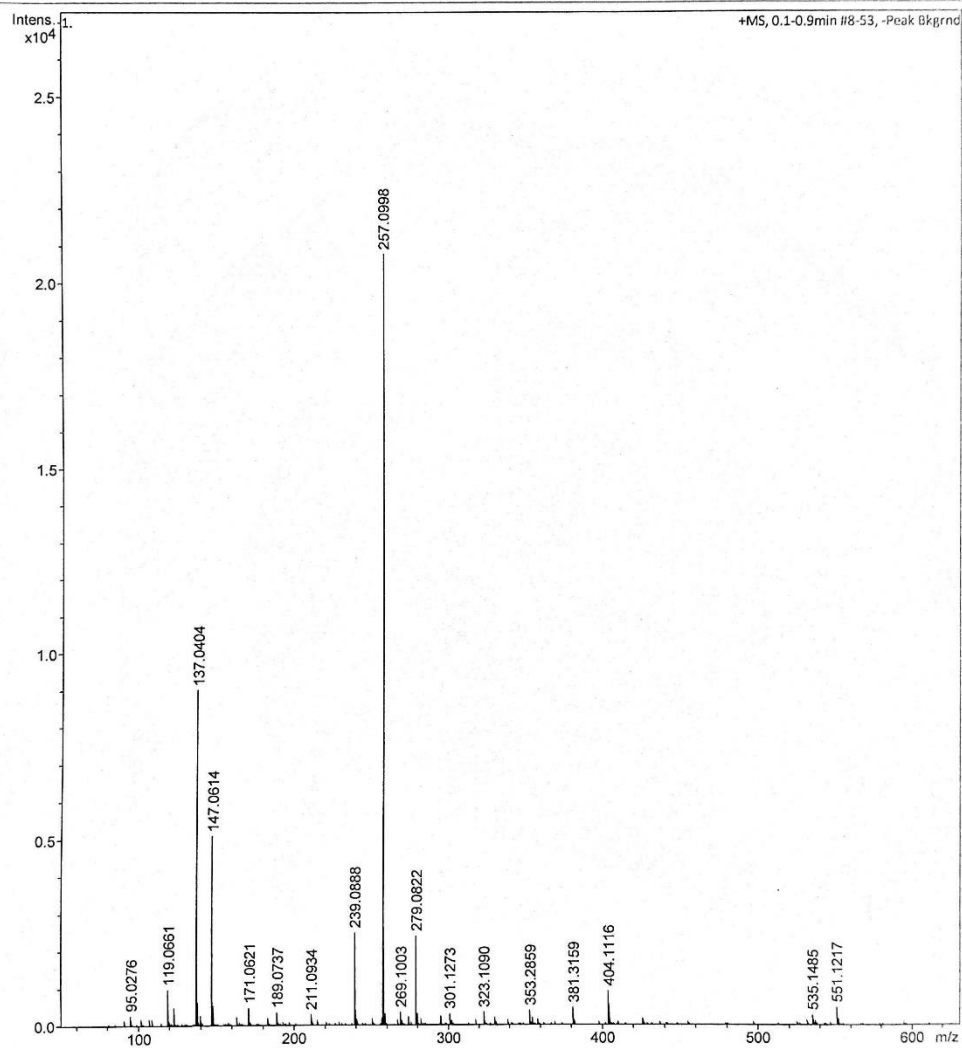

MS (ESI) spectrum of compound **LH-20**

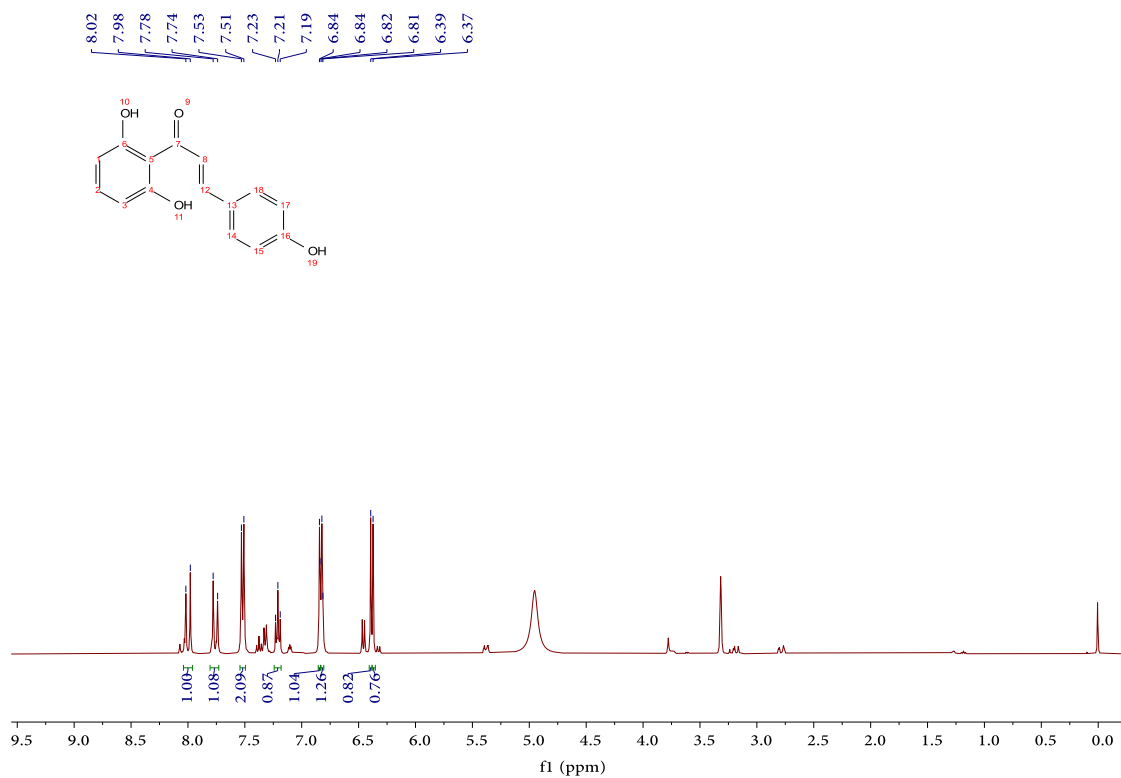

$^1\text{H NMR}$  spectrum of compound LH-21

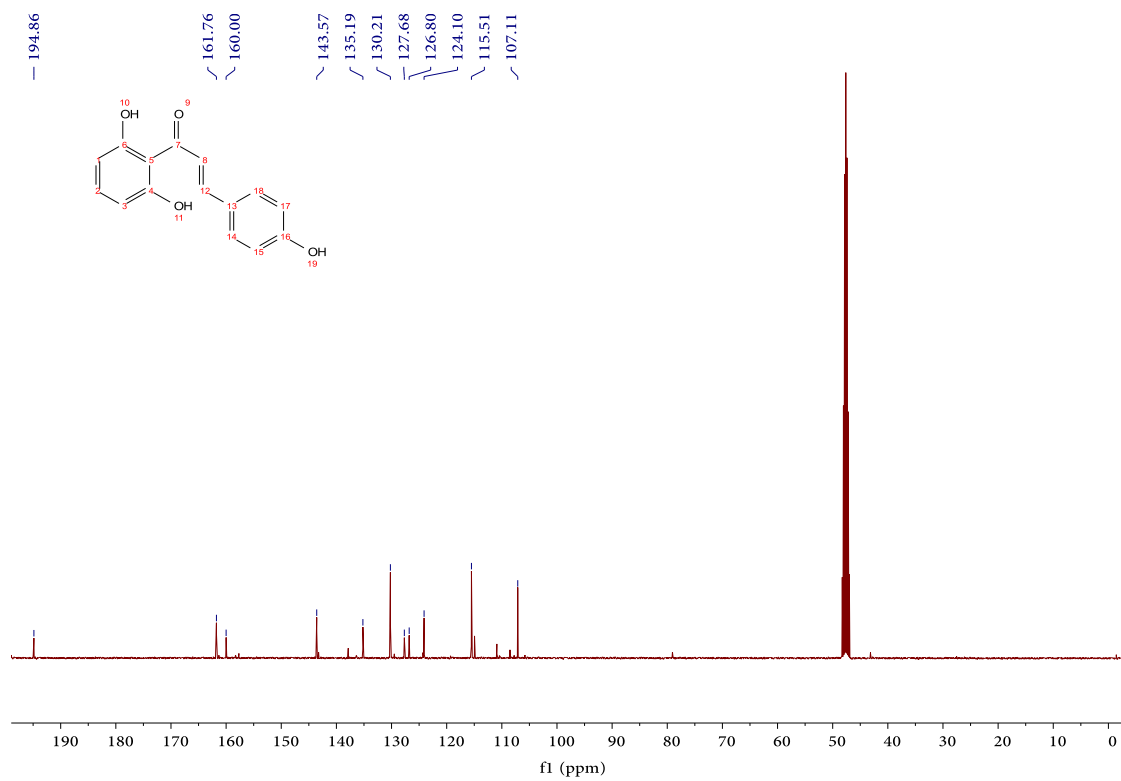

$^{13}\text{C NMR}$  spectrum of compound LH-21

## Generic Display Report

### Analysis Info

Analysis Name D:\Data\yangy\new\LIHU210112\_15\_24\_01\_36832.d  
Method POS\_100-1200\_For LC.m  
Sample Name LIHU210112\_15  
Comment

Acquisition Date 1/12/2021 1:11:03 PM

Operator LZU  
Instrument micrOTOF

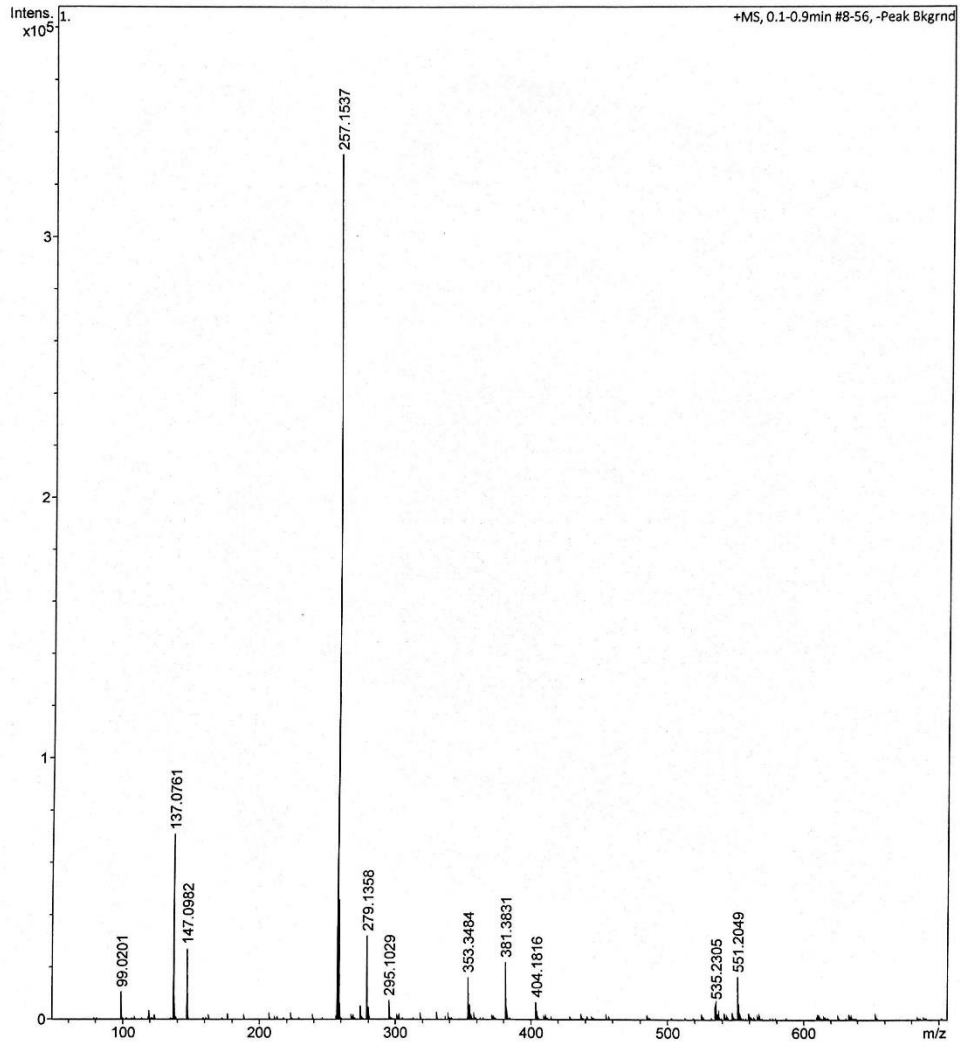

MS (ESI) spectrum of compound **LH-21**

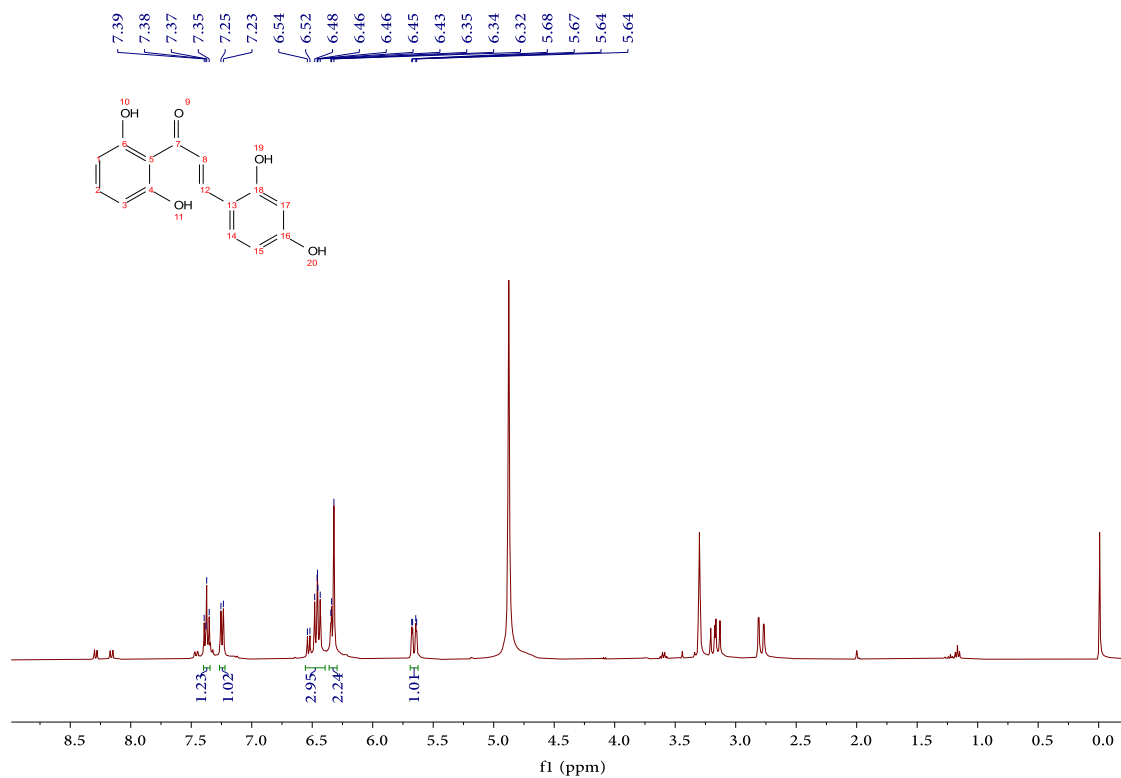

<sup>1</sup>H NMR spectrum of compound LH-22

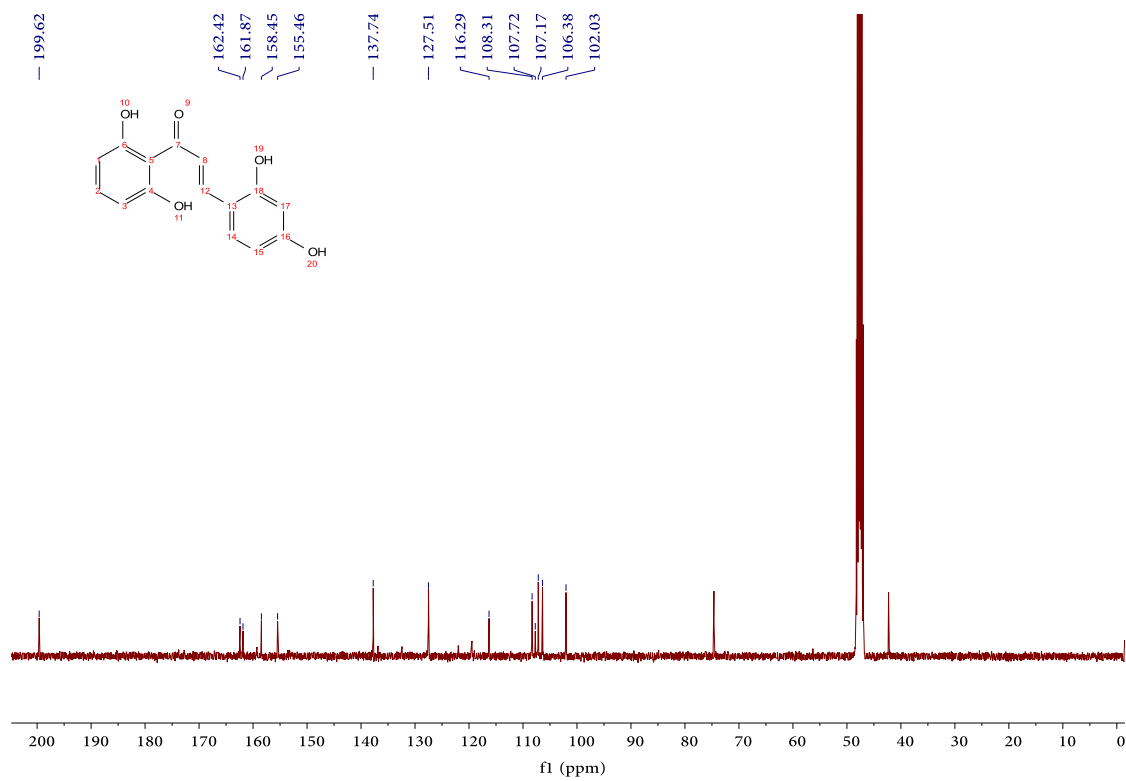

<sup>13</sup>C NMR spectrum of compound LH-22

## Generic Display Report

### Analysis Info

Analysis Name D:\Data\yangy\new\LIHU200907\_4\_24\_01\_33447.d  
Method NEG\_100-1200\_For LC.m  
Sample Name LIHU200907\_4  
Comment

Acquisition Date 9/7/2020 4:10:55 PM

Operator LZU  
Instrument micrOTOF

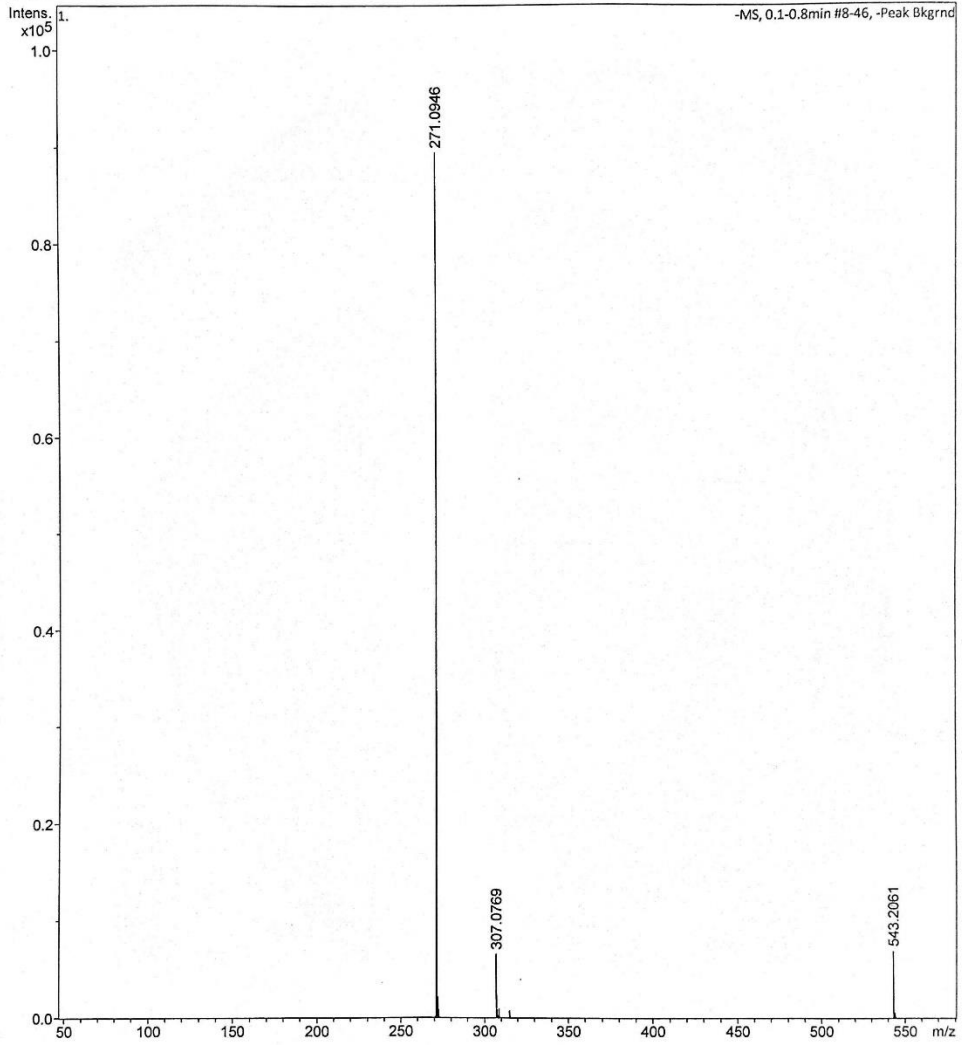

MS (ESI) spectrum of compound **LH-22**

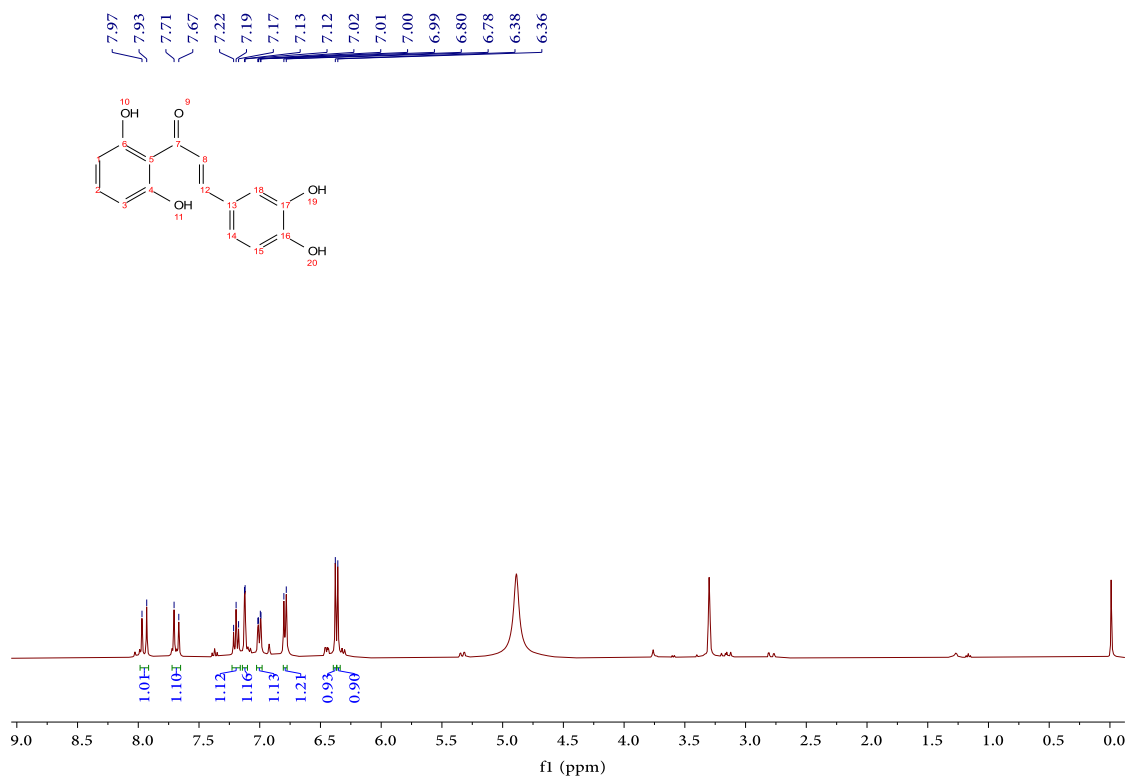

$^1\text{H}$  NMR spectrum of compound LH-23

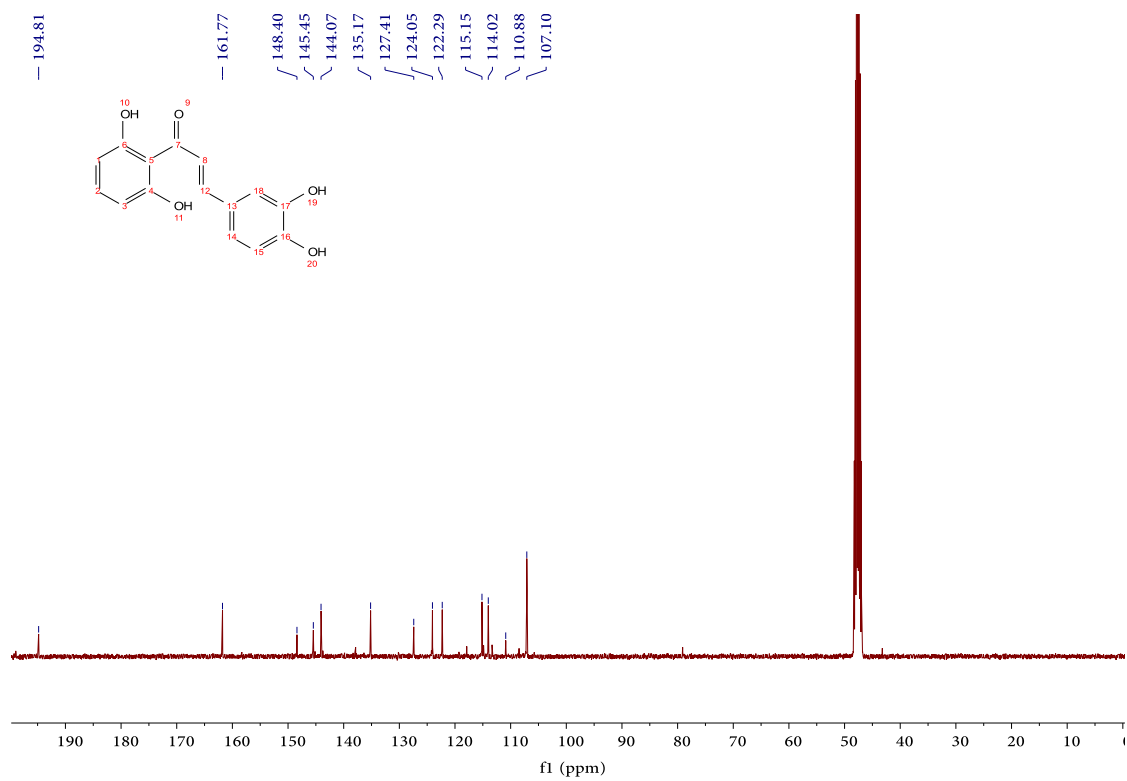

$^{13}\text{C}$  NMR spectrum of compound LH-23

## Generic Display Report

### Analysis Info

Analysis Name D:\Data\yangy\new\LIHU200915\_1\_40\_01\_33724.d  
Method NEG\_100-1200\_For LC.m  
Sample Name LIHU200915\_1  
Comment

Acquisition Date 9/15/2020 2:04:34 PM

Operator LZU  
Instrument micrOTOF

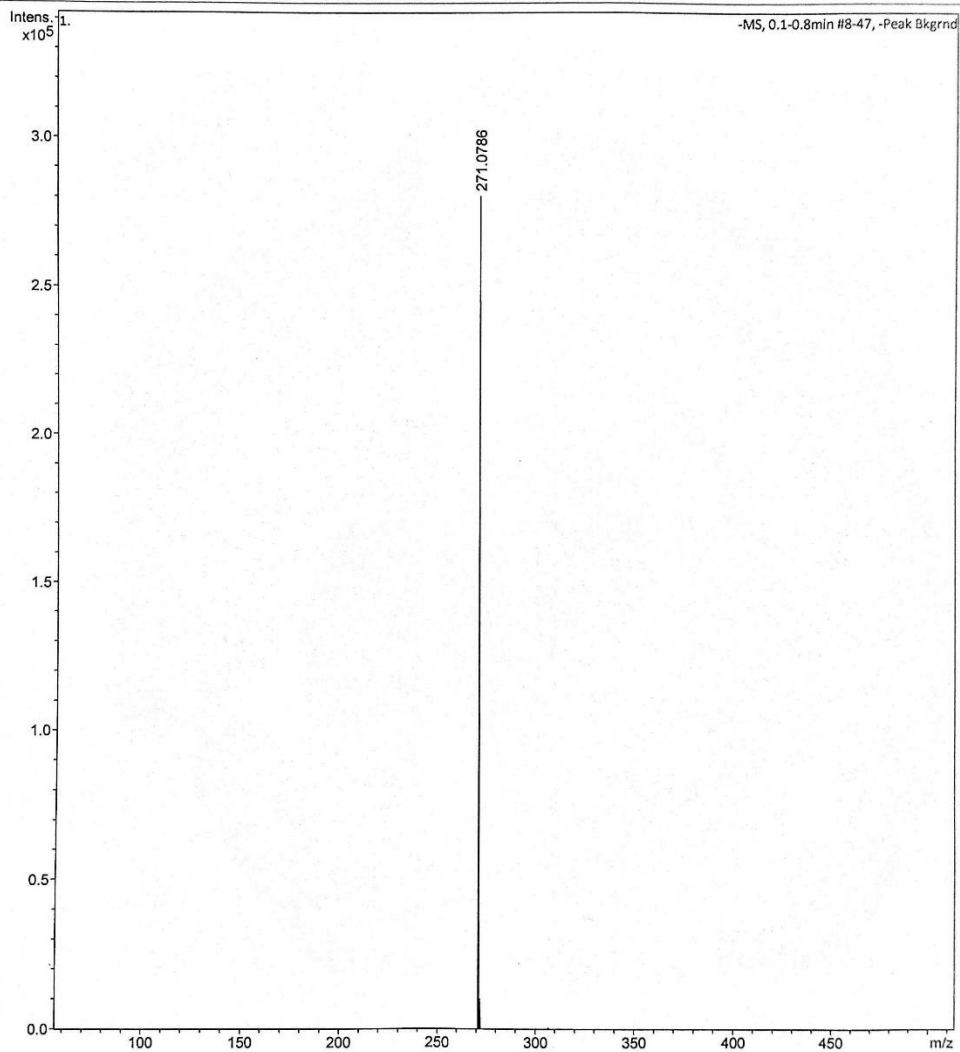

MS (ESI) spectrum of compound **LH-23**

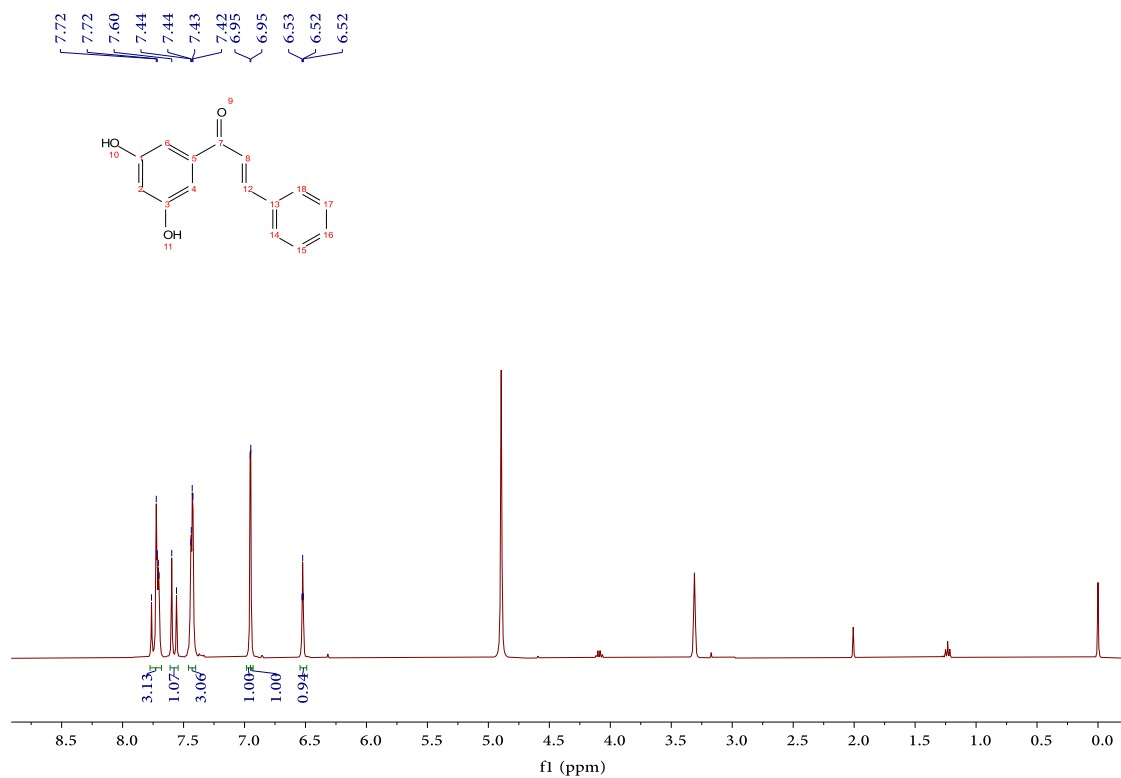

**<sup>1</sup>H NMR spectrum of compound LH-24**

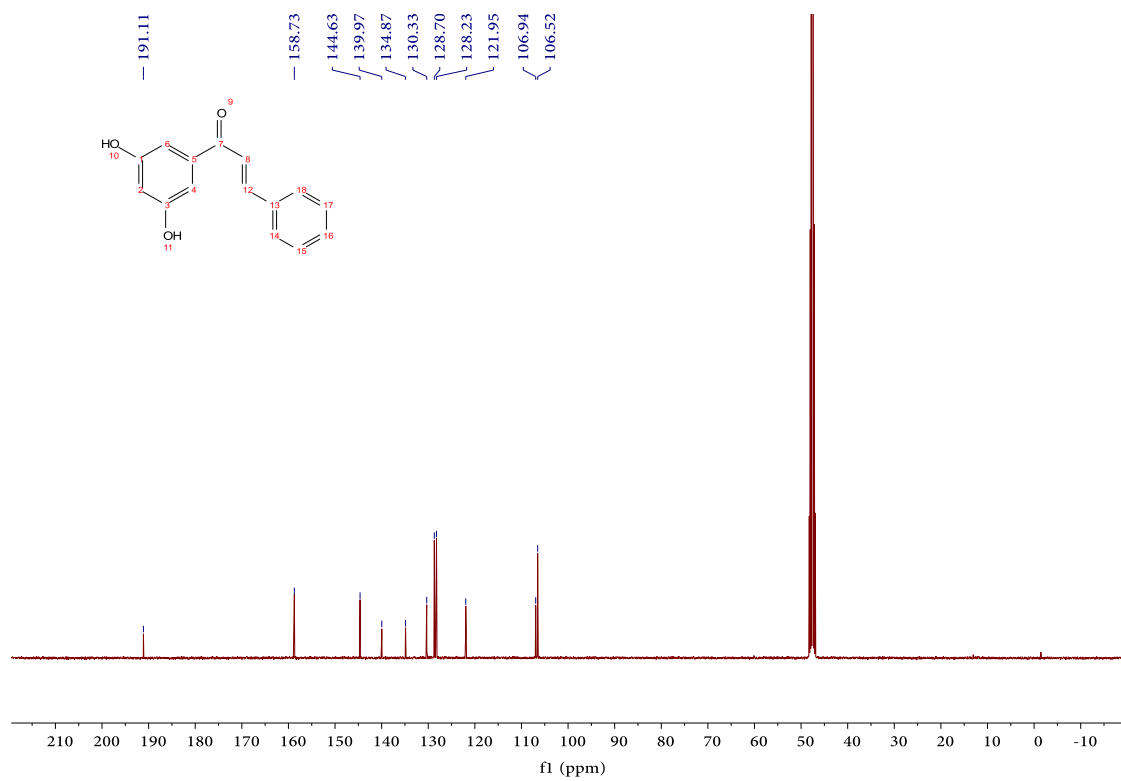

**<sup>13</sup>C NMR spectrum of compound LH-24**



# Generic Display Report

## Analysis Info

Analysis Name D:\Data\yangy\new\LIHU210112\_12\_21\_01\_36829.d  
Method POS\_100-1200\_For LC.m  
Sample Name LIHU210112\_12  
Comment

Acquisition Date 1/12/2021 1:01:52 PM  
Operator LZU  
Instrument microTOF

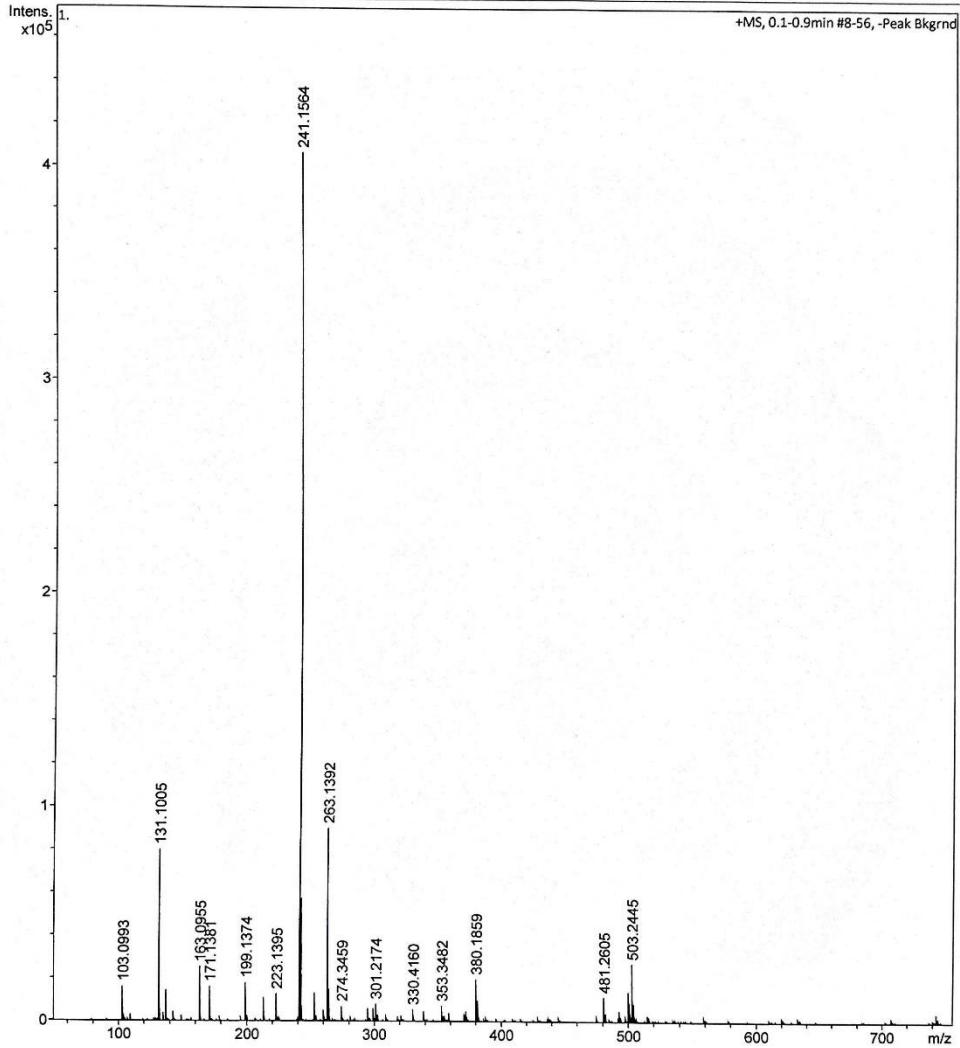

MS (ESI) spectrum of compound **LH-24**

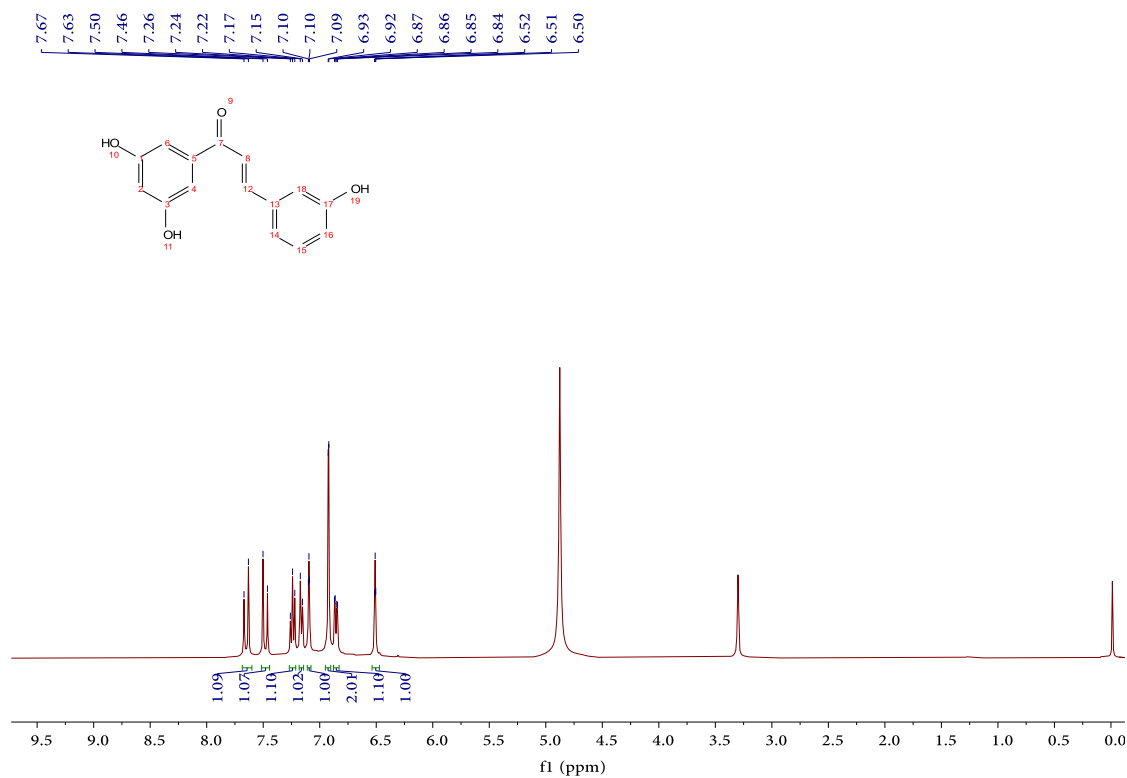

$^1\text{H NMR}$  spectrum of compound **LH-25**

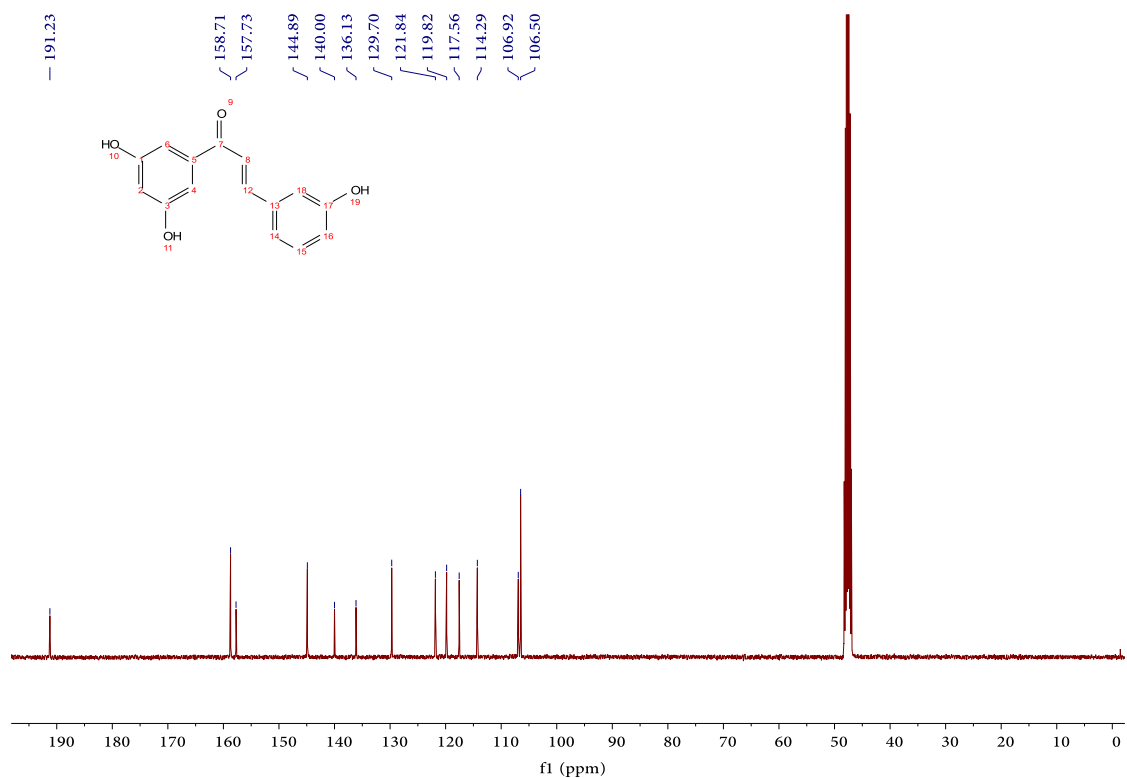

$^{13}\text{C NMR}$  spectrum of compound **LH-25**

## Generic Display Report

### Analysis Info

Analysis Name D:\Data\yangy\new\LIHU201231\_2\_8\_01\_36592.d  
Method POS\_100-1200\_For LC.m  
Sample Name LIHU201231\_2  
Comment

Acquisition Date 12/31/2020 12:32:08 PM

Operator LZU  
Instrument micrOTOF

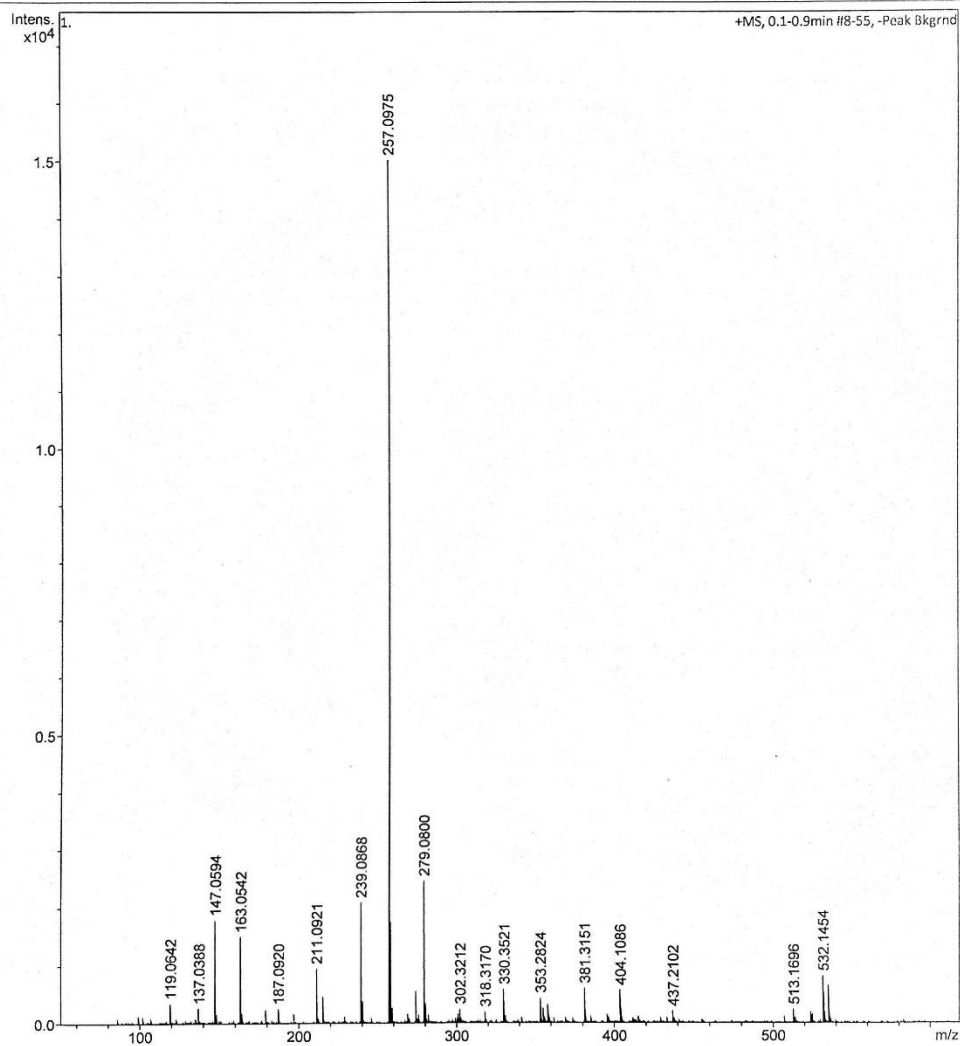

MS (ESI) spectrum of compound **LH-25**

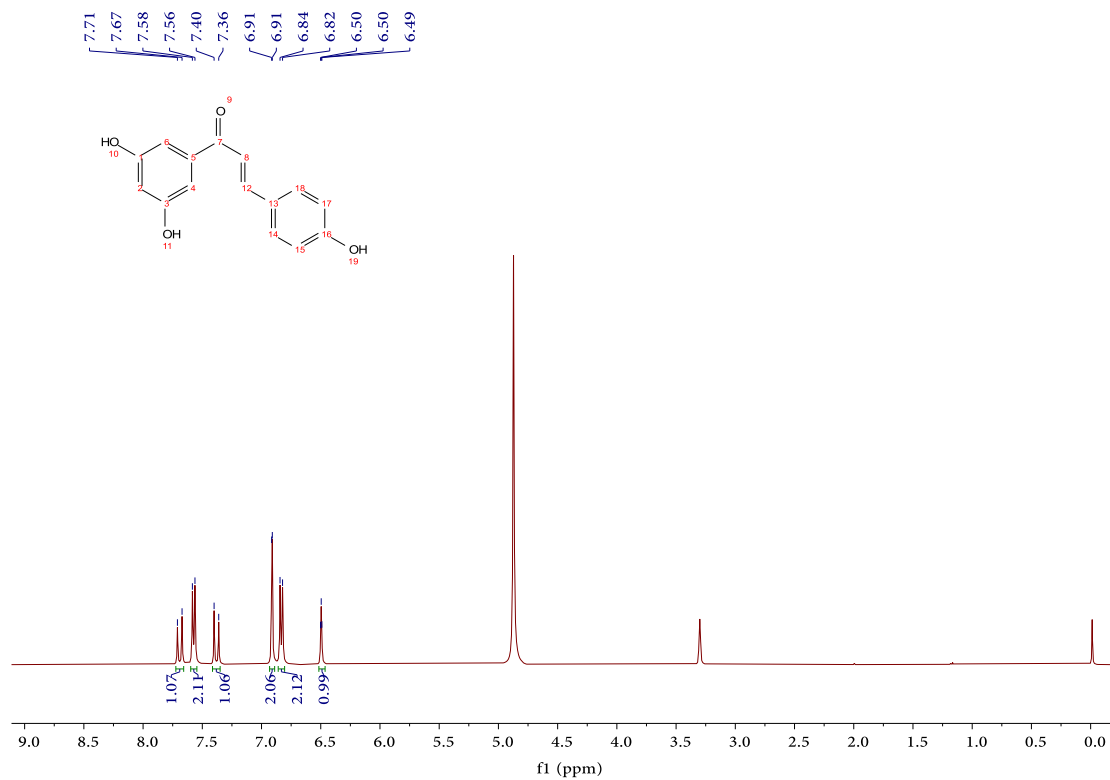

$^1\text{H}$  NMR spectrum of compound LH-26

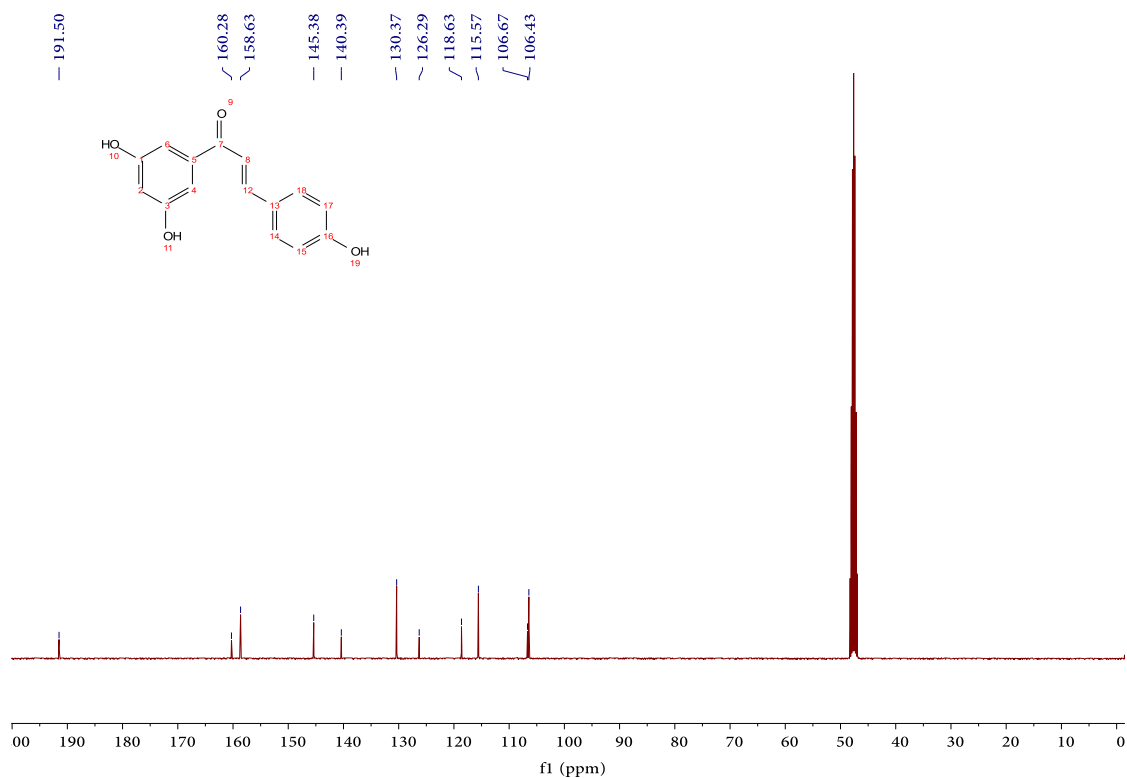

$^{13}\text{C}$  NMR spectrum of compound LH-26

## Generic Display Report

### Analysis Info

Analysis Name D:\Data\yangy\new\LIHU210112\_11\_20\_01\_36828.d  
Method POS\_100-1200\_For LC.m  
Sample Name LIHU210112\_11  
Comment

Acquisition Date 1/12/2021 12:58:47 PM

Operator LZU  
Instrument micrOTOF

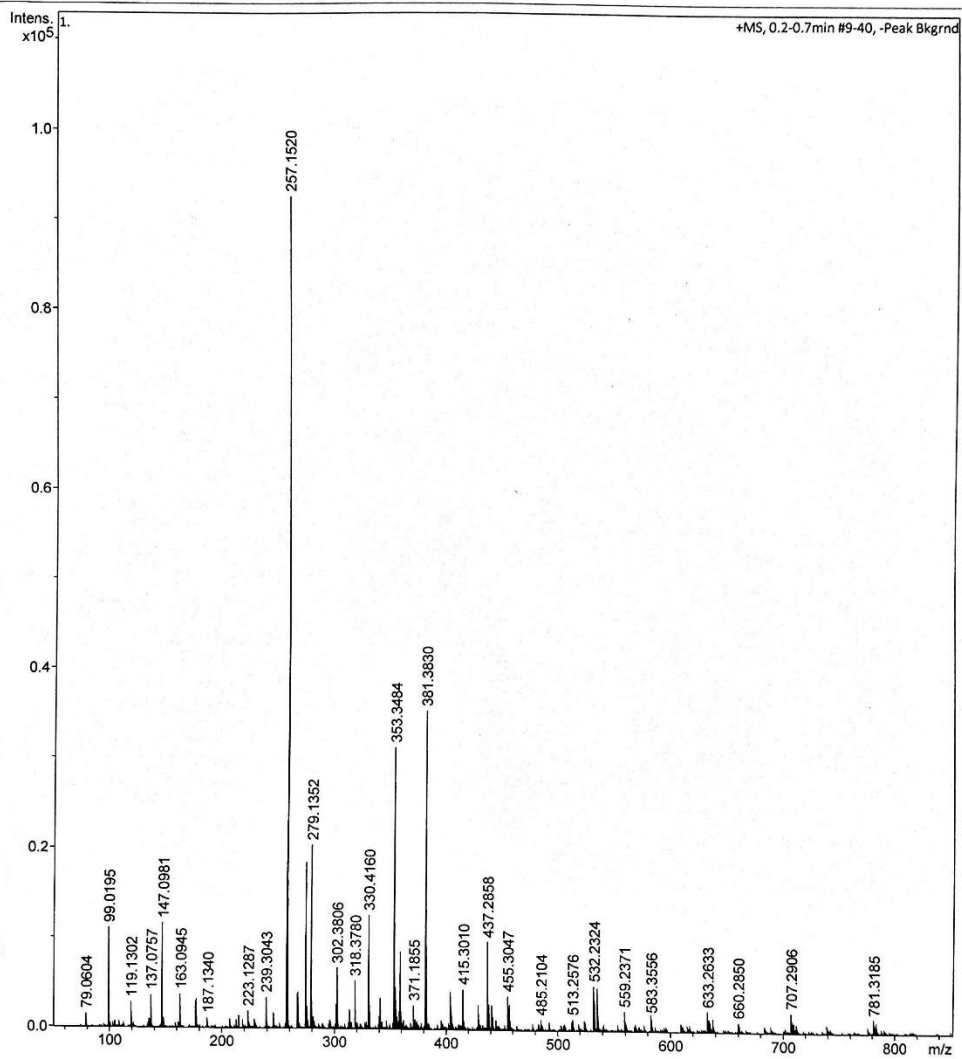

MS (ESI) spectrum of compound **LH-26**

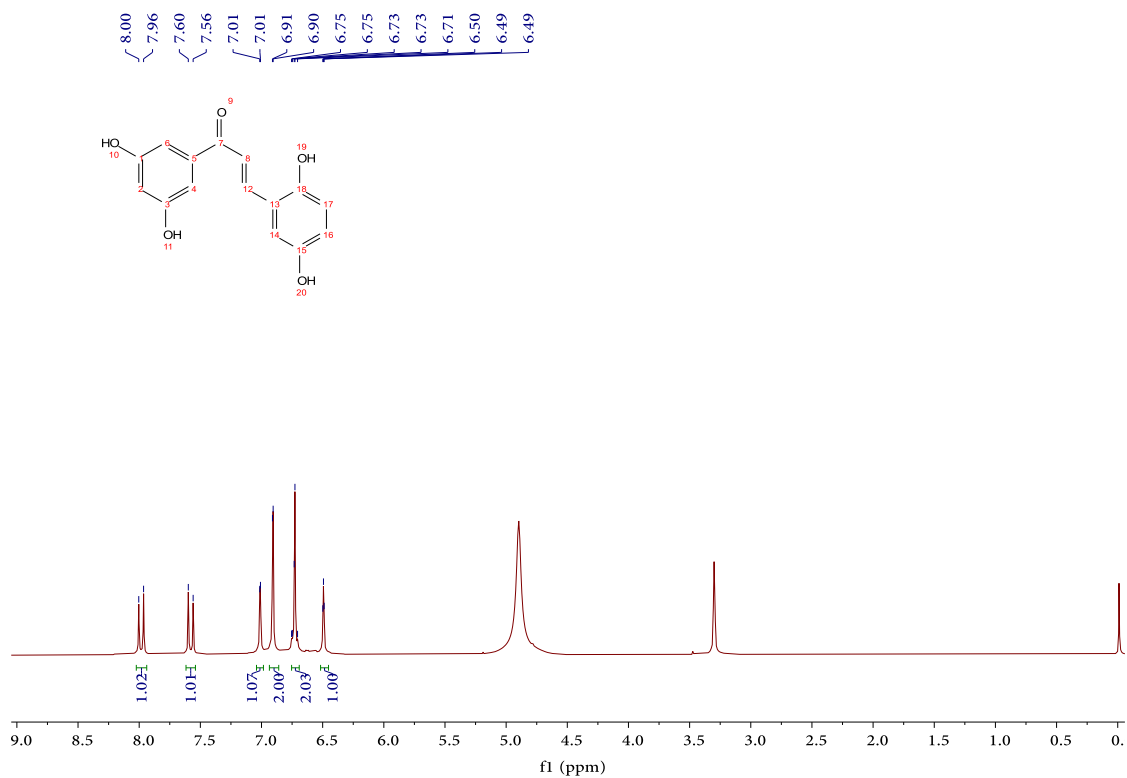

<sup>1</sup>H NMR spectrum of compound LH-27

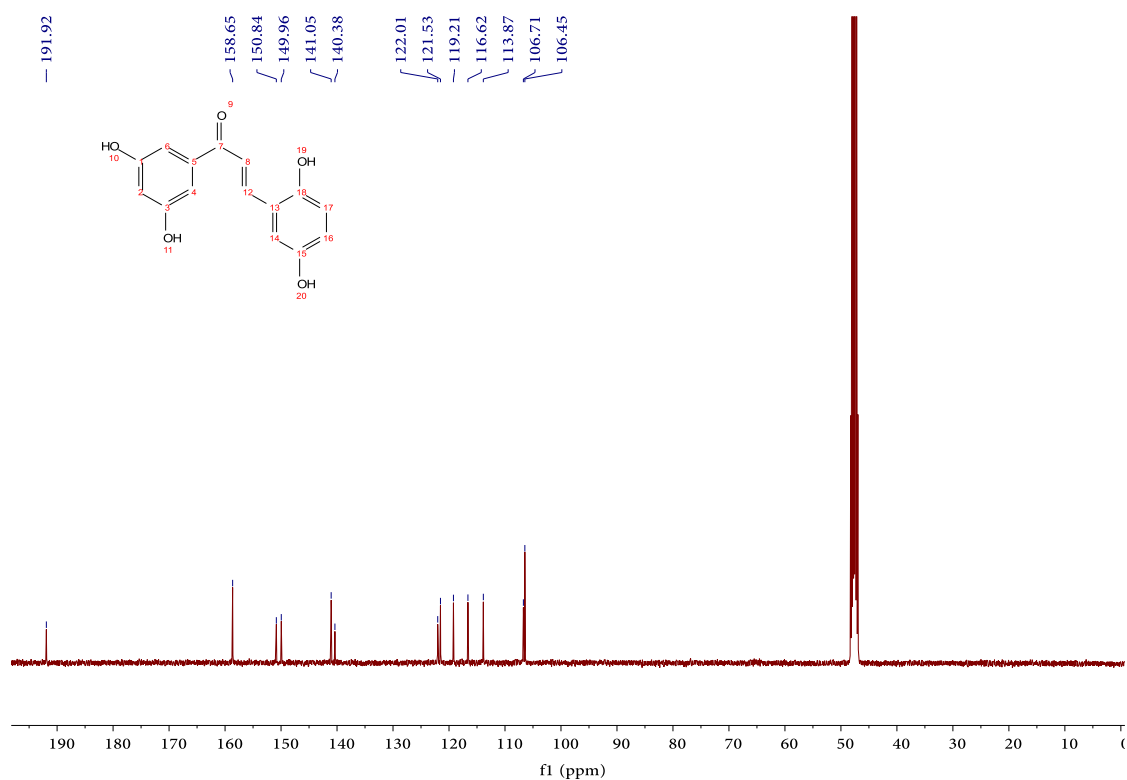

<sup>13</sup>C NMR spectrum of compound LH-27

# Generic Display Report

## Analysis Info

Analysis Name D:\Datayangy\new\LIHU201231\_3\_9\_01\_36593.d  
Method POS\_100-1200\_For LC.m  
Sample Name LIHU201231\_3  
Comment

Acquisition Date 12/31/2020 12:35:13 PM

Operator LZU  
Instrument micrOTOF

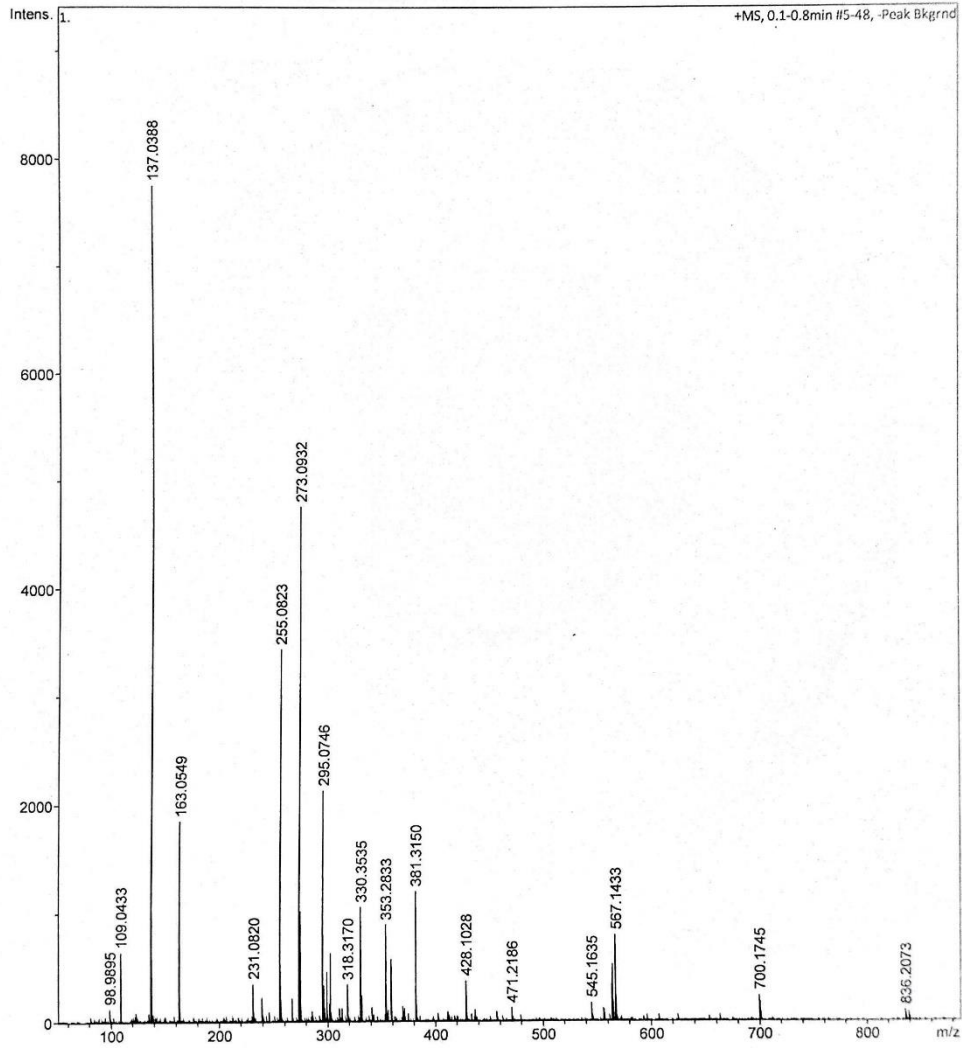

MS (ESI) spectrum of compound **LH-27**

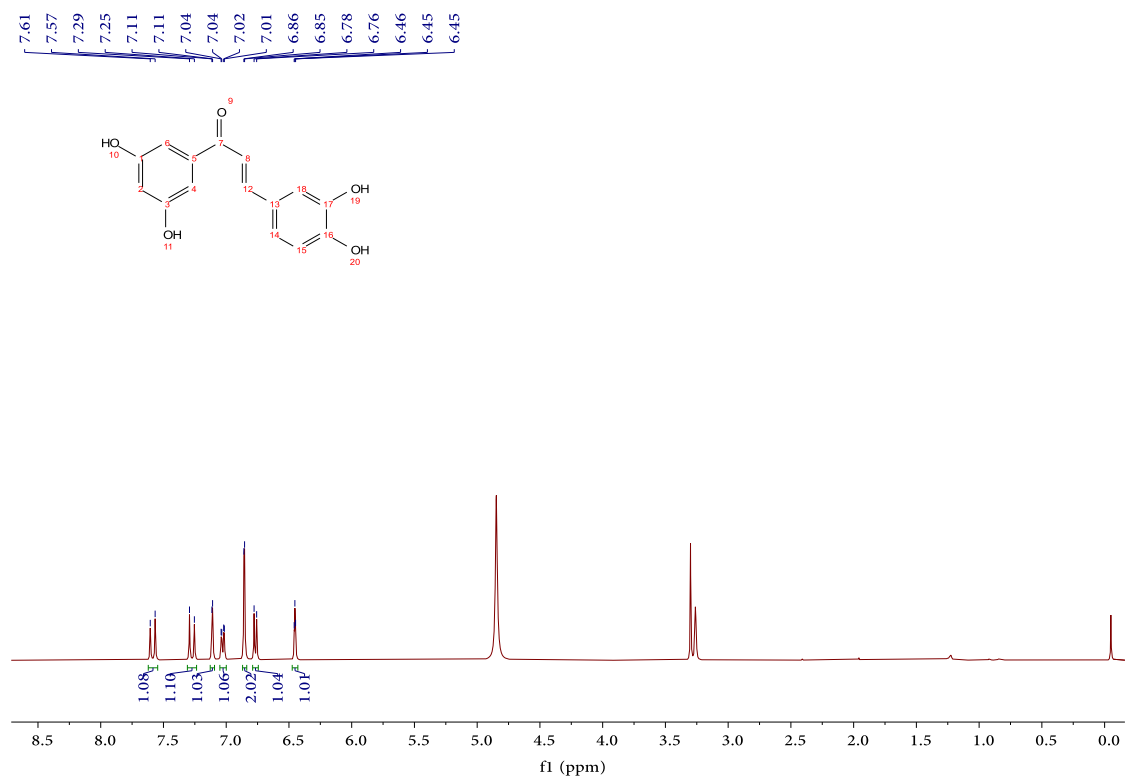

$^1\text{H}$  NMR spectrum of compound **LH-28**

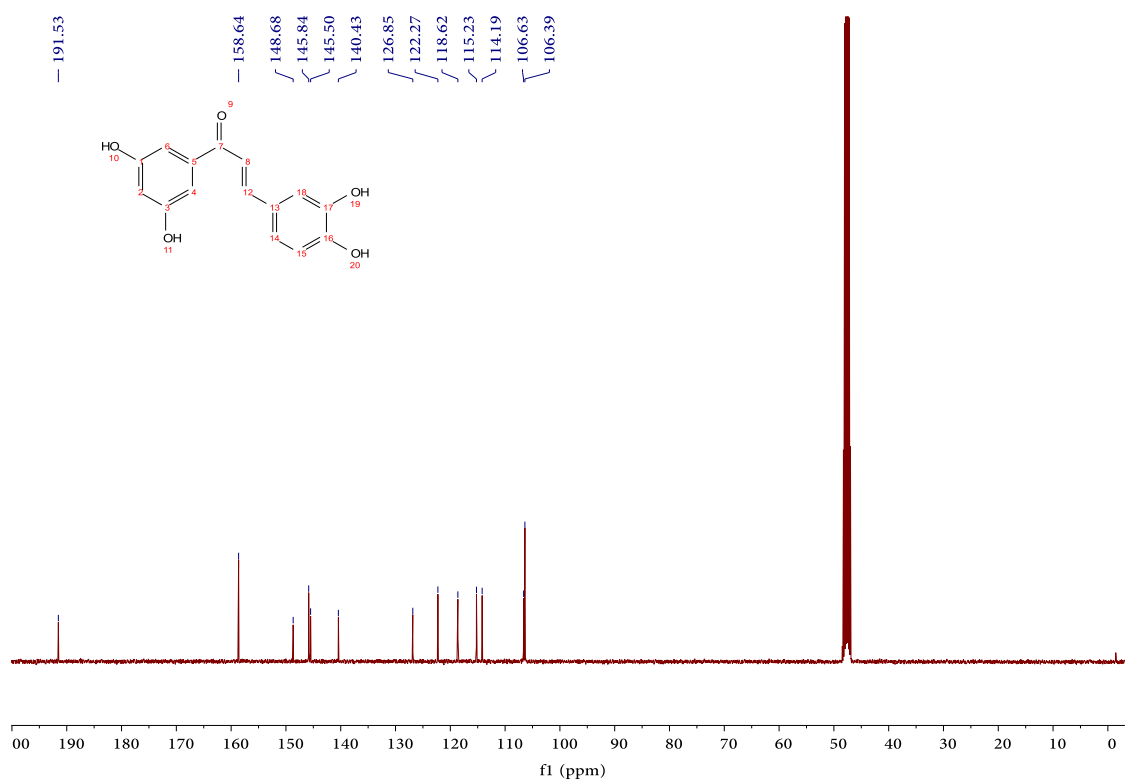

$^{13}\text{C}$  NMR spectrum of compound **LH-28**



# Generic Display Report

Analysis Info  
Analysis Name D:\Datayangy\new\LIHU201231\_9\_15\_01\_36599.d  
Method POS\_100-1200\_For LC.m  
Sample Name LIHU201231\_9  
Comment

Acquisition Date 12/31/2020 12:53:40 PM  
Operator LZU  
Instrument micrOTOF

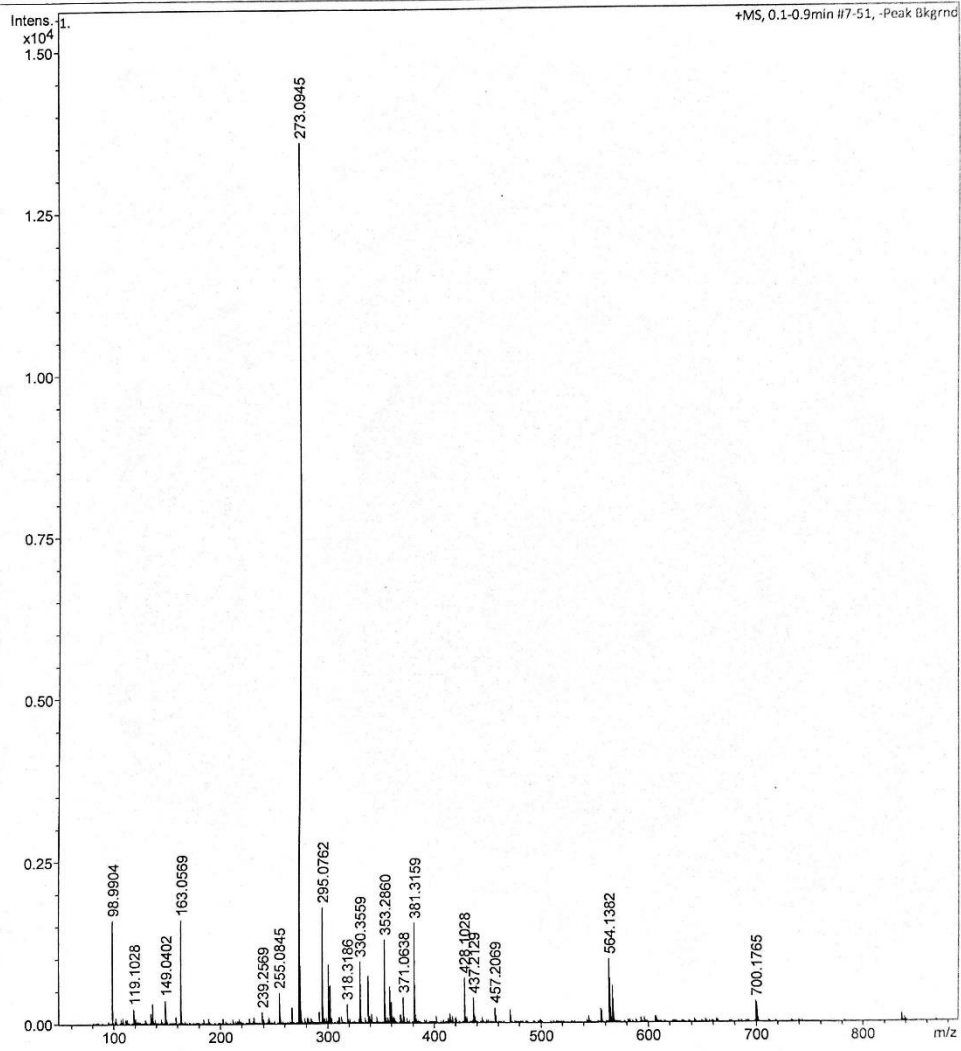

MS (ESI) spectrum of compound **LH-28**

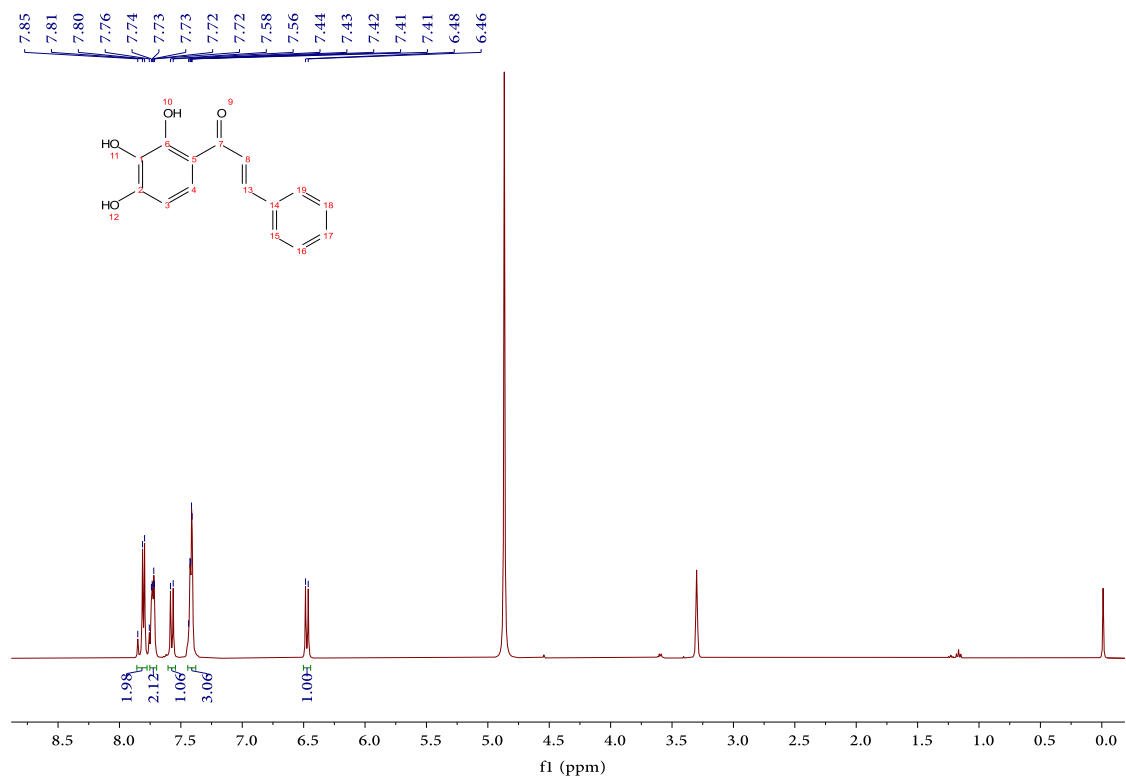

$^1\text{H NMR}$  spectrum of compound LH-29

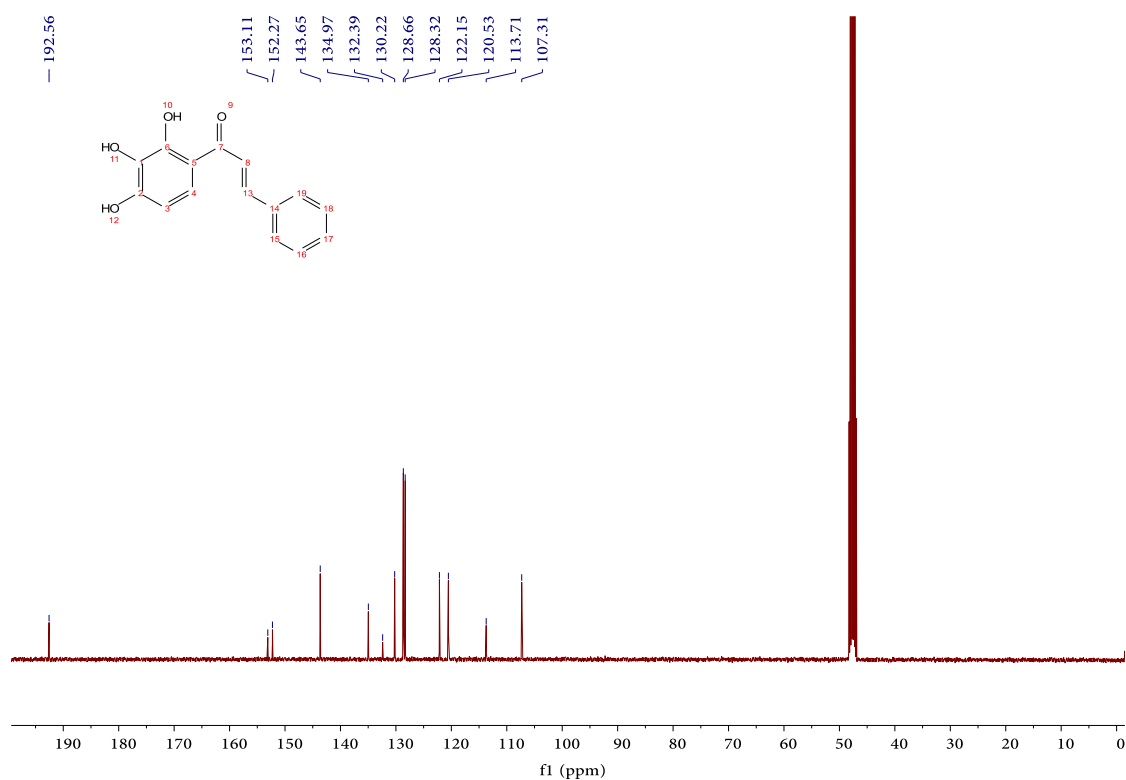

$^{13}\text{C NMR}$  spectrum of compound LH-29

# Generic Display Report

## Analysis Info

Analysis Name D:\Data\yangy\new\LIHU210112\_17\_26\_01\_36834.d  
Method POS\_100-1200\_For LC.m  
Sample Name LIHU210112\_17  
Comment

Acquisition Date 1/12/2021 1:17:15 PM

Operator LZU

Instrument micrOTOF

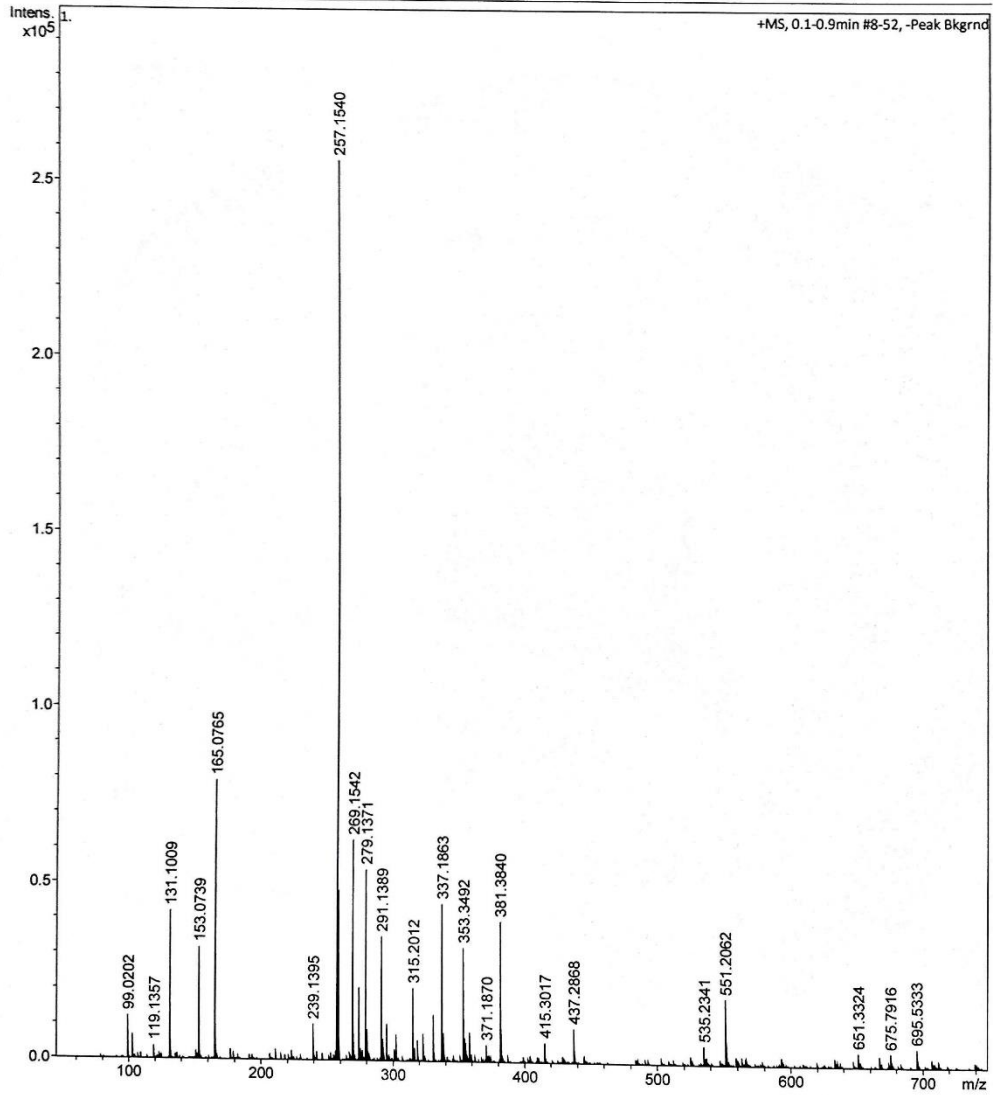

MS (ESI) spectrum of compound **LH-29**

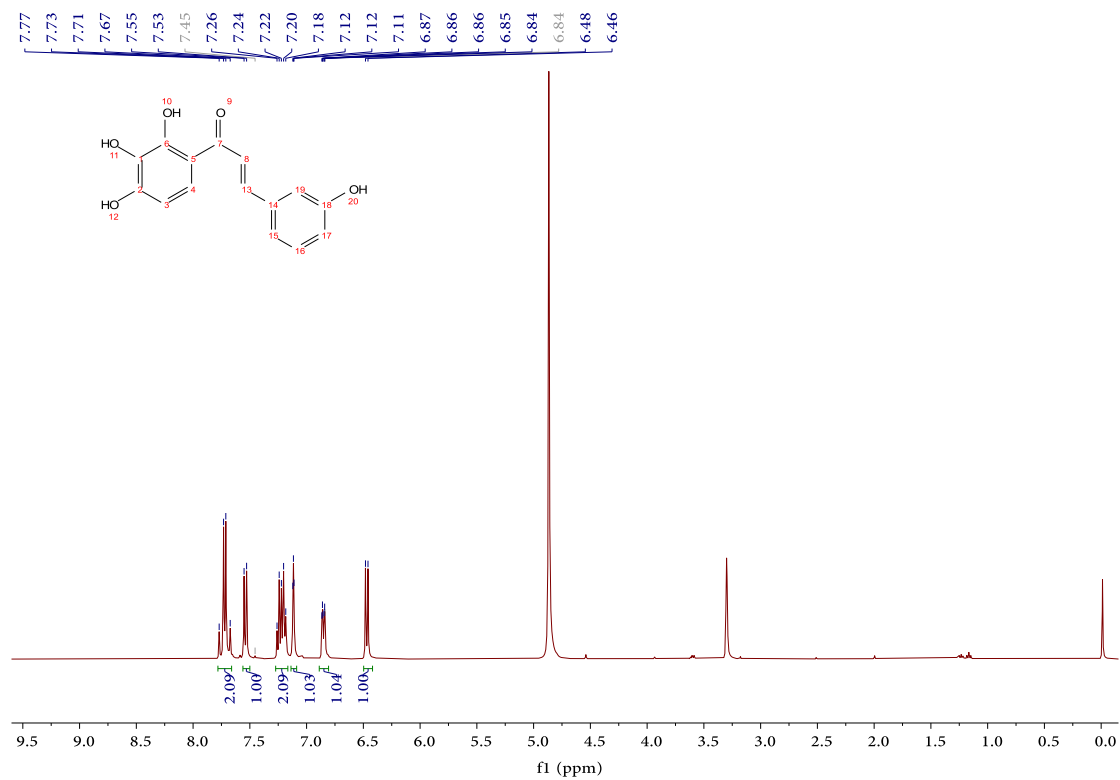

$^1\text{H NMR}$  spectrum of compound LH-30

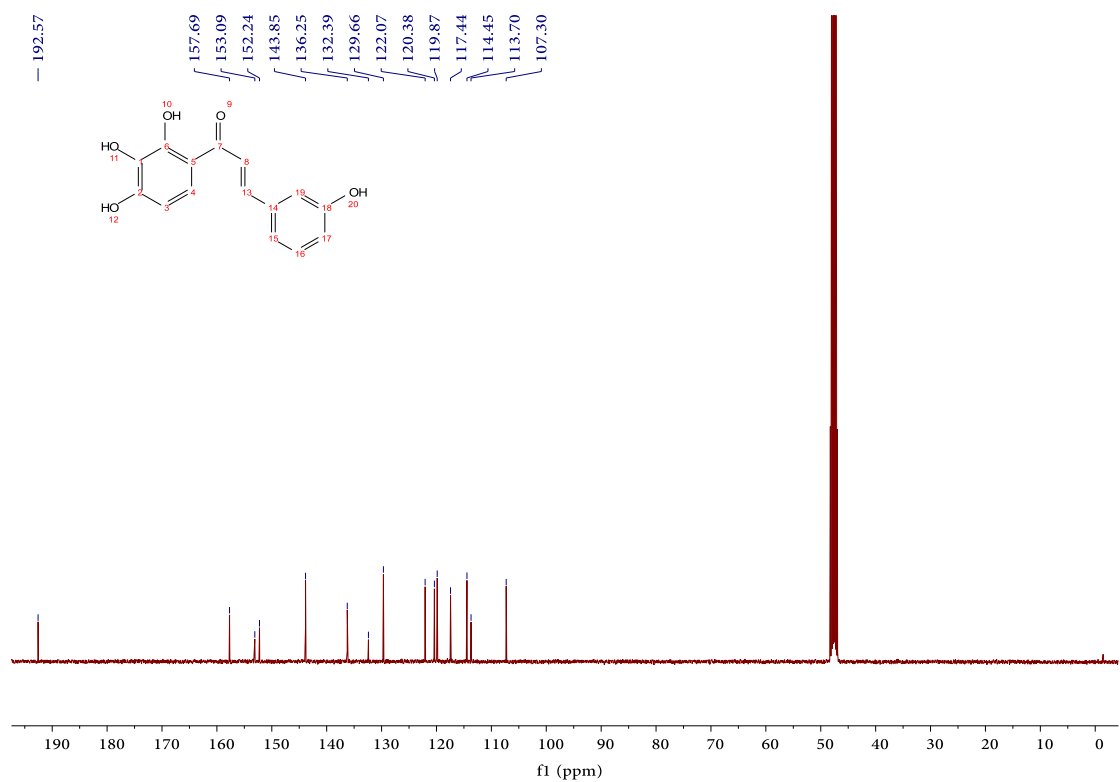

$^{13}\text{C NMR}$  spectrum of compound LH-30

## Generic Display Report

### Analysis Info

Analysis Name D:\Data\yangy\new\LIHU210112\_16\_25\_01\_36833.d  
Method POS\_100-1200\_For LC.m  
Sample Name LIHU210112\_16  
Comment

Acquisition Date 1/12/2021 1:14:11 PM

Operator LZU  
Instrument micrOTOF

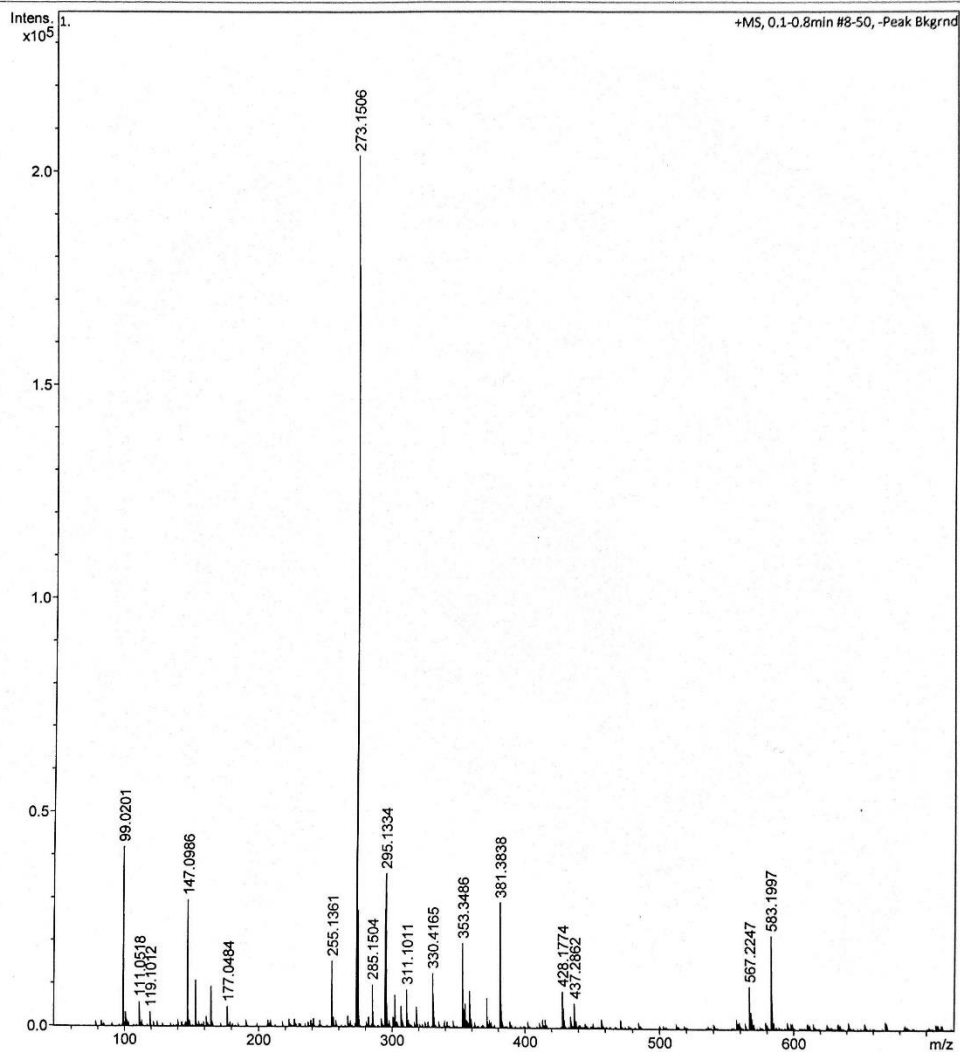

MS (ESI) spectrum of compound **LH-30**

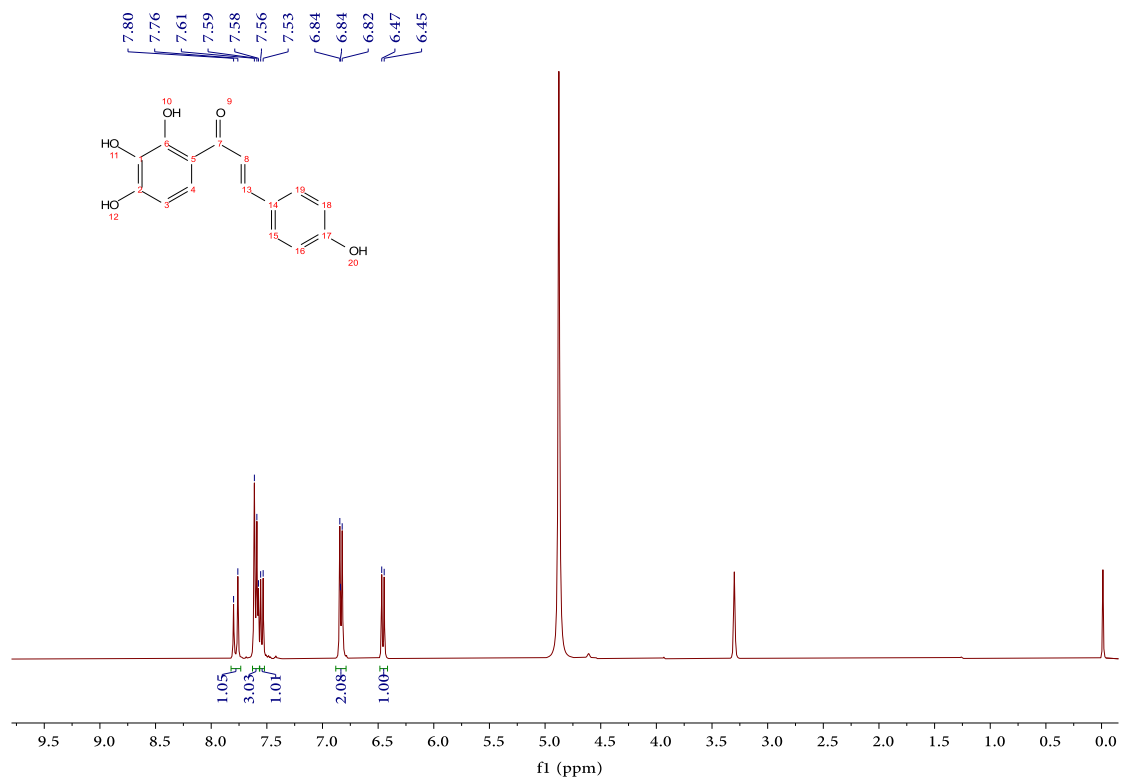

<sup>1</sup>H NMR spectrum of compound LH-31

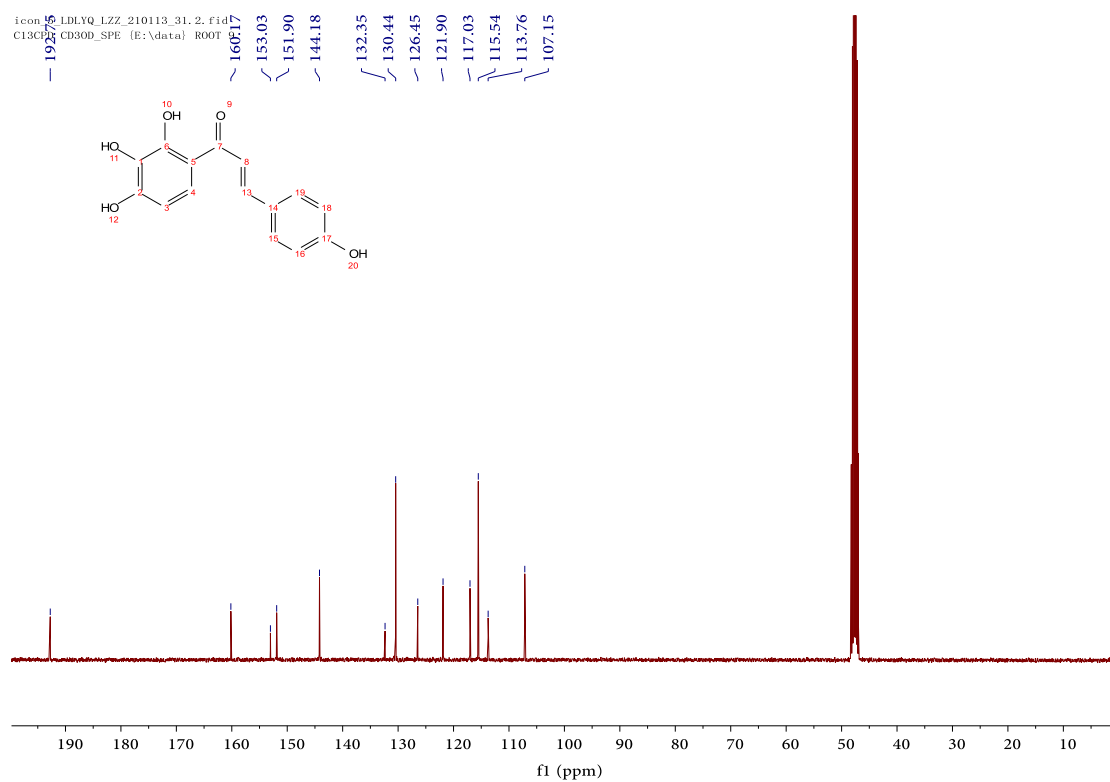

<sup>13</sup>C NMR spectrum of compound LH-31

# Generic Display Report

## Analysis Info

Analysis Name D:\Data\yangy\new\LIHU210112\_19\_28\_01\_36836.d  
Method POS\_100-1200\_For LC.m  
Sample Name LIHU210112\_19  
Comment

Acquisition Date 1/12/2021 1:23:27 PM

Operator LZU  
Instrument micrOTOF

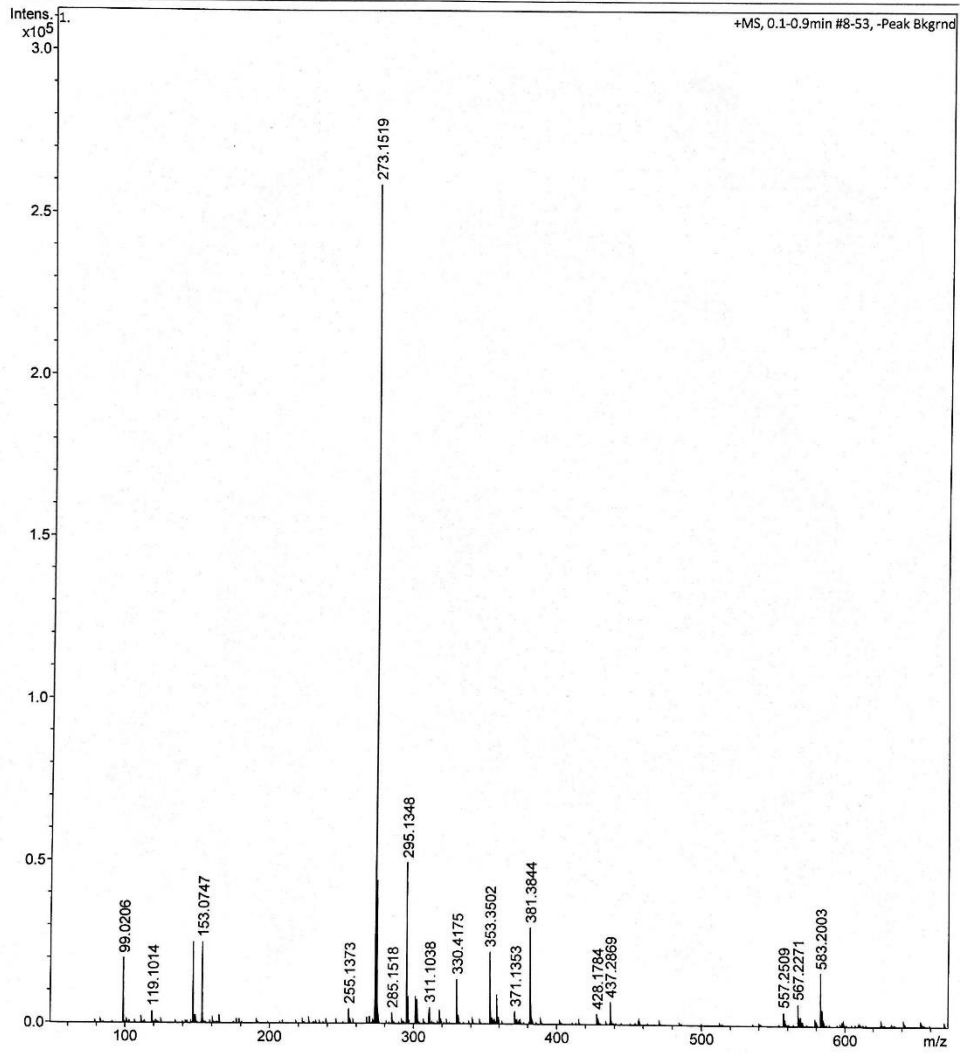

MS (ESI) spectrum of compound **LH-31**

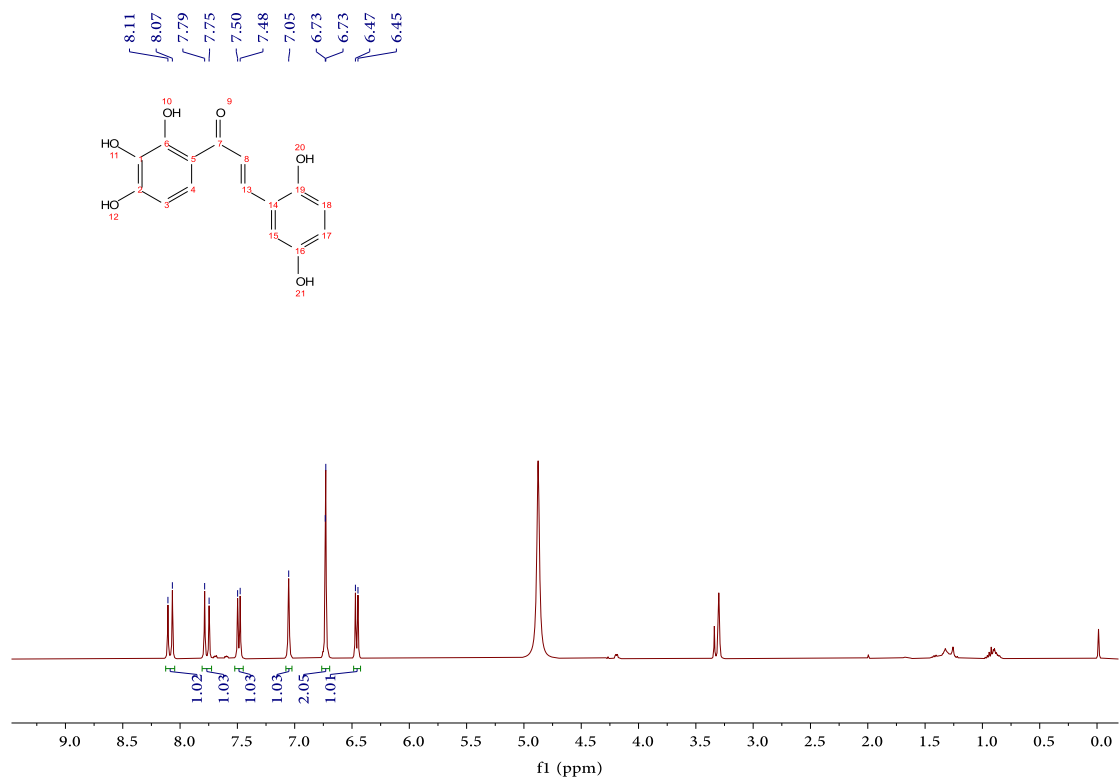

$^1\text{H}$  NMR spectrum of compound LH-32

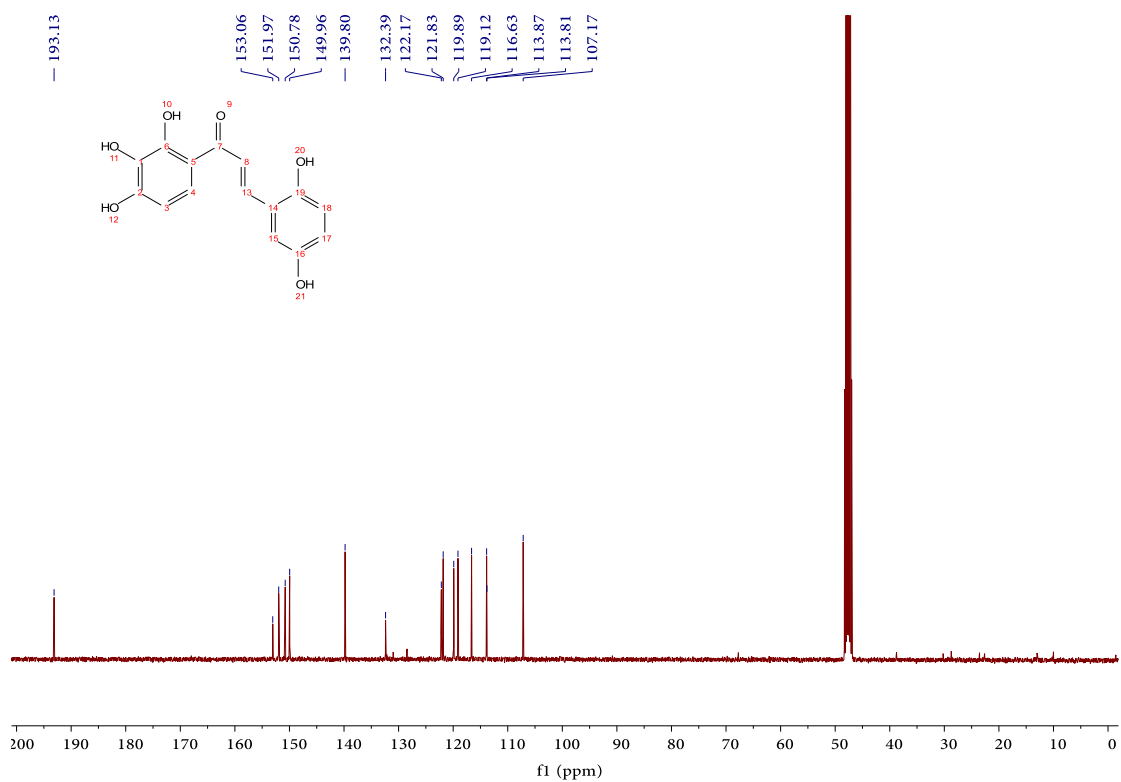

$^{13}\text{C}$  NMR spectrum of compound LH-32



## Generic Display Report

### Analysis Info

Analysis Name D:\Datayangy\new\LIHU201231\_6\_12\_01\_36596.d  
Method POS\_100-1200\_For LC.m  
Sample Name LIHU201231\_6  
Comment

Acquisition Date 12/31/2020 12:44:28 PM

Operator LZU  
Instrument micrOTOF

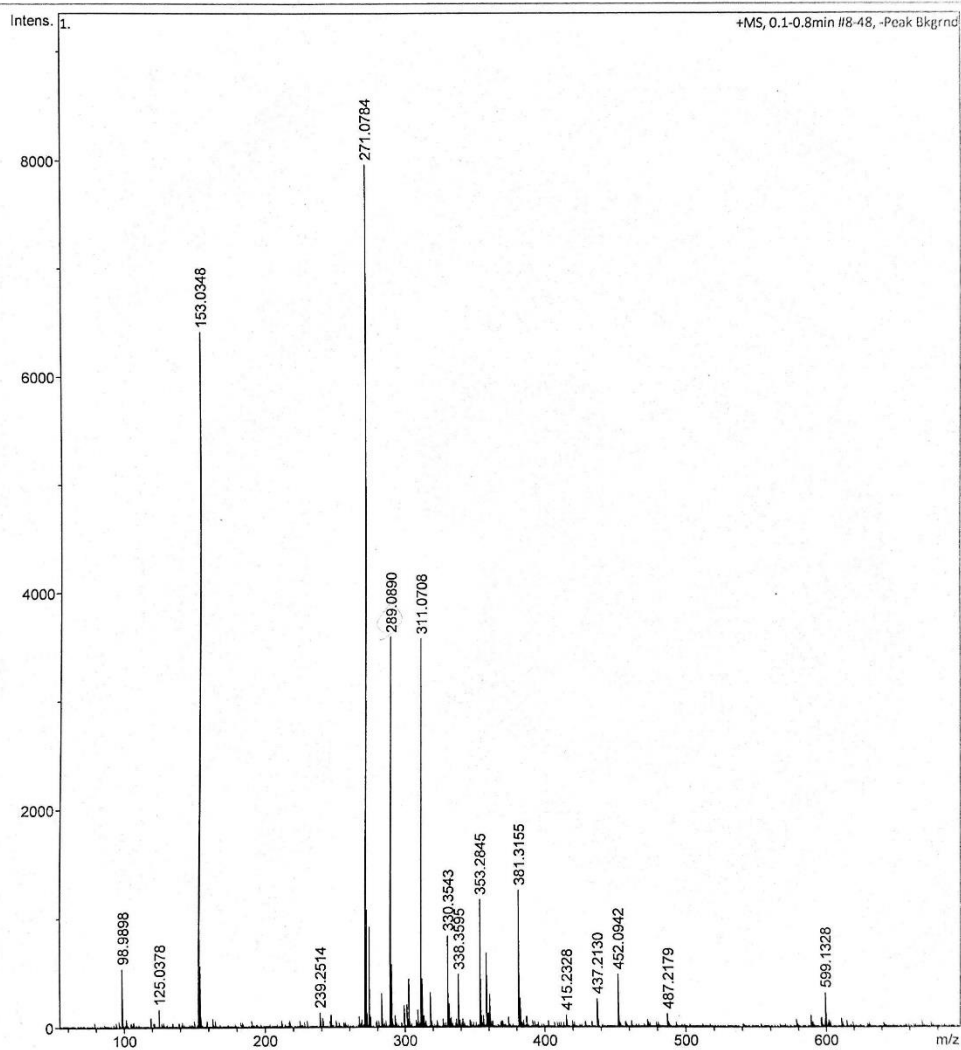

MS (ESI) spectrum of compound **LH-32**

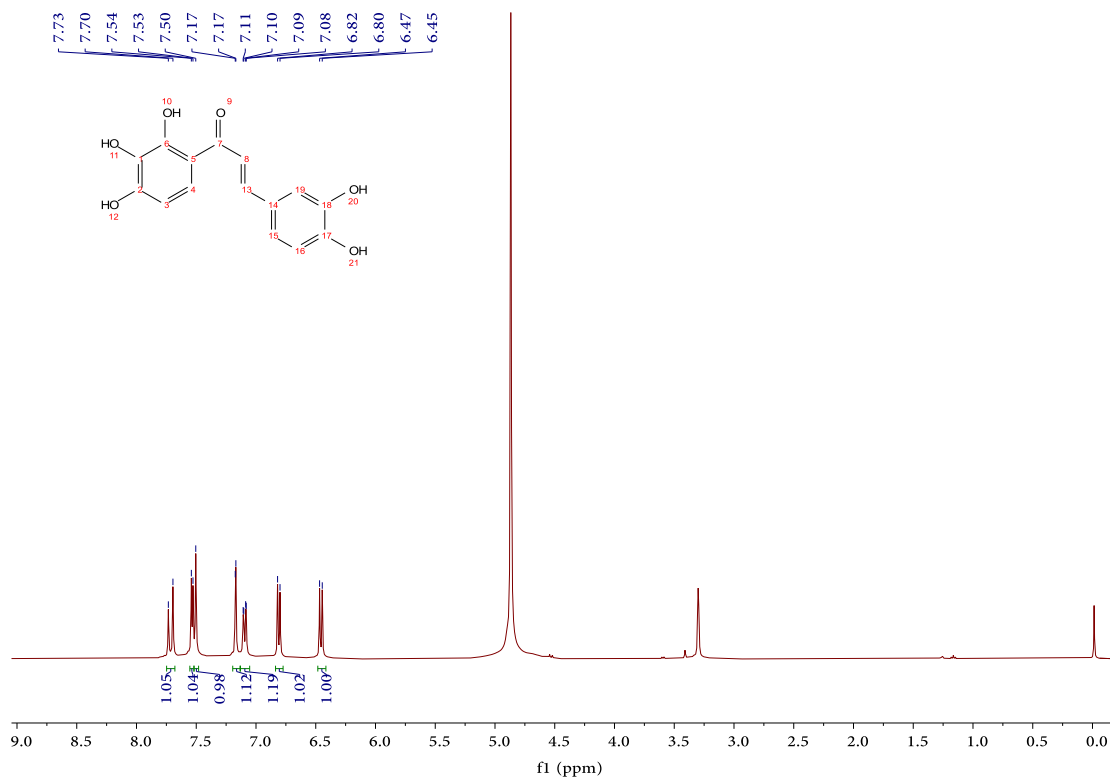

$^1\text{H}$  NMR spectrum of compound **LH-33**

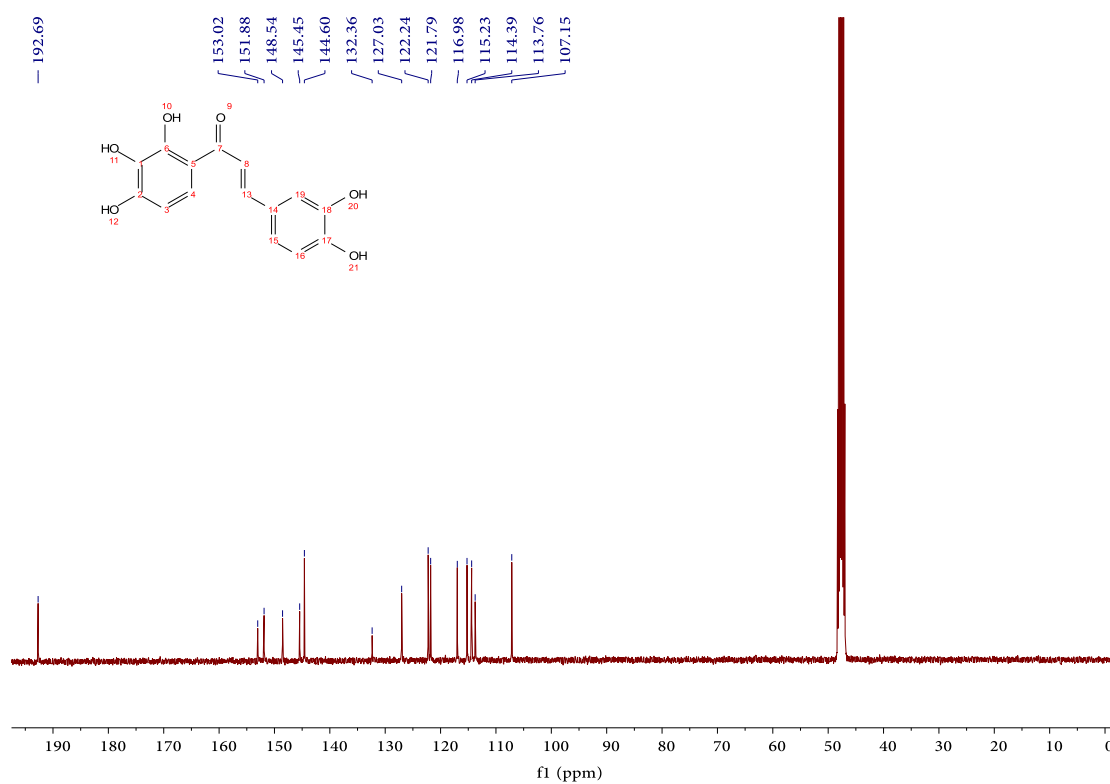

$^{13}\text{C}$  NMR spectrum of compound **LH-33**

## Generic Display Report

### Analysis Info

Analysis Name D:\Data\yangy\new\LIHU200921\_2\_41\_01\_33892.d  
Method NEG\_100-1200\_For LC.m  
Sample Name LIHU200921\_2  
Comment

Acquisition Date 9/21/2020 1:54:23 PM

Operator LZU  
Instrument micrOTOF

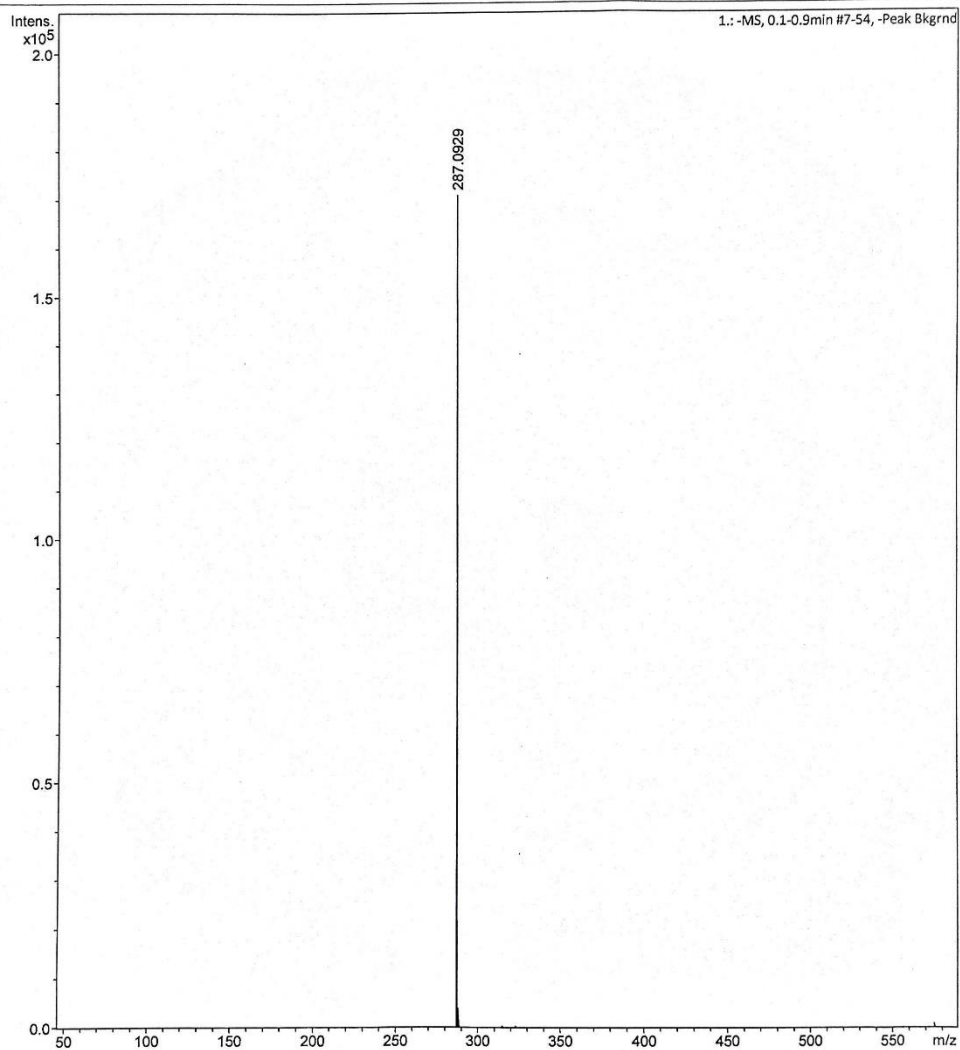

MS (ESI) spectrum of compound **LH-33**
